# Supplementary material
Source: PubMed Central journal article supplement (PMC4828257)
Supplement: NIHMS764289-supplement-2.pdf [file NIHMS764289-supplement-2.pdf]

| Name/Loci       | Forward                   | Reverse                | Used for K27 | Used for K4 | Notes                                                                               |
|-----------------|---------------------------|------------------------|--------------|-------------|-------------------------------------------------------------------------------------|
| Actb_TSS422     | CGTATTAGGTCCATCTTGAGAGTAC | GCCATTGAGGCGTGATCGTAGC | Y            | Y           | <a href="http://genesdev.cshlp.org/content">http://genesdev.cshlp.org/content</a> , |
| Chr_8           | AAGGGGCTCTGCTTAAAAA       | AGAGCTCCATGGCAGGTAGA   | Y            | Y           |                                                                                     |
| Col1a1_TSS2k    | ACTTCTGTCTCTCTGGTC        | ACAAAACGGGAAGTACACACC  | Y            | Y           |                                                                                     |
| Col1a1_TSS950   | GGGCGTGGTAACTCATCAT       | AACTAGACAAGCCGGGTCCT   |              |             |                                                                                     |
| Col1a2_TSS170   | TGCTGCTTGCAAGTAACTCG      | ATAAGGGTGCCACCTATCC    |              | Y           |                                                                                     |
| Col1a2_TSS47    | TGGCTGTAATCCTTCATGG       | CCCCTCTCTCGTTGATGA     |              |             |                                                                                     |
| Col1a2_TSS700   | CCTCGAAAGCCTCAAAGTG       | GGTACCGGGGCTTCTAAAT    | Y            |             |                                                                                     |
| Col3a1_TSS127   | GCAGGGACAACGTAGGTG        | AACCAGGTTCCACTTGGCAC   |              |             | No amplification                                                                    |
| Col3a1_TSS-1k   | GGCAGCTCTTCTCAAATCTG      | GCCCACTGAGATGTTCAA     |              |             |                                                                                     |
| Col3a1_TSS-4k   | TCCTAGGCAAAATGGAGTTGG     | TGAGATCCAGGGCTAGAACC   |              |             |                                                                                     |
| Col3a1_TSS220   | TTTGTGCAAAAGTGAACCTG      | TGGACTGCTGTGCAAAAATA   | Y            | Y           |                                                                                     |
| Ddr2_TSS1k      | GGAGGCAACGAATAGTGAGG      | TTCAGTGCCCTTCTTAGA     |              |             |                                                                                     |
| Egr1_TSS1311    | TTATCCCAGCCAACGACTC       | GGTTCAGGCCACAAAGTGT    | Y            | Y           |                                                                                     |
| Egr2_TSS-2025   | TTCTCTCTGTCCCTTTGA        | CAAACGCCAAAAGCATTAT    | Y            |             |                                                                                     |
| Egr2_TSS533     | GTCTTCTCGGAGCTGTGG        | TTCAGAGCCAGTGTGGTCAG   |              | Y           |                                                                                     |
| Egr3_TSS-16     | GGTAGCTCGGGAGTGCTATG      | TCCTCGGGGTACAGATTGTC   |              |             |                                                                                     |
| Egr3_TSS1991    | AAGGCCTTCAAAGACAAGCA      | CTAGGCCGATTGGGGTACTT   | Y            | Y           |                                                                                     |
| Egr3_TSS2659    | GAGGCACCTTCTCTTGCTG       | TGGATCAAGGCGATCCTAAC   |              |             |                                                                                     |
| Eln_TSS135      | CTGAAGGGCTCATCCATCTC      | CCACGCTGTCCACAATCTG    |              | Y           |                                                                                     |
| Eln_TSS525      | GCCTCTGATACCAGCCATGT      | ATGCTGTATGAGGGTTTGC    | Y            |             |                                                                                     |
| Fgf17_TSS150    | GAGAGACTGAGGTGCGAGGT      | GAAGCCAGTAGCCCAAGAGA   |              |             |                                                                                     |
| Fgf20_TSS100    | GCACCGCCAATAAAAAGTGT      | CACAGGGACCTCACAGGAGT   |              |             |                                                                                     |
| Fgfr4_TSS270    | GGGGCGGTAAATCAGTAAC       | CGGTGGGCAATAAGTAACCA   |              |             |                                                                                     |
| Foxc2_TSS-737   | GAAACCCACGAAATGTTTG       | TGCCAAACTGGGAAGGTAAC   | Y            |             |                                                                                     |
| Foxc2_TSS741    | GTTTCATCATGGACCGTTTCC     | GCACTTTCAGGAAGCACTCA   |              | Y           |                                                                                     |
| S100a4_TSS-550  | CACTGCCACCTAACTCCAT       | CCCAGGATAGAGGCTAGCAA   |              |             |                                                                                     |
| S100a4_TSS70    | GCATTATAGAGGCTGAGGCTA     | CGTGAAAAACACACACACACA  |              |             |                                                                                     |
| S100a4_TSS370   | CTCGGGTACAGGAAGCAAAG      | CCCAACCCATACGCTCATA    | Y            | Y           |                                                                                     |
| Gata4_TSS2k     | CCAATCCTCTCTCTGAAACC      | TCAAGTGCCGTTGATCTTCA   |              |             |                                                                                     |
| Gata4_TSS71     | GGTTTTCTGGGAAACTGGAG      | TCCCAGCTACTACCTCCCTA   |              | Y           |                                                                                     |
| Gata4_TSS-7k    | CAACAACAACAACCACAGCA      | CACCTTGGAAAGTTCTGAGC   |              |             |                                                                                     |
| Gata4_TSS-6k    | GTGCCCAGAGAGACAGGAAA      | ATCTCCCTCCCAAGCTCTA    | Y            |             |                                                                                     |
| Hoxa10_TSS-871  | CAATTGCAGCTCAATCCTGA      | TTTTCTGCAAAATGCTCC     |              |             |                                                                                     |
| Hoxa10_TSS1524  | TTTTCTGGCATGGCTTAG        | CGTGATAGTCTCCCTGT      |              |             |                                                                                     |
| Hoxc10_TSS-1701 | AGCCTAACCTTGCCCTGAAT      | GGGGAATCTGTGGAGTGT     |              |             |                                                                                     |
| Hoxc10_TSS902   | TTGAGCAGAGGCTAAGGAA       | TCGGTTTACCTTCCACTGCT   |              |             |                                                                                     |
| Jdp2_TSS53      | TGCCAGTTTAGAAGGCACT       | CTCCAGATACCCAGGCAAAG   | Y            | Y           |                                                                                     |
| Klf2_TSS-503    | GGCCTCAACTCCCTCTAGG       | CAGGGAACGCTCTGTGAAAT   |              | Y           |                                                                                     |
| Klf2_TSS1351    | CGAGGGACTCAGGTCTCAAG      | GCCACCATGCCAAACTTTAT   | Y            |             |                                                                                     |
| Klf3_TSS758     | GAAGAAGCATCCCTTTTCC       | ACCTCGGTGGTTCTTTTCT    | Y            | Y           |                                                                                     |
| Lox_TSS840      | GGGCCTCTCATACTGTCT        | AGCCACATAGATCGCATGTT   | Y            | Y           |                                                                                     |
| Mef2c_TSS 20    | GCCAGCACTGACAAGGCTCT      | GTGAGATGCGTGATCCCTCT   |              |             |                                                                                     |
| Mef2c_TSS14k    | CCCCTTCTACCCTCAACACA      | CCCCGGCTAGTTTCTAGAGC   |              |             |                                                                                     |
| Mef2c_TSS20k    | CCCCTTTGCAAGAGTGAAA       | GCCTTTTCTTTCCGTTTCT    |              | Y           |                                                                                     |
| Mef2c_TSS-6k    | TTGCCTAATCAAGCCATGT       | GGGCAAGGAAAAGGAAGAG    | Y            |             |                                                                                     |
| Mef2c_TSS-744   | TCATGACTGCCAAAGTGGAG      | TAGGCAGGCGGTATTCATTG   |              |             |                                                                                     |
| Msc_TSS627      | AGGGTGACATAGCTGTCT        | AGCTTTCCAAACTGGACACG   | Y            | Y           |                                                                                     |
| Myc_TSS-227     | GCGAGCAAGAGAAAATGGTC      | AAGAGGAGGAGGAGCCTCAG   | Y            | Y           |                                                                                     |
| Myc_TSS2313     | GCCCACTGAGGATATCTGGA      | GACCGCAACATAGGATGGAG   |              |             | Multiple products                                                                   |
| Myh6_TSS318     | GGGATATAAAGGGGCTGGAG      | CCTCTAGGTGGGAGAGGT     |              |             | No amplification                                                                    |
| Myh6_TSS-2k     | CCAGCCCCTAGGATAGTTC       | TTGAATCAGGTCCTTTGGAG   |              |             |                                                                                     |
| Myh6_TSS460     | CACCGTAGCCTATGGCTCTC      | CGGCACTCTTAGCAAACCTC   | Y            | Y           |                                                                                     |
| Nppa_TSS70      | GGCAGAGACAGCAAAATCA       | ACACCGCACTGTACACAGGA   |              |             |                                                                                     |
| Nppa_TSS-150    | ACAAGCTTTGCCGAACGAT       | AGAACCCTCCCACTTCTGTC   | Y            |             |                                                                                     |
| Nppa_TSS600     | GGGGGTAGGATTGACAGGAT      | TAACAAGACCCACCTGACC    |              | Y           |                                                                                     |
| Nppa_TSS800     | ACTACGATGGGTGCCCTTG       | GCAGTCTTGGCCCTGTATTC   |              |             |                                                                                     |
| Pdgfra_TSS-1500 | AAGCCTGTTGCGAGACCTTA      | CCGTTGAAGGGCAAATGTAT   |              |             | No amplification                                                                    |
| Pdgfra_TSS700   | GCACCAGGAGAAGTGTGTG       | CCCTCACACCTCCCTTTT     | Y            | Y           |                                                                                     |
| Pln_TSS4        | TACTGCAGCTGCTCCATAA       | CACGTCTTACCTTGGCTTCG   | Y            | Y           |                                                                                     |
| Pln_TSS-1k      | GGAAAAGAGGGAGGCTGATTT     | CACATGTGTGGACCCTGATT   |              |             |                                                                                     |
| Pln_TSS-2k      | CTTTGTGTCATGTGCCAAT       | TGCTCCACTTGAGTCTTGG    |              |             |                                                                                     |
| Postn_TSS56     | TATGCTCTGCTGCTGCTTT       | AACAAGCCAGGACTTACCC    |              | Y           |                                                                                     |
| Postn_TSS-1k    | CACTGAAAGGAACTTCTCATGG    | GTTGAAGGGAGGCCACATTA   |              |             |                                                                                     |
| Postn_TSS-3k    | ATGCTTACAGAAACCCCACTC     | AGCCAGCTACAGAGGTCAA    | Y            |             |                                                                                     |
| Ryr2_TSS-14k    | TTGAAAAGGGCCTAGGAGGT      | GCTGACTCAGAGCACACAGG   |              |             |                                                                                     |
| Ryr2_TSS354     | AGCCCTAGAACATCCTGGT       | TATGCTGCTGCTGCTACTGC   | Y            | Y           |                                                                                     |
| Ryr2_TSS-50     | GCACGCGCCAGTTGATT         | GCTGCTCAGGTAATCCG      |              |             | No amplification                                                                    |
| Ryr2_TSS670     | CCTCCATGGCATTGGTATCT      | GAGTACTTGGCGGTGTCGAT   |              |             |                                                                                     |
| Ski_TSS2457     | CATGGAGGAAATGACCCAAG      | CTCAGGGGATTTGGTTCAGA   | Y            | Y           |                                                                                     |
| Sox9_TSS-1212   | CGGCTCCAAGCACTTAAAA       | GGGCTTGGACTTTAGTTGC    |              |             |                                                                                     |
| Sox9_TSS1235    | GGATCAACAGAGCGAGCTTC      | TCTAAACGCCCTTGTACTCCG  |              |             | No amplification                                                                    |
| Sox9_TSS2168    | ACTTTTCTTTGCGCCTCA        | TTTTATCAGGGGAGGGTCT    | Y            |             |                                                                                     |

|                 |                        |                       |   |   |                  |
|-----------------|------------------------|-----------------------|---|---|------------------|
| Sox9_TSS57      | GGGAGCGACAACCTTACCAG   | AGGAGGGAGGGAAAAACAGAG |   | Y |                  |
| Tbx5_TSS276     | AGAGCAGAGCAGGACACTGAG  | TGTTTCGCTAGCCCCAAATAC |   |   |                  |
| Tbx5_TSS-6k     | CCGAGGGATACAAGACTGGA   | AGGACTCTGGGTTTCTGGT   |   |   | No amplification |
| Tbx5_TSS91      | GCACCCAGCTGAGTTAGTT    | CAGCCAGCTGTTTTCAGAGA  |   |   |                  |
| Tbx5_TSS600     | CCCCTGTACAGAGCGAGGTA   | AGTCCGCCATTCTGTGTTTC  | Y | Y |                  |
| Tcf21_TSS6504   | CTGAACTGAGCTTGCACCAG   | GGGATGTGAGAGAAGCTTGG  |   |   |                  |
| Tcf21_TSS921    | TAAGAATCGGAGGGGAACT    | GTCGTGAAACTGAGCAGACG  |   |   |                  |
| Tcf21_TSS175    | GCATCTCCACCTCTTGAAGG   | TTCCGTTTCAGCGTCTCTCT  | Y | Y |                  |
| Tcf21_TSS1926   | GGCAGATGTTCCAGGAGTTC   | GCCAGGATGCTAGACCAGAG  |   |   |                  |
| Tcf21_TSS3614   | GGGGGTAAGGGGTGTCTAAA   | GGGTTATGACCGCAGTGTTT  |   |   |                  |
| Thy1_TSS-200    | GGTCCCTAACCGTCTTTTCC   | AGGTGTTCCATTTGGGTGTC  |   |   |                  |
| Thy1_TSS675     | CTTAGGTGGGCTGGGTATGA   | GGAGAAGCCTGGCAGAACTA  | Y | Y |                  |
| Tnnt2_TSS-250   | TCAAGAGGGACAGCTGGTTT   | AACAAGTACCCACGCCATA   |   |   |                  |
| Tnnt2_TSS3k     | CATACCCACAGGGGAGGAG    | GCTGCCTCCCTAGAGTCCTT  |   |   |                  |
| Tnnt2_TSS73     | GTGTGCAGTCCCTGTTTCTAGA | AGGGTGGACACAAGCAAAAAG | Y | Y |                  |
| Twist1_TSS-1500 | CTTTGGTCCAACCCAGAAAAG  | GCTGAGGACCTTGCTAAACG  | Y | Y |                  |
| Twist1_TSS-191  | GAATTGTTAGACCCCGAGCA   | GTGGGGAGGAGGGACTTTT   |   |   | No amplification |
| Twist2_TSS1360  | GCAAGCAGGTGGATCGTATT   | GACCTGTACCCAGCCTGAA   | Y | Y |                  |
| Vim_TSS65       | CCTCATTCCCTTGTTGCAGT   | GGTAGGAGGACGAGGACACA  | Y | Y |                  |
| Xbp1_TSS1088    | CATATCAGGGCCCATCCTAA   | TCTGCTTTCACGGCCTATCT  | Y | Y |                  |
