# Supplementary material
Source: PubMed Central journal article supplement (PMC4828257)
Supplement: NIHMS764289-supplement-3.pdf [file NIHMS764289-supplement-3.pdf]

|                                           | EntrezGene ID                                      | Full Name                                                  | MGI symbol                | CM expression      | CF expression      | CF/CM                                                                                                                                                                                                                                                                                                            | Notes (function, tissue expression, mutant phenotype)                                                                                                                                                                                                                                                                                                                  |
|-------------------------------------------|----------------------------------------------------|------------------------------------------------------------|---------------------------|--------------------|--------------------|------------------------------------------------------------------------------------------------------------------------------------------------------------------------------------------------------------------------------------------------------------------------------------------------------------------|------------------------------------------------------------------------------------------------------------------------------------------------------------------------------------------------------------------------------------------------------------------------------------------------------------------------------------------------------------------------|
| Cardiac reprogramming factors             | Mef2c                                              | myocyte enhancer factor 2C                                 | NM_001170537<br>NM_025282 | 11.7793<br>3.93032 | 6.54233<br>2.03041 | 0.5554<br>0.5166                                                                                                                                                                                                                                                                                                 | transcription factor; heart; homozygote death in embryo cardiac abnormalities                                                                                                                                                                                                                                                                                          |
|                                           | Gata4                                              | GATA binding protein 4                                     | NM_008092                 | 50.1872            | 43.4999            | 0.8668                                                                                                                                                                                                                                                                                                           | transcription factor; heart; homozygote null mutation exhibit defects in ventral morphogenesis, primitive heart tube and foregut and develop partially outside of yolk sac, death by midgestation                                                                                                                                                                      |
|                                           | Tbx5                                               | T-box 5                                                    | NM_011537                 | 7.14428            | 0.569986           | 0.0798                                                                                                                                                                                                                                                                                                           | transcription factor; heart; heterozygote null exhibit perinatal lethality and forelimb and heart malformations, homozygote null exhibit growth arrest and die from severe heart defects                                                                                                                                                                               |
|                                           | Tnnt2                                              | troponin T2, cardiac                                       | NM_001130174              | 20.3754            | 1.09994            | 0.0540                                                                                                                                                                                                                                                                                                           | tropomyosin binding subunit; heart, skeletal muscle, vertebral axis musculature; homozygote null exhibit embryonic lethality and abnormal development, homozygote with missing lysine at position 210 exhibit dilated cardiomyopathy                                                                                                                                   |
|                                           |                                                    |                                                            | NM_001130175              | 9.28032            | 1.80206            | 0.1942                                                                                                                                                                                                                                                                                                           |                                                                                                                                                                                                                                                                                                                                                                        |
|                                           |                                                    |                                                            | NM_001130176              | 0                  | 0                  | #DIV/0!                                                                                                                                                                                                                                                                                                          |                                                                                                                                                                                                                                                                                                                                                                        |
|                                           |                                                    |                                                            | NM_001130177              | 439.651            | 35.5559            | 0.0809                                                                                                                                                                                                                                                                                                           |                                                                                                                                                                                                                                                                                                                                                                        |
|                                           |                                                    |                                                            | NM_001130178              | 363.129            | 29.7198            | 0.0818                                                                                                                                                                                                                                                                                                           |                                                                                                                                                                                                                                                                                                                                                                        |
|                                           |                                                    |                                                            | NM_001130179              | 35.6026            | 3.05964            | 0.0859                                                                                                                                                                                                                                                                                                           |                                                                                                                                                                                                                                                                                                                                                                        |
|                                           |                                                    |                                                            | NM_001130180              | 0                  | 0                  | #DIV/0!                                                                                                                                                                                                                                                                                                          |                                                                                                                                                                                                                                                                                                                                                                        |
|                                           |                                                    |                                                            | NM_001130181              | 43.1253            | 3.17644            | 0.0737                                                                                                                                                                                                                                                                                                           |                                                                                                                                                                                                                                                                                                                                                                        |
|                                           | NM_011619                                          | 2670.45                                                    | 226.999                   | 0.0850             |                    |                                                                                                                                                                                                                                                                                                                  |                                                                                                                                                                                                                                                                                                                                                                        |
|                                           | Ryr2                                               | ryanodine receptor 2, cardiac                              | NM_023868                 | 44.4379            | 2.45445            | 0.0552                                                                                                                                                                                                                                                                                                           | calcium receptor; heart; homozygote null exhibit embryonic lethality and adnormal cardiomyocyte morphology, homozygote with phosphorylation defective exhibit decreased susceptibility to myocardial infarction-induced heart failure                                                                                                                                  |
| Myh6                                      | myosin, heavy polypeptide 6, cardiac muscle, alpha | NM_001164171                                               | 0                         | 6.07031            | #DIV/0!            | alpha heavy chain subunit for myosin; vertebral axis musculature, heart, diaphragm, eye; homozygote knock-out exhibit embryonic lethality with heart defects, heterozygote exhibit cardiac myofibrillar disarray, cardiac dysfunction and fibrosis, cardiomyopathy                                               |                                                                                                                                                                                                                                                                                                                                                                        |
|                                           |                                                    | NM_010856                                                  | 0                         | 99.3557            | #DIV/0!            |                                                                                                                                                                                                                                                                                                                  |                                                                                                                                                                                                                                                                                                                                                                        |
| Nppa                                      | natriuretic peptide type A                         | NM_008725                                                  | 3011.67                   | 52.4805            | 0.0174             | vasodilator; heart; homozygotes are hypertensive, salt-sensitive hypertension, abnormal pulmonary vascular remodeling                                                                                                                                                                                            |                                                                                                                                                                                                                                                                                                                                                                        |
| Pln                                       | phospholamban                                      | NM_001141927                                               | 17.7235                   | 1.58248            | 0.0893             | calcium ion pump regulator; heart; homozygotes null exhibit enhanced myocardial function, overtly normal and fertile                                                                                                                                                                                             |                                                                                                                                                                                                                                                                                                                                                                        |
|                                           |                                                    | NM_023129                                                  | 416.148                   | 33.2151            | 0.0798             |                                                                                                                                                                                                                                                                                                                  |                                                                                                                                                                                                                                                                                                                                                                        |
| Fibroblast markers                        | Col1a1                                             | collagen, type I, alpha 1                                  | NM_007742                 | 145.692            | 1261.01            | 8.6553                                                                                                                                                                                                                                                                                                           | pro-alpha1 chain for type I collagen; femur, lung, eye; homozygotes show impaired bone formation and fragility, osteoporosis, dermal fibrosis, impaired uterine postpartum involution, aortic dissection                                                                                                                                                               |
|                                           | Col1a2                                             | collagen, type I, alpha 2                                  | NM_007743                 | 167.323            | 1213.14            | 7.2503                                                                                                                                                                                                                                                                                                           | pro-alpha2 chain for type I collagen; heart, bone; homozygotes show reduced body size, fractured/deformed bones, droopy wrists, abnormal gait                                                                                                                                                                                                                          |
|                                           | Col3a1                                             | collagen, type III, alpha 1                                | NM_009930                 | 255.265            | 0                  | 0.0000                                                                                                                                                                                                                                                                                                           | pro-alpha1 chain for type III collagen; brain, gland; homozygotes die within 48 hours after birth, surviving show reduced body size, skin lesions, enlarged intestines, heterozygotes show tight skin                                                                                                                                                                  |
|                                           | Postn                                              | periostin, osteoblast specific factor                      | NM_001198765              | 159.716            | 0                  | 0.0000                                                                                                                                                                                                                                                                                                           | integrin ligand; heart, dermis; homozygotes null show teeth abnormalities                                                                                                                                                                                                                                                                                              |
|                                           |                                                    |                                                            | NM_001198766              | 53.6912            | 0                  | 0.0000                                                                                                                                                                                                                                                                                                           |                                                                                                                                                                                                                                                                                                                                                                        |
|                                           | NM_015784                                          | 165.802                                                    | 0                         | 0.0000             |                    |                                                                                                                                                                                                                                                                                                                  |                                                                                                                                                                                                                                                                                                                                                                        |
|                                           | S100a4                                             | S100 calcium binding protein A4                            | NM_011311                 | 20.1413            | 44.5051            | 2.2096                                                                                                                                                                                                                                                                                                           | regulation of cellular processes; brain, eye; homozygote show tumor formation, embryonic lethality                                                                                                                                                                                                                                                                     |
|                                           | Thy1                                               | thymus cell antigen 1, theta                               | NM_009382                 | 9.72583            | 127.806            | 13.1409                                                                                                                                                                                                                                                                                                          | immunoglobulin; brain, dermis, vibrissa(whiskers); homozygote null are viable, fertile and little abnormalities                                                                                                                                                                                                                                                        |
|                                           | Vim                                                | vimentin                                                   | NM_011701                 | 2027.59            | 0                  | 0.0000                                                                                                                                                                                                                                                                                                           | type III intermediate filament; brain; homozygotes null show impaired motor coordination, underdeveloped brain                                                                                                                                                                                                                                                         |
|                                           | Eln                                                | elastin                                                    | NM_007925                 | 798.513            | 1103.29            | 1.3817                                                                                                                                                                                                                                                                                                           | elastin; lung, skeleton; homozygotes null die early, defective airway development                                                                                                                                                                                                                                                                                      |
|                                           | Pdgfra                                             | platelet derived growth factor receptor, alpha polypeptide | NM_001083316              | 0.806032           | 6.60161            | 8.1903                                                                                                                                                                                                                                                                                                           | growth factor; heart; homozygotes null show impaired testis formation, thoracic skeletal defects                                                                                                                                                                                                                                                                       |
|                                           |                                                    |                                                            | NM_011058                 | 3.91241            | 46.4887            | 11.8824                                                                                                                                                                                                                                                                                                          |                                                                                                                                                                                                                                                                                                                                                                        |
|                                           | Lox                                                | lysyl oxidase                                              | NM_010728                 | 15.7785            | 47.832             | 3.0315                                                                                                                                                                                                                                                                                                           | extracellular copper enzyme; homozygotes show aneurysms, cardiovascular dysfunction, abnormal development in respiratory system                                                                                                                                                                                                                                        |
|                                           | Ddr2                                               | discoidin domain receptor family, member 2                 | NM_022563                 | 4.03508            | 23.323             | 5.7801                                                                                                                                                                                                                                                                                                           | receptor tyrosine kinase; stomach, mandible, maxilla; homozygotes null show dwarfism                                                                                                                                                                                                                                                                                   |
|                                           | Fgf17                                              | fibroblast growth factor 17                                | NM_008004                 | 0.146433           | 0.647443           | 4.4214                                                                                                                                                                                                                                                                                                           | fibroblast growth factor; brain, liver; homozygotes show tissue loss in brain but appear normal and healthy                                                                                                                                                                                                                                                            |
|                                           | Fgf20                                              | fibroblast growth factor 20                                | NM_030610                 | 0.0221892          | 0.239664           | 10.8009                                                                                                                                                                                                                                                                                                          | fibroblast growth factor; heart; homozygotes knock-out show impaired hearing                                                                                                                                                                                                                                                                                           |
| Fgfr4                                     | fibroblast growth factor receptor 4                | NM_008011                                                  | 0.214097                  | 0.598013           | 2.7932             | fibroblast growth factor receptor, cluster of differentiation; skeletal muscles; homozygotes mutant are viable and healthy                                                                                                                                                                                       |                                                                                                                                                                                                                                                                                                                                                                        |
| Fibroblast-enriched transcription factors | Tcf21                                              | transcription factor 21                                    | NM_011545                 | 27.1981            | 426.376            | 15.6767                                                                                                                                                                                                                                                                                                          | transcription factor; gonad, heart; homozygotes null show hypoplastic lungs, respiratory failure during birth, abnormal vasculature to kidneys, asplenic, sex reversal                                                                                                                                                                                                 |
|                                           | Sox9                                               | SRY (sex determining region Y)-box 9                       | NM_011448                 | 3.8431             | 25.6219            | 6.6670                                                                                                                                                                                                                                                                                                           | transcription factor; gonad-testis; heterozygotes null/knock-out show hypoplasia, distorted skeletal structures, sex reversed                                                                                                                                                                                                                                          |
|                                           | Egr2                                               | early growth response 2                                    | NM_010118                 | 6.37275            | 40.9063            | 6.4189                                                                                                                                                                                                                                                                                                           | transcription factor; nervous system; homozygotes for targeted mutations exhibit absence of rhombomeres 3 and 5 of the hindbrain affecting axonal migration, disrupted myelination of Schwann cells, slow respiratory and jaw opening rhythms, skeletal abnormalities, and perinatal lethality                                                                         |
|                                           | Egr3                                               | early growth response 3                                    | NM_018781                 | 5.17897            | 51.9793            | 10.0366                                                                                                                                                                                                                                                                                                          | transcription factor; alimentary system, reproductive system; homozygotes null mutants exhibit partial postnatal lethality, sensory ataxia, resting tremors, blepharoptosis, scoliosis, muscle spindle agenesis, loss of myelinated proprioceptive neurons, and a defect in the strength of sensory-motor connections.                                                 |
|                                           | Foxc2                                              | forkhead box C2                                            | NM_013519                 | 7.32976            | 43.849             | 5.9823                                                                                                                                                                                                                                                                                                           | transcription factor; cardiovascular system and skeletal system; homozygotes for targeted null mutations die perinatally or before with cardiac abnormalities and skeletal defects in the neurocranium and spine. Heterozygotes exhibit lymphatic vessel and lymph node hyperplasia, anterior segment defects, and distichiasis.                                       |
|                                           | Twist1                                             | twist basic helix-loop-helix transcription factor 1        | NM_011658                 | 9.1558             | 47.7342            | 5.2135                                                                                                                                                                                                                                                                                                           | transcription factor; mesenchyme, heart, central nervous system, female reproductive system; homozygous embryos have neural tube defects and die around E11. Heterozygous mutants are viable and exhibit features of human Saethre-Chotzen syndrome, including hindlimb polydactyly, craniofacial defects, long bone abnormalities, an abnormal gait and a small size. |
|                                           | Twist2                                             | twist basic helix-loop-helix transcription factor 2        | NM_007855                 | 2.68178            | 28.679             | 10.6940                                                                                                                                                                                                                                                                                                          | transcription factor; skin, genitourinary system; deletion of this gene results in high postnatal lethality and progressive growth retardation is observed with adipose tissue deficiency, skin, hair and muscle abnormalities, as well as hematopoietic and lymphoid organ defects including the spleen, thymus, and liver.                                           |
|                                           | Msc                                                | musculin                                                   | NM_010827                 | 1.98787            | 79.7228            | 40.1046                                                                                                                                                                                                                                                                                                          | transcription factor; mesenchyme; mice homozygous for a targeted mutation are obtained at predicted Mendelian ratios and exhibit no obvious phenotypic abnormalities.                                                                                                                                                                                                  |
|                                           | Egr1                                               | early growth response 1                                    | NM_007913                 | 179.566            | 338.712            | 1.8863                                                                                                                                                                                                                                                                                                           | transcription factor; urinary system, mesenchyme; homozygotes for targeted mutations are small and infertile due to pituitary defects. Mutants exhibit reductions in somatotropins and growth hormone content, and a lack of luteinizing hormone-beta expression. Ovaries lack luteinizing hormone receptors. Memory defects are also seen.                            |
|                                           | Jdp2                                               | Jun dimerization protein 2                                 | NM_001205052              | 6.98907            | 5.57828            | 0.7981                                                                                                                                                                                                                                                                                                           | transcription factor; skeletal system; central nervous system; mice homozygous for a null allele exhibit increased white adipose tissue differentiation, short tail, and enhanced wound healing due to increased cell proliferation.                                                                                                                                   |
|                                           |                                                    |                                                            | NM_001205053              | 1.44307            | 13.5624            | 9.3983                                                                                                                                                                                                                                                                                                           |                                                                                                                                                                                                                                                                                                                                                                        |
|                                           | NM_030887                                          | 23.8914                                                    | 35.899                    | 1.5026             |                    |                                                                                                                                                                                                                                                                                                                  |                                                                                                                                                                                                                                                                                                                                                                        |
| Myc                                       | myelocytomatosis oncogene                          | NM_001177352                                               | 92.3669                   | 147.965            | 1.6019             | transcription factor; skeletal system, mesenchyme; mutations affect growth and development of heart, pericardium, neural tube, vasculogenesis and erythropoiesis. Homozygous null mutants die by embryonic day 10.5. Heterozygotes have reduced body size and multiorgan hypoplasia; females have small litters. |                                                                                                                                                                                                                                                                                                                                                                        |
|                                           |                                                    | NM_001177353                                               | 33.9607                   | 65.6106            | 1.9320             |                                                                                                                                                                                                                                                                                                                  |                                                                                                                                                                                                                                                                                                                                                                        |

|      |                                            |              |         |         |        |                                                                                                                                                                                                                                                                                                                                                                                  |
|------|--------------------------------------------|--------------|---------|---------|--------|----------------------------------------------------------------------------------------------------------------------------------------------------------------------------------------------------------------------------------------------------------------------------------------------------------------------------------------------------------------------------------|
| Ski  | ski sarcoma viral oncogene homolog (avian) | NM_011385    | 58.948  | 89.7647 | 1.5228 | transcription factor; homozygous null embryos die during late gestation and exhibit neural tube defects, cardiovascular defects, craniofacial anomalies, and reduced skeletal muscle mass. Haploinsufficient mice have an increased susceptibility to tumorigenesis.                                                                                                             |
| Klf3 | Kruppel-like factor 3 (basic)              | NM_008453    | 42.7881 | 64.6036 | 1.5098 | transcription factor; cardiovascular system, genitourinary system, central nervous system; homozygous null mice display reduced viability, body size and white adipose tissue. Mice homozygous for a gene trap allele exhibit cardiac defects, reduced body size and abnormal red blood cells. Mice heterozygous for an ENU-induced allele exhibit lethality with heart defects. |
| Xbp1 | X-box binding protein 1                    | NM_001271730 | 8.23583 | 8.45557 | 1.0267 | transcription factor; genitourinary system, sensory system, nervous system; homozygous mutants exhibit markedly impaired liver development resulting in severe anemia, necrosis of cardiac myocytes, morphological abnormalities of the neural tube, and fetal death around embryonic day 14.                                                                                    |
|      |                                            | NM_013842    | 48.533  | 120.265 | 2.4780 |                                                                                                                                                                                                                                                                                                                                                                                  |
| Klf2 | Kruppel-like factor 2 (lung)               | NM_008452    | 58.655  | 142.908 | 2.4364 | Kruppel-like transcription factor; facial bones, rib; homozygotes null show anemia, craniofacial malformations, impaired hematopoiesis                                                                                                                                                                                                                                           |
