# Supplementary material
Source: PubMed Central journal article supplement (PMC4828257)
Supplement: NIHMS764289-supplement-4.pdf [file NIHMS764289-supplement-4.pdf]

| Genes  | Forward Primer            | Reverse Primer          |
|--------|---------------------------|-------------------------|
| Actb   | GGCTGTATTCCCCTCCATCG      | CCAGTTGGTAACAATGCCATGT  |
| Mef2c  | ACTCTCTGAAGGATGGGCAACATGA | AGGTATAGCACACACACACTGCA |
| Gata4  | CAGGACTGCCGCTTCGCTTC      | GCTTTCTGCCTGCTACACACCCA |
| Tbx5   | TCGGCATGGTGCCAGAGTGG      | GCTTCGCATCTGCGGGGTTTC   |
| Tnnt2  | ATGTCTGACGCCGAGGAGGTG     | TCAGGTTCAGCCCCACCAGC    |
| Myh6   | GCAGAACAGTAAAATTGAGGACG   | CGCAGCTTCTCCACCTTAG     |
| Pdgfra | TGTACGATCGGCCAGCCTCCTAC   | CCAGCAAAGTCAGACCCTCGGA  |
| Lox    | GATGCGCTGCGGAAGAAAAC      | GTACCCTGTGGTCATAGTCTCT  |
| Tcf1   | AAGGCAGATCCTGGCCAACG      | TGCTGTAGTTCCACACAAGCGGT |
| Egr2   | CAGCCTCTACCCGGTGGAAGA     | TTGATCATGCCATCTCCCGCCA  |
| Foxc2  | TACCAGTGCAGTATGCGGGCT     | GTGGTCCGACAGAGCCTCGT    |
| Sox9   | CAAGCCGACTCCCCACATTCC     | CGGACCCTGAGATTGCCAG     |
| Msc    | GCTTCCAGCTACATCGCGCAC     | TGGGCGTCCAGAGACCACGA    |
| Egr3   | GACTCGGTAGCCCATTACAATC    | ACTTTCCCAAGTAGGTCACGG   |
| Twist1 | TACGAGGAGCTGCAGACCCAGC    | GCTCAGCTTGTCCGAGGGCA    |
| Twist2 | GTGGACAGTCTGGGCACCAG      | TCGGGCTGCCATCTTCGCTC    |
| Egr1   | GGAGCCGAGCGAACAACCCT      | GCGGCCAGTATAGGTGATGGGAG |
| Jdp2   | TCCGCAACATTGGGGCGATGATTG  | TTGTTCCGGCATCTGGCTGC    |
| Ski    | GCTGCCTGGACGACGTGAAG      | ATGGAAGCTGGGGGCTCTGA    |
| Klf3   | CTAGAAGGCGTGCTGAAAG       | TGTAATTCGACGGGAAGGAC    |
| Xbp1   | AGCAGCAAGTGGTGGATTTG      | GAGTTTTCTCCCGTAAAAGCTGA |
