# Supplementary material
Source: PubMed Central journal article supplement (PMC4828257)
Supplement: NIHMS764289-supplement-5.pdf [file NIHMS764289-supplement-5.pdf]

| EntrezGene ID  | MGI symbol   | RefSeq mRNA | CF             | CM       | CF/CM    |           |
|----------------|--------------|-------------|----------------|----------|----------|-----------|
| <b>Tcf21</b>   | NM_011545    | 21412       | <b>426.376</b> | 27.1981  | 15.67668 | CF/CM>4.5 |
| <b>Nfkbiz</b>  | NM_001159394 | 80859       | <b>159.266</b> | 29.9678  | 5.314571 |           |
| <b>Basp1</b>   | NM_027395    | 70350       | <b>100.126</b> | 14.9302  | 6.706273 |           |
| <b>Creb3l1</b> | NM_011957    | 26427       | <b>91.4653</b> | 19.9548  | 4.583624 |           |
| <b>Msc</b>     | NM_010827    | 17681       | <b>79.7228</b> | 1.98787  | 40.10463 |           |
| <b>Egr3</b>    | NM_018781    | 13655       | <b>51.9793</b> | 5.17897  | 10.03661 |           |
| <b>Twist1</b>  | NM_011658    | 22160       | <b>47.7342</b> | 9.1558   | 5.213548 |           |
| <b>Aebp1</b>   | NM_009636    | 11568       | <b>45.1851</b> | 8.3239   | 5.428357 |           |
| <b>Foxc2</b>   | NM_013519    | 14234       | <b>43.849</b>  | 7.32976  | 5.982324 |           |
| <b>Egr2</b>    | NM_010118    | 13654       | <b>40.9063</b> | 6.37275  | 6.41894  |           |
| <b>Twist2</b>  | NM_007855    | 13345       | <b>28.679</b>  | 2.68178  | 10.69402 |           |
| <b>Sox9</b>    | NM_011448    | 20682       | <b>25.6219</b> | 3.8431   | 6.666988 |           |
| <b>Nfatc2</b>  | NM_001136073 | 18019       | <b>16.9752</b> | 2.00825  | 8.452732 |           |
| <b>Nfatc2</b>  | NM_010899    | 18019       | <b>16.1057</b> | 2.79206  | 5.768393 |           |
| <b>Jdp2</b>    | NM_001205053 |             | <b>13.5624</b> | 1.44307  | 9.398297 |           |
| Gli1           | NM_010296    | 14632       | 7.39123        | 1.14721  | 6.442787 |           |
| Ebf2           | NM_001276387 | 13592       | 5.25068        | 0.01819  | 288.6575 |           |
| Aff3           | NM_010678    | 16764       | 5.087          | 0.932103 | 5.457551 |           |
| Spic           | NM_011461    | 20728       | 4.63           | 0.899993 | 5.144484 |           |
| Pknox2         | NM_148950    |             | 3.70604        | 0.456461 | 8.119073 |           |
| Gli2           | NM_001081125 | 14633       | 3.67544        | 0.602284 | 6.102503 |           |
| Nr1h4          | NM_001163504 | 20186       | 3.38369        | 0.45016  | 7.516639 |           |
| Foxp2          | NM_053242    | 114142      | 3.22803        | 0.593584 | 5.438203 |           |
| Osr2           | NM_054049    | 107587      | 2.28643        | 0.413918 | 5.523872 |           |
| Foxp2          | NM_212435    | 114142      | 1.50067        | 0.325205 | 4.614535 |           |
| 1700003F12Rik  | NM_029305    | 75480       | 1.16932        | 0.257731 | 4.536978 |           |
| Nr1h4          | NM_009108    | 20186       | 1.06975        | 0.047532 | 22.50608 |           |
| Hmga1          | NM_001166539 |             | 1.03334        | 0.00222  | 465.4706 |           |
| Tcf15          | NM_178254    | 277353      | 0.738721       | 0.104286 | 7.083607 |           |
| Gtf2i          | NM_001080748 | 14886       | 0.65361        | 0.002716 | 240.6233 |           |
| Foxf2          | NM_010225    | 14238       | 0.569276       | 0.118714 | 4.795357 |           |
| Irf5           | NM_001252382 |             | 0.399794       | 0.068809 | 5.810174 |           |
| Bnc2           | NM_172870    | 242509      | 0.360409       | 0.059908 | 6.016001 |           |
| Btbd11         | NM_001017525 | 74007       | 0.354478       | 0.078336 | 4.525114 |           |
| Foxd4          | NM_008022    | 14237       | 0.287392       | 0.053272 | 5.394834 |           |
| Mxi1           | NM_001008543 | 17859       | 0.277481       | 0.055785 | 4.974142 |           |
| Zfp169         | NM_001164575 | 67911       | 0.271234       | 0.000222 | 1219.61  |           |
| Runx1          | NM_001111021 | 12394       | 0.253639       | 0.045875 | 5.528867 |           |
| Ar             | NM_013476    | 11835       | 0.241384       | 0.051188 | 4.715646 |           |
| Zbtb25         | NM_001172104 | 109929      | 0.215899       | 5.49E-05 | 3932.587 |           |
| Zfp819         | NM_028913    | 74400       | 0.200985       | 0.034453 | 5.833684 |           |
| Trank1         | NM_001164659 | 320429      | 0.189278       | 0.021446 | 8.82596  |           |
| Tfap2c         | NM_009335    |             | 0.098067       | 6.79E-07 | 144429   |           |
| Elf3           | NM_001163131 | 13710       | 0.097572       | 4.12E-05 | 2368.248 |           |
| Zfp398         | NM_173034    | 272347      | 0.086389       | 3.95E-05 | 2187.073 |           |

|              |              |        |                |          |          |
|--------------|--------------|--------|----------------|----------|----------|
| Tbx4         | NM_172798    | 21387  | 0.085884       | 4.63E-07 | 185495.2 |
| Dlx5         | NM_198854    | 13395  | 0.065453       | 5.91E-06 | 11075.03 |
| Hmx1         | NM_010445    | 15371  | 0.065278       | 0.014439 | 4.521041 |
| Tfap2a       | NM_001122948 | 21418  | 0.062495       | 3.43E-06 | 18220    |
| Pou5f2       | NM_029315    | 75507  | 0.047549       | 0.007886 | 6.029467 |
| Hsf4         | NM_001256044 | 26386  | 0.045405       | 0.000696 | 65.21158 |
| Obox6        | NM_145710    | 252830 | 0.037473       | 0.008286 | 4.52274  |
| Barhl1       | NM_001164186 | 54422  | 0.029311       | 3.55E-07 | 82565.07 |
| Ovol2        | NM_026924    | 107586 | 0.028388       | 1.13E-06 | 25121.68 |
| Nr1h5        | NM_201619    | 381463 | 0.024747       | 3.57E-06 | 6932.017 |
| Myt1l        | NM_001093778 | 17933  | 0.018324       | 8.81E-06 | 2079.955 |
| Trp73        | NM_011642    | 22062  | 0.011719       | 4.51E-06 | 2598.537 |
| Lhx9         | NM_001025565 | 16876  | 0.010216       | 2.46E-06 | 4152.846 |
| Nkx2-2       | NM_010919    | 18088  | 0.007739       | 1.43E-07 | 54119.65 |
| Nrl          | NM_008736    |        | 0.003035       | 6.44E-06 | 471.2981 |
| Nrl          | NM_001136074 |        | 0.002775       | 6.07E-06 | 457.2471 |
| Nrl          | NM_001271916 |        | 0.000468       | 1.84E-06 | 254.2603 |
| Homez        | NM_183174    |        | 0.000205       | 1.69E-05 | 12.12615 |
| Mef2b        | NM_008578    | 17259  | 0.000108       | 4.07E-06 | 26.61179 |
| Myt1l        | NM_008666    | 17933  | 4.26E-05       | 7.81E-06 | 5.454545 |
| <b>Atf4</b>  | NM_009716    | 11911  | <b>572.266</b> | 371.159  | 1.541835 |
| <b>Klf6</b>  | NM_011803    | 23849  | <b>516.878</b> | 249.579  | 2.071    |
| <b>Egr1</b>  | NM_007913    | 13653  | <b>338.712</b> | 179.566  | 1.886281 |
| <b>Fosb</b>  | NM_008036    | 14282  | <b>286.107</b> | 143.451  | 1.994458 |
| <b>Klf4</b>  | NM_010637    | 16600  | <b>281.943</b> | 99.9928  | 2.819633 |
| <b>Maff</b>  | NM_010755    |        | <b>219.631</b> | 96.4516  | 2.277111 |
| <b>Myc</b>   | NM_001177352 | 17869  | <b>147.965</b> | 92.3669  | 1.601927 |
| <b>Klf2</b>  | NM_008452    | 16598  | <b>142.908</b> | 58.655   | 2.436416 |
| <b>Id2</b>   | NM_010496    | 15902  | <b>122.891</b> | 46.6598  | 2.633766 |
| <b>Xbp1</b>  | NM_013842    | 22433  | <b>120.265</b> | 48.533   | 2.478005 |
| Tgif1        | NM_009372    |        | 98.8759        | 63.7557  | 1.550856 |
| Carhsp1      | NM_025821    | 52502  | 95.1137        | 59.7782  | 1.59111  |
| <b>Ski</b>   | NM_011385    | 20481  | <b>89.7647</b> | 58.948   | 1.522778 |
| Hmga1-rs1    | NM_001166476 | 111241 | 89.4957        | 55.7095  | 1.606471 |
| Erf          | NM_010155    | 13875  | 82.5314        | 40.8492  | 2.020392 |
| Creb3l2      | NM_178661    | 208647 | 74.4289        | 44.2629  | 1.681519 |
| Klf9         | NM_010638    | 16601  | 72.9505        | 39.8692  | 1.829746 |
| Ybx3         | NM_139117    | 56449  | 72.7311        | 31.4954  | 2.309261 |
| <b>Tbx20</b> | NM_194263    | 57246  | <b>70.3712</b> | 35.9039  | 1.959988 |
| Phf10        | NM_024250    | 72057  | 68.2648        | 41.9217  | 1.628388 |
| <b>Myc</b>   | NM_001177353 | 17869  | <b>65.6106</b> | 33.9607  | 1.931957 |
| <b>Klf3</b>  | NM_008453    | 16599  | <b>64.6036</b> | 42.7881  | 1.50985  |
| Gtf2f1       | NM_133801    | 98053  | 63.5118        | 39.8035  | 1.595634 |
| Hivep2       | NM_010437    |        | 59.5412        | 38.2889  | 1.555051 |
| Tfdp1        | NM_009361    | 21781  | 56.6035        | 36.7515  | 1.540168 |
| Phf13        | NM_172705    | 230936 | 56.5485        | 26.4224  | 2.140173 |

4.5>CF/CM>1.5

|               |              |        |         |         |          |
|---------------|--------------|--------|---------|---------|----------|
| Tsc22d3       | NM_010286    | 14605  | 56.5417 | 22.3766 | 2.526823 |
| Hmga1-rs1     | NM_001166477 | 111241 | 50.8942 | 31.8568 | 1.597593 |
| Cebpb         | NM_009883    | 12608  | 50.0985 | 24.5469 | 2.04093  |
| Smad1         | NM_008539    | 17125  | 50.0122 | 30.4898 | 1.640293 |
| Max           | NM_008558    | 17187  | 49.5082 | 27.6205 | 1.792444 |
| Sf1           | NM_001110791 | 22668  | 47.9898 | 29.5681 | 1.623026 |
| Rbpj          | NM_001080927 |        | 45.7479 | 18.8602 | 2.425632 |
| Arntl         | NM_007489    | 11865  | 41.602  | 19.5433 | 2.128709 |
| Wasl          | NM_028459    | 73178  | 39.99   | 25.3055 | 1.580289 |
| 2700081O15Rik | NM_175381    | 108899 | 39.413  | 26.1461 | 1.507414 |
| Zfp948        | NM_001002008 | 381066 | 39.3605 | 14.2814 | 2.756067 |
| Cbfb          | NM_001161458 | 12400  | 38.249  | 22.8175 | 1.676301 |
| Sh3pxd2b      | NM_177364    | 268396 | 38.0942 | 15.597  | 2.442406 |
| Foxp1         | NM_001197322 | 108655 | 37.492  | 18.64   | 2.011373 |
| Tbpl1         | NM_011603    | 237336 | 37.395  | 19.6405 | 1.903974 |
| Jdp2          | NM_030887    |        | 35.899  | 23.8914 | 1.502591 |
| Nop2          | NM_138747    | 110109 | 35.6365 | 20.3998 | 1.746904 |
| Arid4b        | NM_194262    | 94246  | 35.459  | 22.5042 | 1.575661 |
| Ahctf1        | NM_026375    | 226747 | 34.8338 | 22.1007 | 1.57614  |
| Ubp1          | NM_013699    | 22221  | 34.6254 | 17.2175 | 2.011059 |
| Klf16         | NM_078477    | 118445 | 34.0219 | 16.3998 | 2.074531 |
| Tsc22d2       | NM_001081229 | 72033  | 33.5631 | 19.7608 | 1.698469 |
| Zbtb7a        | NM_010731    | 16969  | 31.2096 | 20.1255 | 1.550749 |
| Zfp655        | NM_028298    | 72611  | 30.6585 | 19.3034 | 1.588244 |
| Glis2         | NM_031184    | 83396  | 30.4773 | 12.0882 | 2.521244 |
| Kdm5b         | NM_152895    | 75605  | 29.7175 | 14.2142 | 2.090691 |
| Ebf1          | NM_007897    | 13591  | 29.4058 | 11.8243 | 2.486896 |
| Tle3          | NM_001083928 | 21887  | 29.2654 | 15.6413 | 1.871034 |
| Nfatc1        | NM_001164109 | 18018  | 28.2776 | 8.30214 | 3.406062 |
| Fosl1         | NM_010235    | 14283  | 27.8538 | 7.53773 | 3.69525  |
| Zeb2          | NM_015753    |        | 27.1992 | 12.2439 | 2.221449 |
| Ccnt1         | NM_009833    | 12455  | 27.0883 | 17.4627 | 1.551209 |
| Cic           | NM_027882    | 71722  | 26.6656 | 15.7751 | 1.69036  |
| Spi1          | NM_011355    | 20375  | 26.3055 | 10.9818 | 2.395372 |
| Foxn2         | NM_180974    | 14236  | 26.1938 | 13.1836 | 1.986847 |
| Ell           | NM_007924    | 13716  | 25.7477 | 12.916  | 1.993473 |
| Pias2         | NM_001164169 | 17344  | 24.7981 | 16.1214 | 1.53821  |
| Creb5         | NM_172728    | 231991 | 24.7953 | 6.39332 | 3.878314 |
| Prdm2         | NM_001081355 | 110593 | 24.4141 | 13.9247 | 1.753295 |
| Zfp592        | NM_178707    | 233410 | 23.6893 | 15.1421 | 1.564466 |
| Atf6b         | NM_017406    | 12915  | 23.5597 | 14.8652 | 1.58489  |
| Mier3         | NM_172593    | 218613 | 22.8605 | 9.77285 | 2.339185 |
| Tle1          | NM_011599    | 21885  | 22.8279 | 13.9833 | 1.632512 |
| Zbtb1         | NM_178744    | 268564 | 22.4635 | 14.5968 | 1.538933 |
| Paxbp1        | NM_026110    | 67367  | 22.2606 | 12.3242 | 1.806251 |
| Mbd1          | NM_013594    | 17190  | 21.6506 | 14.3199 | 1.511924 |

|        |              |        |         |         |          |
|--------|--------------|--------|---------|---------|----------|
| Zfp281 | NM_177643    |        | 21.1754 | 13.2802 | 1.594509 |
| Tcf7l1 | NM_009332    | 21415  | 20.2872 | 9.74955 | 2.080835 |
| Cic    | NM_001110132 | 71722  | 19.9599 | 12.4193 | 1.607168 |
| Nr4a2  | NM_013613    |        | 19.9203 | 12.6518 | 1.574503 |
| Ank2   | NM_178655    | 109676 | 19.8309 | 8.9039  | 2.227215 |
| Rbfox2 | NM_001110828 | 93686  | 17.979  | 9.08569 | 1.978826 |
| Tcf12  | NM_001253864 | 21406  | 17.9562 | 5.00321 | 3.588936 |
| Pias2  | NM_008602    | 17344  | 17.6322 | 7.26602 | 2.426665 |
| Zfp771 | NM_177362    | 244216 | 17.313  | 9.09696 | 1.903163 |
| Tfe3   | NM_001105197 | 209446 | 17.2553 | 10.6482 | 1.62049  |
| Snip1  | NM_175246    | 76793  | 16.9048 | 11.1162 | 1.520736 |
| Tgif1  | NM_001164075 |        | 15.503  | 7.96075 | 1.94743  |
| Snai1  | NM_011427    | 20613  | 15.3043 | 5.35467 | 2.858122 |
| Med26  | NM_027485    | 70625  | 14.7796 | 8.68488 | 1.701762 |
| Zfp954 | NM_172738    | 232853 | 14.3862 | 8.06866 | 1.782973 |
| Per2   | NM_011066    | 18627  | 13.9687 | 5.32057 | 2.625414 |
| Meis3  | NM_008627    | 17537  | 13.536  | 3.74311 | 3.616244 |
| Etv5   | NM_023794    | 104156 | 13.3266 | 5.35512 | 2.488572 |
| Zbtb7b | NM_009565    |        | 13.27   | 5.46826 | 2.426732 |
| Irf5   | NM_012057    |        | 12.6644 | 5.1685  | 2.450305 |
| Zfp9   | NM_011763    | 22750  | 12.6531 | 4.66302 | 2.713499 |
| Zfp217 | NM_001033299 |        | 12.5825 | 7.0241  | 1.791333 |
| Foxp4  | NM_001110825 | 74123  | 12.5051 | 5.75662 | 2.172299 |
| Nfix   | NM_001081982 | 18032  | 12.3546 | 6.42492 | 1.922919 |
| Zhx3   | NM_177263    | 320799 | 12.1506 | 5.86758 | 2.070803 |
| Zbtb43 | NM_001025594 | 71834  | 12.0128 | 7.1003  | 1.691872 |
| Hmgxb3 | NM_178277    | 106894 | 11.7887 | 7.46974 | 1.578194 |
| Zfpm2  | NM_011766    | 22762  | 11.719  | 7.43193 | 1.576845 |
| Nfia   | NM_010905    | 18027  | 11.4764 | 5.81329 | 1.974166 |
| Nfatc1 | NM_198429    | 18018  | 11.4502 | 3.47308 | 3.296843 |
| Zfp263 | NM_148924    |        | 11.4346 | 7.3251  | 1.561016 |
| Foxs1  | NM_010226    | 14239  | 11.3745 | 6.27427 | 1.81288  |
| Zfp142 | NM_029888    | 77264  | 11.3358 | 5.51019 | 2.057243 |
| Rfx2   | NM_009056    | 19725  | 11.136  | 4.70119 | 2.368762 |
| Gli3   | NM_008130    | 14634  | 11.1282 | 3.2228  | 3.45296  |
| Ubp1   | NM_001083319 | 22221  | 10.8852 | 6.95338 | 1.565454 |
| Hmga1  | NM_016660    |        | 10.8404 | 5.35021 | 2.026163 |
| Hic1   | NM_001098203 | 15248  | 10.6408 | 3.51469 | 3.027522 |
| Rora   | NM_013646    | 19883  | 10.4895 | 4.30504 | 2.436563 |
| Rbm4b  | NM_025717    | 56275  | 10.4563 | 5.60586 | 1.865245 |
| Foxp4  | NM_028767    | 74123  | 10.3885 | 3.91176 | 2.65571  |
| Atf2   | NM_009715    | 11909  | 10.3877 | 6.18952 | 1.678272 |
| Cers6  | NM_172856    | 241447 | 10.1797 | 6.21017 | 1.639198 |
| Rbfox2 | NM_175387    | 93686  | 10.1746 | 3.66807 | 2.773829 |
| Zfp949 | NM_001163061 |        | 9.99625 | 5.66301 | 1.765183 |
| Rara   | NM_001176528 |        | 9.9361  | 6.57062 | 1.512201 |

|         |              |        |         |         |          |
|---------|--------------|--------|---------|---------|----------|
| Hmga2   | NM_010441    | 15364  | 9.91999 | 3.84081 | 2.582786 |
| Id4     | NM_031166    | 15904  | 9.88332 | 4.47916 | 2.206512 |
| Cebpa   | NM_007678    | 12606  | 9.86411 | 2.65017 | 3.722067 |
| Bcl6    | NM_009744    | 12053  | 9.7725  | 4.87484 | 2.004681 |
| Tgif1   | NM_001164077 |        | 9.75836 | 3.32841 | 2.931838 |
| Zfp110  | NM_022981    | 65020  | 9.71287 | 6.14792 | 1.579863 |
| Zxdc    | NM_173002    | 80292  | 9.68052 | 6.01833 | 1.608506 |
| Irf8    | NM_008320    | 15900  | 9.65534 | 6.12981 | 1.575145 |
| Tead3   | NM_011566    | 21678  | 9.64174 | 6.40124 | 1.50623  |
| Tbx20   | NM_020496    | 57246  | 9.53625 | 2.35682 | 4.046236 |
| Cdk7    | NM_009874    | 12572  | 9.52486 | 5.44602 | 1.748958 |
| Nfic    | NM_026756    | 18029  | 9.50649 | 5.39125 | 1.763318 |
| Foxc1   | NM_008592    | 17300  | 9.26307 | 4.13908 | 2.237954 |
| Ston1   | NM_029858    | 77057  | 8.20992 | 4.65716 | 1.76286  |
| Nr4a2   | NM_001139509 |        | 8.19399 | 5.01869 | 1.632695 |
| Nfatc1  | NM_001164110 | 18018  | 8.01972 | 3.42084 | 2.344372 |
| Zfp281  | NM_001160251 |        | 7.8365  | 4.03177 | 1.943687 |
| Zfp275  | NM_001160229 | 27081  | 7.78098 | 2.0234  | 3.845498 |
| Dmtf1   | NM_011806    | 23857  | 7.76869 | 4.07746 | 1.905277 |
| Tfe3    | NM_001105196 | 209446 | 7.70504 | 4.60229 | 1.674175 |
| Etv4    | NM_008815    | 18612  | 7.67446 | 2.74598 | 2.794798 |
| Sowahc  | NM_172939    | 268301 | 7.5797  | 3.80359 | 1.992775 |
| Nfatc1  | NM_016791    | 18018  | 7.49376 | 2.80422 | 2.672315 |
| Snai2   | NM_011415    | 20583  | 7.44111 | 4.05988 | 1.83284  |
| Brwd1   | NM_145125    | 93871  | 7.27087 | 3.66995 | 1.98119  |
| Prr3    | NM_145487    | 75210  | 7.27011 | 2.72316 | 2.669733 |
| Rarg    | NM_011244    | 19411  | 7.26284 | 2.61816 | 2.774025 |
| Dnajc1  | NM_007869    |        | 7.02988 | 4.04294 | 1.738804 |
| Zfp747  | NM_175560    | 269997 | 6.80374 | 3.97093 | 1.713387 |
| Arnt    | NM_009709    | 11863  | 6.72379 | 3.88942 | 1.728738 |
| Prrx1   | NM_011127    | 18933  | 6.68099 | 2.48775 | 2.685555 |
| Nfix    | NM_010906    | 18032  | 6.62963 | 3.17767 | 2.086318 |
| Mafb    | NM_010658    | 16658  | 6.56819 | 3.88658 | 1.689967 |
| Pknox1  | NM_016670    |        | 6.54561 | 3.83348 | 1.707485 |
| Foxp4   | NM_001110824 | 74123  | 6.47381 | 2.50658 | 2.582726 |
| Tsc22d4 | NM_029805    | 78829  | 6.45355 | 4.19315 | 1.53907  |
| Zfp593  | NM_024215    | 68040  | 6.36571 | 3.7162  | 1.712962 |
| Hmga1   | NM_001166540 |        | 6.31182 | 3.10175 | 2.034922 |
| Zbtb8a  | NM_028603    | 73680  | 6.17834 | 3.95332 | 1.562823 |
| Nrf1    | NM_001164226 | 18181  | 6.16744 | 3.89325 | 1.584137 |
| Tgif1   | NM_001164074 |        | 5.99712 | 2.72094 | 2.204062 |
| Etv1    | NM_007960    | 14009  | 5.98503 | 3.14622 | 1.902292 |
| Smarcc2 | NM_001114097 | 68094  | 5.9146  | 2.73863 | 2.159693 |
| Batf    | NM_016767    | 53314  | 5.69885 | 2.72649 | 2.090178 |
| Thap2   | NM_025780    | 66816  | 5.65255 | 3.46129 | 1.633076 |
| Tgif1   | NM_001164076 |        | 5.62385 | 3.22862 | 1.741874 |

|         |              |           |         |          |          |
|---------|--------------|-----------|---------|----------|----------|
| Pias3   | NM_001165949 | 229615    | 5.61096 | 3.1189   | 1.799019 |
| Zfp449  | NM_030139    | 78619     | 5.60124 | 2.0832   | 2.688767 |
| Zfp382  | NM_001081007 | 233060    | 5.46565 | 2.55361  | 2.140362 |
| Zfp334  | NM_178411    | 228876    | 5.4084  | 3.04864  | 1.774037 |
| Hmga1   | NM_001166544 |           | 5.40459 | 1.56928  | 3.443993 |
| Setbp1  | NM_053099    | 240427    | 5.13805 | 2.29603  | 2.237797 |
| Zfp57   | NM_001013745 |           | 5.09511 | 3.22979  | 1.577536 |
| Pou2f1  | NM_198932    | 18986     | 5.07091 | 3.01192  | 1.683614 |
| Tfec    | NM_031198    | 21426     | 5.06333 | 1.59061  | 3.183263 |
| Arid5a  | NM_145996    | 214855    | 4.89053 | 2.71469  | 1.801506 |
| Ebf3    | NM_010096    | 13593     | 4.85391 | 2.99211  | 1.622236 |
| Hmga1   | NM_001166535 |           | 4.70681 | 1.64514  | 2.861039 |
| Sall1   | NM_021390    | 58198     | 4.6929  | 2.33042  | 2.013757 |
| Pias2   | NM_001164168 | 17344     | 4.52373 | 2.30926  | 1.958952 |
| Tcf7l2  | NM_001142923 | 21416     | 4.40839 | 2.48064  | 1.777118 |
| Trps1   | NM_032000    | 83925     | 4.40467 | 1.91338  | 2.302036 |
| Zbtb34  | NM_001085507 | 241311    | 4.39132 | 2.7705   | 1.585028 |
| Sox11   | NM_009234    | 20666     | 4.36301 | 1.51971  | 2.870949 |
| Batf3   | NM_030060    | 381319    | 4.26611 | 2.26689  | 1.881922 |
| Arid5a  | NM_001172206 | 214855    | 4.22075 | 2.56824  | 1.643441 |
| Zfp354c | NM_013922    | 30944     | 4.12466 | 1.64362  | 2.509497 |
| Nfatc4  | NM_023699    | 73181     | 4.08508 | 2.10435  | 1.941255 |
| Rbpj    | NM_009035    |           | 4.07563 | 1.14868  | 3.548099 |
| Klf12   | NM_010636    | 16597     | 4.0424  | 2.5253   | 1.60076  |
| Rbak    | NM_001045482 |           | 3.93858 | 2.16168  | 1.822    |
| Pknox2  | NM_001029838 |           | 3.93757 | 0.984407 | 3.999941 |
| Zfx     | NM_011768    |           | 3.90621 | 2.55713  | 1.527576 |
| Zbtb34  | NM_001276332 | 241311    | 3.78792 | 2.20129  | 1.720773 |
| Zfp719  | NM_172482    | 210105    | 3.72685 | 1.76711  | 2.109008 |
| Zfp821  | NM_029468    | 75871     | 3.6825  | 2.10416  | 1.750105 |
| Sp140   | NM_001013817 | 434484    | 3.6501  | 2.23542  | 1.632848 |
| Prrx2   | NM_009116    | 20204     | 3.60261 | 2.26724  | 1.588985 |
| Zglp1   | NM_001103168 | 100009600 | 3.59492 | 1.15065  | 3.124252 |
| Tead3   | NM_001098226 | 21678     | 3.57961 | 1.20881  | 2.961268 |
| Prrx1   | NM_175686    | 18933     | 3.55285 | 1.9611   | 1.811662 |
| Phtf1   | NM_001163467 | 18685     | 3.50466 | 1.86643  | 1.877734 |
| Zfp618  | NM_028326    | 72701     | 3.43066 | 1.51005  | 2.271885 |
| Nfatc4  | NM_001168346 | 73181     | 3.31699 | 1.7703   | 1.873688 |
| Zxdc    | NM_030260    | 80292     | 3.20905 | 1.79642  | 1.786358 |
| Zbtb20  | NM_019778    |           | 3.15186 | 1.8558   | 1.698383 |
| Aff1    | NM_001080798 | 17355     | 2.98637 | 1.69832  | 1.758426 |
| Nr6a1   | NM_010264    |           | 2.64321 | 1.19443  | 2.212947 |
| Maf     | NM_001025577 | 17132     | 2.58533 | 1.60701  | 1.608783 |
| Sp110   | NM_030194    | 109032    | 2.58252 | 1.37382  | 1.87981  |
| Tcf12   | NM_001253865 | 21406     | 2.55936 | 1.40641  | 1.819782 |
| Nfatc1  | NM_001164111 | 18018     | 2.53444 | 0.999515 | 2.53567  |

|               |              |        |          |          |          |
|---------------|--------------|--------|----------|----------|----------|
| Gtf2ird1      | NM_001081462 | 57080  | 2.49607  | 1.36101  | 1.833984 |
| Tcf7l2        | NM_001142921 | 21416  | 2.49193  | 0.889687 | 2.800906 |
| 9130019O22Rik | NM_030226    | 78921  | 2.46757  | 1.61402  | 1.528835 |
| Prrx1         | NM_001025570 | 18933  | 2.4516   | 0.881971 | 2.779683 |
| Tfe3          | NM_001271490 | 209446 | 2.4358   | 0.679583 | 3.584257 |
| Zbtb43        | NM_027947    | 71834  | 2.42387  | 1.11478  | 2.174303 |
| Nfatc2        | NM_001037178 | 18019  | 2.40909  | 1.10339  | 2.183353 |
| Myrf          | NM_001033481 | 225908 | 2.32461  | 1.34452  | 1.728952 |
| Pias2         | NM_001164167 | 17344  | 2.20037  | 1.16691  | 1.885638 |
| Meis2         | NM_001159568 | 17536  | 2.19939  | 1.29824  | 1.694132 |
| Gtf2ird1      | NM_001081466 | 57080  | 2.11859  | 1.36158  | 1.555979 |
| Tfe3          | NM_001271491 | 209446 | 1.99557  | 0.629128 | 3.171962 |
| Zfhx3         | NM_007496    | 11906  | 1.98695  | 1.20292  | 1.651772 |
| Hic1          | NM_010430    | 15248  | 1.94635  | 0.479052 | 4.06292  |
| Nfatc1        | NM_001164112 | 18018  | 1.90882  | 1.07554  | 1.774755 |
| Fbxw7         | NM_001177774 | 50754  | 1.87279  | 0.981019 | 1.909025 |
| Tcf7l2        | NM_001142920 | 21416  | 1.87276  | 0.967056 | 1.936558 |
| Hivep3        | NM_010657    | 16656  | 1.85771  | 0.714185 | 2.601161 |
| Zfp57         | NM_001168502 |        | 1.72901  | 0.692397 | 2.497137 |
| Runx1         | NM_001111023 | 12394  | 1.72672  | 0.975405 | 1.77026  |
| Arntl         | NM_001243048 | 11865  | 1.70398  | 0.664889 | 2.562804 |
| Hmga1         | NM_001166542 |        | 1.70075  | 0.739804 | 2.29892  |
| Irf7          | NM_016850    | 54123  | 1.60028  | 0.972672 | 1.645241 |
| Shox2         | NM_013665    |        | 1.59662  | 0.570563 | 2.798324 |
| Irf9          | NM_001159418 | 16391  | 1.55269  | 0.622002 | 2.496278 |
| Ankrd2        | NM_020033    | 56642  | 1.53638  | 0.446826 | 3.43843  |
| Six2          | NM_011380    | 20472  | 1.50058  | 0.458399 | 3.273524 |
| Zfp583        | NM_001033249 |        | 1.38595  | 0.372042 | 3.725251 |
| Sox8          | NM_011447    | 20681  | 1.38154  | 0.655206 | 2.108558 |
| Cbfb          | NM_001161457 | 12400  | 1.35081  | 0.705421 | 1.914899 |
| Meis2         | NM_001136072 | 17536  | 1.27887  | 0.719654 | 1.777062 |
| Mllt10        | NM_001252561 | 17354  | 1.24991  | 0.781847 | 1.598663 |
| Zkscan5       | NM_001167944 | 22757  | 1.2102   | 0.480123 | 2.520604 |
| Foxf1         | NM_010426    | 15227  | 1.18605  | 0.774991 | 1.530405 |
| Gtf2ird1      | NM_001081465 | 57080  | 1.14896  | 0.759606 | 1.512574 |
| Ebf3          | NM_001113415 | 13593  | 1.14345  | 0.434595 | 2.63107  |
| Zbtb32        | NM_021397    | 58206  | 1.1421   | 0.511468 | 2.232984 |
| Glis3         | NM_175459    | 226075 | 1.13759  | 0.535841 | 2.122999 |
| Npas3         | NM_013780    | 27386  | 1.13663  | 0.253589 | 4.482174 |
| Nfia          | NM_001122953 | 18027  | 1.10938  | 0.479755 | 2.312389 |
| Arnt2         | NM_007488    | 11864  | 1.10246  | 0.631829 | 1.744871 |
| Sox5          | NM_011444    | 20678  | 1.07618  | 0.259434 | 4.148184 |
| Ank1          | NM_031158    | 11733  | 1.0227   | 0.637853 | 1.603347 |
| 5730507C01Rik | NM_001033157 | 236366 | 0.957411 | 0.55832  | 1.714807 |
| Zbtb18        | NM_013915    | 30928  | 0.946895 | 0.415371 | 2.279637 |
| Nfix          | NM_001081981 | 18032  | 0.944128 | 0.314004 | 3.006739 |

|         |              |        |          |          |          |
|---------|--------------|--------|----------|----------|----------|
| Mkl1    | NM_153049    | 223701 | 0.932814 | 0.621833 | 1.500104 |
| Zfp956  | NM_178898    | 101197 | 0.922124 | 0.517454 | 1.782041 |
| Ebf4    | NM_001110513 | 228598 | 0.886484 | 0.41322  | 2.145308 |
| Zfp467  | NM_020589    |        | 0.881545 | 0.463295 | 1.902773 |
| Tbx21   | NM_019507    | 57765  | 0.878624 | 0.458023 | 1.918297 |
| Arntl2  | NM_172309    | 272322 | 0.829393 | 0.381395 | 2.17463  |
| Camk4   | NM_009793    | 12326  | 0.82449  | 0.361065 | 2.283495 |
| Tbx6    | NM_011538    | 21389  | 0.805186 | 0.512596 | 1.5708   |
| Btbd11  | NM_028709    | 74007  | 0.803899 | 0.444007 | 1.810555 |
| Zfp219  | NM_001253696 |        | 0.79624  | 0.372643 | 2.136737 |
| Foxp1   | NM_001197321 | 108655 | 0.795134 | 0.397946 | 1.998095 |
| Runx1t1 | NM_001111026 | 12395  | 0.794845 | 0.464747 | 1.710275 |
| Nr6a1   | NM_001159549 |        | 0.794668 | 0.202372 | 3.926769 |
| Irf7    | NM_001252600 | 54123  | 0.794254 | 0.463817 | 1.71243  |
| Hes7    | NM_033041    | 84653  | 0.790298 | 0.462625 | 1.708291 |
| Sox5    | NM_001243163 | 20678  | 0.785465 | 0.367927 | 2.134839 |
| Runx1t1 | NM_009822    | 12395  | 0.772005 | 0.328835 | 2.347697 |
| Pias2   | NM_001164170 | 17344  | 0.734031 | 0.359083 | 2.044182 |
| Tbx1    | NM_011532    | 21380  | 0.728763 | 0.186303 | 3.911708 |
| Zkscan1 | NM_029869    | 74570  | 0.703673 | 0.461362 | 1.525208 |
| Setdb1  | NM_001163641 | 84505  | 0.687981 | 0.349944 | 1.965975 |
| Pbx4    | NM_001024954 |        | 0.66819  | 0.2052   | 3.256287 |
| Dpf1    | NM_013874    | 29861  | 0.627578 | 0.238186 | 2.634823 |
| Zfp764  | NM_001167832 | 233893 | 0.596172 | 0.281206 | 2.120054 |
| Papalb  | NM_019943    | 56522  | 0.566849 | 0.196051 | 2.891334 |
| Pou2f3  | NM_011139    | 18988  | 0.531441 | 0.291457 | 1.823394 |
| Zfp575  | NM_001033205 | 101544 | 0.528479 | 0.131431 | 4.020962 |
| Zfhx4   | NM_030708    | 80892  | 0.515102 | 0.176047 | 2.925935 |
| Etv1    | NM_001163154 | 14009  | 0.503602 | 0.327736 | 1.536609 |
| Crem    | NM_001110857 | 12916  | 0.476076 | 0.317106 | 1.501315 |
| Runx2   | NM_001145920 | 12393  | 0.441305 | 0.15649  | 2.82002  |
| Spdef   | NM_013891    |        | 0.43535  | 0.186844 | 2.330019 |
| Ascl3   | NM_020051    | 56787  | 0.423238 | 0.126349 | 3.349753 |
| Neurog2 | NM_009718    | 11924  | 0.422596 | 0.094342 | 4.479409 |
| Glis1   | NM_147221    | 230587 | 0.422511 | 0.215401 | 1.961509 |
| Zfp219  | NM_001253694 |        | 0.409479 | 0.173381 | 2.361729 |
| Fiz1    | NM_011813    |        | 0.408358 | 0.224494 | 1.819015 |
| Tulp1   | NM_021478    | 22157  | 0.39561  | 0.152363 | 2.596497 |
| En2     | NM_010134    | 13799  | 0.388262 | 0.126149 | 3.077805 |
| Zfp839  | NM_028365    | 72805  | 0.38238  | 0.22408  | 1.706444 |
| Ankra2  | NM_001271390 | 68558  | 0.367629 | 0.232027 | 1.584423 |
| Mpl     | NM_001122949 | 17480  | 0.363738 | 0.104625 | 3.476588 |
| Foxd1   | NM_008242    | 15229  | 0.35846  | 0.134861 | 2.657996 |
| Satb2   | NM_139146    | 212712 | 0.357564 | 0.237713 | 1.504184 |
| Runx3   | NM_019732    | 12399  | 0.351277 | 0.191968 | 1.829873 |
| Ehmt1   | NM_001012518 | 77683  | 0.336736 | 0.1895   | 1.776971 |



|               |              |        |          |          |          |
|---------------|--------------|--------|----------|----------|----------|
| Zfp811        | NM_183177    | 240063 | 0.317164 | 0.114689 | 2.765427 |
| Runx2         | NM_001271630 | 12393  | 0.305407 | 0.138529 | 2.204643 |
| Dmrta2        | NM_172296    | 242620 | 0.293001 | 0.149488 | 1.96003  |
| Creb3l3       | NM_145365    | 208677 | 0.292404 | 0.182786 | 1.599707 |
| Tcf23         | NM_053085    | 69852  | 0.291851 | 0.189076 | 1.543564 |
| Tlx3          | NM_019916    | 27140  | 0.288554 | 0.085104 | 3.390624 |
| Pou2f2        | NM_001163556 | 18987  | 0.287769 | 0.175894 | 1.636036 |
| Cbfb          | NM_001161456 | 12400  | 0.269476 | 0.130857 | 2.059317 |
| Zbtb8b        | NM_153541    | 215627 | 0.267896 | 0.130036 | 2.060168 |
| Tfdp2         | NM_001184709 | 211586 | 0.258914 | 0.071881 | 3.601981 |
| Crem          | NM_001271504 | 12916  | 0.246605 | 0.119978 | 2.055418 |
| Rorb          | NM_001043354 | 225998 | 0.235531 | 0.101598 | 2.318264 |
| Prdm14        | NM_001081209 | 383491 | 0.227928 | 0.087663 | 2.600057 |
| Zfp2          | NM_001044697 |        | 0.212189 | 0.067672 | 3.135574 |
| Onecut2       | NM_194268    | 225631 | 0.199742 | 0.060583 | 3.296981 |
| Myb           | NM_001198914 | 17863  | 0.199207 | 0.077958 | 2.555302 |
| Gbx1          | NM_015739    | 231044 | 0.193062 | 0.04521  | 4.270338 |
| Bsx           | NM_178245    | 244813 | 0.186436 | 0.109715 | 1.699275 |
| Sox5          | NM_001113559 | 20678  | 0.184417 | 0.048298 | 3.818355 |
| Ascl2         | NM_008554    | 17173  | 0.181661 | 0.053585 | 3.390146 |
| L3mbtl1       | NM_001081338 | 241764 | 0.181435 | 0.075338 | 2.408283 |
| Pou2f2        | NM_001163554 | 18987  | 0.173534 | 0.097726 | 1.775716 |
| Zfp239        | NM_001001792 |        | 0.170403 | 0.053094 | 3.209447 |
| Aebp2         | NM_178803    | 11569  | 0.166726 | 0.098417 | 1.694084 |
| Tal2          | NM_009317    | 21350  | 0.164622 | 0.089291 | 1.843661 |
| Zfp941        | NM_001001180 | 407812 | 0.161197 | 0.090359 | 1.783972 |
| Dlx3          | NM_010055    | 13393  | 0.155245 | 0.043633 | 3.557956 |
| Onecut3       | NM_139226    | 246086 | 0.146196 | 0.081165 | 1.801218 |
| Gfi1          | NM_010278    | 14581  | 0.140205 | 0.03763  | 3.725844 |
| Nr5a1         | NM_139051    |        | 0.138652 | 0.069529 | 1.994152 |
| Etv2          | NM_007959    | 14008  | 0.132888 | 0.055039 | 2.414451 |
| Runx1t1       | NM_001111027 | 12395  | 0.129559 | 0.050861 | 2.54731  |
| Irf1          | NM_001159393 | 16362  | 0.128801 | 0.081673 | 1.577031 |
| Sox15         | NM_009235    | 20670  | 0.128    | 0.049914 | 2.564416 |
| Zfp710        | NM_001146000 | 209225 | 0.127771 | 0.075797 | 1.685709 |
| Hoxd9         | NM_013555    | 15438  | 0.116778 | 0.03002  | 3.890058 |
| Pitx3         | NM_008852    | 18742  | 0.114523 | 0.039986 | 2.864106 |
| Gtf2ird1      | NM_001081468 | 57080  | 0.109101 | 0.071652 | 1.522647 |
| 4931423N10Rik | NM_027635    | 70981  | 0.10875  | 0.040432 | 2.689728 |
| Sox10         | NM_011437    | 20665  | 0.105719 | 0.049355 | 2.142012 |
| Foxd3         | NM_010425    | 15221  | 0.105575 | 0.039446 | 2.676471 |
| Cecr6         | NM_033567    | 94047  | 0.103512 | 0.05546  | 1.86642  |
| Nhlh1         | NM_010916    | 18071  | 0.103506 | 0.041671 | 2.483898 |
| Dlx2          | NM_010054    | 13392  | 0.100981 | 0.067079 | 1.505409 |
| Crx           | NM_001113330 | 12951  | 0.090927 | 0.03892  | 2.336238 |
| Esr1          | NM_007956    | 13982  | 0.089249 | 0.048856 | 1.826792 |

|         |              |           |          |          |          |
|---------|--------------|-----------|----------|----------|----------|
| Zscan10 | NM_001033425 | 332221    | 0.088855 | 0.030468 | 2.916329 |
| Tcf7l2  | NM_001142924 | 21416     | 0.076563 | 0.035526 | 2.155165 |
| Lhx9    | NM_010714    | 16876     | 0.069045 | 0.028639 | 2.410841 |
| Apol6   | NM_001163621 | 71939     | 0.067158 | 0.044426 | 1.511677 |
| Barx1   | NM_007526    | 12022     | 0.055025 | 0.016223 | 3.39185  |
| Dmrt2   | NM_145831    | 226049    | 0.053666 | 0.026734 | 2.007391 |
| Ascl1   | NM_008553    | 17172     | 0.052195 | 0.027733 | 1.882047 |
| Hes2    | NM_008236    | 15206     | 0.049457 | 0.01232  | 4.014302 |
| Barx2   | NM_013800    | 12023     | 0.04936  | 0.023831 | 2.071226 |
| Pax9    | NM_011041    |           | 0.045342 | 0.024097 | 1.881641 |
| Lhx5    | NM_008499    | 16873     | 0.045306 | 0.018812 | 2.408289 |
| Hmx3    | NM_008257    | 15373     | 0.042582 | 0.016141 | 2.638067 |
| Hoxd1   | NM_010467    | 15429     | 0.038686 | 0.017123 | 2.259308 |
| Dbx2    | NM_207533    | 223843    | 0.038057 | 0.009192 | 4.140455 |
| Sim1    | NM_011376    | 20464     | 0.035351 | 0.013432 | 2.63182  |
| Zfp345  | NM_001034900 | 545471    | 0.034382 | 0.011421 | 3.010393 |
| Tfap2a  | NM_011547    | 21418     | 0.034188 | 0.021506 | 1.589682 |
| Pou3f4  | NM_008901    | 18994     | 0.031837 | 0.01055  | 3.017563 |
| Sp9     | NM_001005343 | 381373    | 0.02749  | 0.010958 | 2.508541 |
| Onecut1 | NM_008262    | 15379     | 0.026401 | 0.017527 | 1.506282 |
| Hes3    | NM_008237    | 15207     | 0.026305 | 0.011643 | 2.259403 |
| Isl2    | NM_027397    | 104360    | 0.02596  | 0.017235 | 1.506232 |
| Arid3c  | NM_001252622 | 550619    | 0.024383 | 0.012939 | 1.884464 |
| Dlx4    | NM_007867    | 13394     | 0.022041 | 0.005853 | 3.765725 |
| Pax6    | NM_001244200 |           | 0.02193  | 0.009613 | 2.281403 |
| Runx1   | NM_001111022 | 12394     | 0.021112 | 0.011457 | 1.842674 |
| Spz1    | NM_030237    | 79401     | 0.02034  | 0.00675  | 3.01353  |
| Foxa3   | NM_008260    | 15377     | 0.019452 | 0.005167 | 3.764816 |
| Gm13051 | NM_001037926 | 626316    | 0.019098 | 0.010876 | 1.755951 |
| Sp7     | NM_130458    | 170574    | 0.017192 | 0.009135 | 1.882007 |
| Barhl2  | NM_001005477 | 104382    | 0.016951 | 0.009007 | 1.881964 |
| Uncx    | NM_013702    | 22255     | 0.015123 | 0.010043 | 1.505845 |
| Zfp534  | NM_001127188 | 100503584 | 0.013385 | 0.003557 | 3.762679 |
| Neurod1 | NM_010894    | 18012     | 0.012508 | 0.008309 | 1.505386 |
| Emx2    | NM_010132    | 13797     | 0.011972 | 0.003976 | 3.010592 |
| Ankef1  | NM_175667    | 319196    | 0.011384 | 0.007563 | 1.505188 |
| Dmbx1   | NM_001025567 | 140477    | 0.011325 | 0.005504 | 2.057709 |
| Tfap2b  | NM_009334    | 21419     | 0.008684 | 0.004505 | 1.927551 |
| Klf17   | NM_029416    | 75753     | 0.008482 | 0.002818 | 3.00936  |
| Hoxc10  | NM_010462    | 209448    | 0.008345 | 0.00554  | 1.50612  |
| Pax2    | NM_011037    | 18504     | 0.007628 | 0.003379 | 2.257461 |
| Msx3    | NM_010836    | 17703     | 0.006867 | 0.004561 | 1.5056   |
| Scrt2   | NM_001160410 | 545474    | 0.006756 | 0.002993 | 2.257156 |
| Zfp92   | NM_009566    | 22754     | 0.005204 | 0.00346  | 1.504101 |
| Fiz1    | NM_001110330 |           | 0.001113 | 0.000596 | 1.867845 |
| Zfp78   | NM_001112805 | 330463    | 4.67E-06 | 2.78E-06 | 1.679856 |

|         |              |        |          |          |          |           |
|---------|--------------|--------|----------|----------|----------|-----------|
| Myt1    | NM_001171680 | 17932  | 1.81E-06 | 6.74E-07 | 2.68546  |           |
| Myt1    | NM_008665    | 17932  | 5.65E-07 | 1.32E-07 | 4.280303 |           |
| Id3     | NM_008321    | 15903  | 390.511  | 278.235  | 1.403529 | CF/CM<1.5 |
| Ybx1    | NM_011732    | 22608  | 258.536  | 328.017  | 0.788179 |           |
| Junb    | NM_008416    | 16477  | 230.779  | 225.746  | 1.022295 |           |
| Snrpb   | NM_009225    | 20638  | 217.616  | 184.187  | 1.181495 |           |
| Fos     | NM_010234    | 14281  | 210.908  | 388.743  | 0.542538 |           |
| Atf3    | NM_007498    | 11910  | 200.514  | 236.409  | 0.848166 |           |
| Hmgn2   | NM_016957    | 15331  | 199.688  | 206.321  | 0.967851 |           |
| Jun     | NM_010591    | 16476  | 192.802  | 193.283  | 0.997511 |           |
| Hnrnpab | NM_010448    | 15384  | 192.71   | 141.488  | 1.362024 |           |
| Hmgb1   | NM_010439    | 15289  | 172.299  | 176.925  | 0.973853 |           |
| Tsc22d1 | NM_009366    | 21807  | 170.413  | 192.304  | 0.886165 |           |
| Ets1    | NM_011808    | 23871  | 162.933  | 125.055  | 1.302891 |           |
| Jund    | NM_010592    | 16478  | 151.262  | 110.411  | 1.36999  |           |
| Ewsr1   | NM_007968    | 14030  | 147.021  | 112.431  | 1.307655 |           |
| Ybx3    | NM_011733    | 56449  | 142.267  | 99.8938  | 1.424182 |           |
| Rbm39   | NM_133242    | 170791 | 139.829  | 107.112  | 1.305447 |           |
| Litaf   | NM_019980    | 56722  | 138.91   | 146.482  | 0.948308 |           |
| Nedd8   | NM_008683    | 18002  | 138.899  | 186.397  | 0.745178 |           |
| Nfe2l2  | NM_010902    | 18024  | 132.354  | 119.037  | 1.111873 |           |
| Plagl1  | NM_009538    | 22634  | 131.714  | 103.483  | 1.272808 |           |
| Trim28  | NM_011588    | 21849  | 126.135  | 90.3083  | 1.396715 |           |
| Zfp36l1 | NM_007564    | 12192  | 122.116  | 94.9008  | 1.286775 |           |
| Mafk    | NM_010757    |        | 118.267  | 79.8894  | 1.480384 |           |
| Trp53   | NM_011640    | 22059  | 116.955  | 91.2948  | 1.28107  |           |
| Nr4a1   | NM_010444    | 15370  | 116.953  | 121.577  | 0.961966 |           |
| Cnbp    | NM_001109746 | 12785  | 114.374  | 91.477   | 1.250303 |           |
| Cdk4    | NM_009870    | 12567  | 111.677  | 93.4538  | 1.194997 |           |
| Sox4    | NM_009238    | 20677  | 102.256  | 93.3533  | 1.095366 |           |
| Nfkb1   | NM_008689    | 18033  | 97.7402  | 87.7323  | 1.114073 |           |
| Bhlhe40 | NM_011498    | 20893  | 97.6453  | 67.7574  | 1.441102 |           |
| Hbp1    | NM_153198    | 73389  | 96.7212  | 117.439  | 0.823587 |           |
| Dazap2  | NM_011873    | 23994  | 91.2396  | 133.147  | 0.685255 |           |
| Rela    | NM_009045    | 19697  | 87.2899  | 59.3763  | 1.470113 |           |
| Stat3   | NM_213659    | 20848  | 86.2149  | 64.9301  | 1.327811 |           |
| Bach1   | NM_007520    | 12013  | 84.4749  | 62.1366  | 1.359503 |           |
| Mta2    | NM_011842    | 23942  | 83.7445  | 57.1159  | 1.46622  |           |
| Nfil3   | NM_017373    | 18030  | 82.1174  | 60.0126  | 1.368336 |           |
| Mbd2    | NM_010773    | 17191  | 81.0561  | 78.0348  | 1.038717 |           |
| Id1     | NM_010495    | 15901  | 79.1633  | 84.3344  | 0.938683 |           |
| Maz     | NM_010772    | 17188  | 73.3784  | 61.3674  | 1.195723 |           |
| Mef2a   | NM_001033713 | 17258  | 70.879   | 84.1531  | 0.842262 |           |
| Hsbp1   | NM_024219    | 68196  | 69.6817  | 92.1428  | 0.756236 |           |
| Csde1   | NM_001161854 | 229663 | 68.6566  | 71.0001  | 0.966993 |           |
| Nfat5   | NM_018823    | 54446  | 66.7245  | 46.0956  | 1.447524 |           |

|         |              |        |         |         |          |
|---------|--------------|--------|---------|---------|----------|
| Yy1     | NM_009537    | 22632  | 66.3176 | 53.518  | 1.239164 |
| Cers2   | NM_029789    | 76893  | 63.0631 | 45.3971 | 1.389144 |
| Arid5b  | NM_023598    | 71371  | 62.1328 | 48.5231 | 1.280479 |
| Hmgb2   | NM_008252    | 97165  | 59.5437 | 68.7347 | 0.866283 |
| Sox7    | NM_011446    | 20680  | 58.9039 | 99.5577 | 0.591656 |
| Dek     | NM_025900    | 110052 | 58.8055 | 55.6701 | 1.056321 |
| Supt4a  | NM_009296    | 20922  | 57.9828 | 67.3576 | 0.86082  |
| Elf1    | NM_007920    |        | 57.8846 | 40.2609 | 1.437737 |
| Fosl2   | NM_008037    | 14284  | 54.7958 | 54.2308 | 1.010418 |
| Mbd3    | NM_013595    | 17192  | 54.754  | 54.645  | 1.001995 |
| Supt5   | NM_013676    | 20924  | 53.9499 | 42.6641 | 1.264527 |
| Hnrnpab | NM_001048061 | 15384  | 53.2959 | 50.101  | 1.063769 |
| Cbx3    | NM_007624    | 12417  | 52.4214 | 62.9724 | 0.83245  |
| Elf2    | NM_023502    |        | 52.3975 | 54.9076 | 0.954285 |
| Mxd4    | NM_010753    | 17122  | 52.2512 | 42.8456 | 1.219523 |
| Aff4    | NM_033565    | 93736  | 51.1897 | 37.5142 | 1.364542 |
| Aebp2   | NM_009637    | 11569  | 50.9174 | 42.5141 | 1.197659 |
| Smad4   | NM_008540    | 17128  | 50.4377 | 40.8456 | 1.234838 |
| Ldb1    | NM_001113408 | 16825  | 48.8064 | 42.9349 | 1.136754 |
| Ets2    | NM_011809    | 23872  | 48.0627 | 89.1486 | 0.53913  |
| Hif1a   | NM_010431    | 15251  | 47.7356 | 55.384  | 0.861902 |
| Peg3    | NM_008817    | 18616  | 47.4078 | 32.872  | 1.442194 |
| Gata6   | NM_010258    | 14465  | 46.9819 | 48.5751 | 0.967201 |
| Zfp146  | NM_011980    | 26465  | 46.5193 | 37.3958 | 1.243971 |
| Klf10   | NM_013692    | 21847  | 45.7293 | 34.9255 | 1.309338 |
| Adnp    | NM_009628    | 11538  | 45.0381 | 32.7637 | 1.374634 |
| Zdhhc5  | NM_144887    | 228136 | 44.4905 | 35.2549 | 1.261966 |
| Smarce1 | NM_020618    | 57376  | 44.4333 | 48.1164 | 0.923454 |
| Ddit3   | NM_007837    | 13198  | 44.1788 | 39.199  | 1.127039 |
| Srf     | NM_020493    | 20807  | 43.9669 | 49.2773 | 0.892234 |
| Gata4   | NM_008092    | 14463  | 43.4999 | 50.1872 | 0.866753 |
| Mafg    | NM_010756    | 17134  | 43.0358 | 35.4609 | 1.213613 |
| Baz1b   | NM_011714    | 22385  | 42.5946 | 33.1612 | 1.284471 |
| Zbtb2   | NM_001033466 | 381990 | 42.0283 | 31.3421 | 1.340954 |
| Vezf1   | NM_016686    | 22344  | 40.9223 | 31.4438 | 1.301443 |
| Nfe2l1  | NM_001130450 | 18023  | 40.2376 | 62.1449 | 0.64748  |
| Zfp664  | NM_001081750 | 269704 | 39.0151 | 44.3264 | 0.880178 |
| Creb3   | NM_013497    | 12913  | 38.4674 | 30.5705 | 1.258318 |
| Arid1a  | NM_001080819 | 93760  | 38.0437 | 32.1609 | 1.182918 |
| Lbh     | NM_029999    | 77889  | 37.8633 | 126.391 | 0.299573 |
| Atf1    | NM_007497    | 11908  | 36.7565 | 28.3942 | 1.294507 |
| Hes1    | NM_008235    | 15205  | 36.489  | 33.1648 | 1.100233 |
| Mef2d   | NM_133665    | 17261  | 36.3282 | 40.4387 | 0.898352 |
| Med4    | NM_026119    | 67381  | 36.281  | 27.8762 | 1.301505 |
| Thra    | NM_178060    | 21833  | 36.1915 | 44.2697 | 0.817523 |
| Taf10   | NM_020024    | 24075  | 35.091  | 46.7972 | 0.749853 |

|         |              |        |         |         |          |
|---------|--------------|--------|---------|---------|----------|
| Nfkb2   | NM_001177369 |        | 34.8782 | 31.3537 | 1.112411 |
| Epas1   | NM_010137    | 13819  | 34.8117 | 64.2346 | 0.541946 |
| Cdk2    | NM_016756    | 12566  | 34.7781 | 24.8768 | 1.398013 |
| Cers5   | NM_028015    | 71949  | 34.341  | 25.6636 | 1.338121 |
| Zmiz1   | NM_183208    | 328365 | 34.1914 | 34.6586 | 0.98652  |
| Nr1d2   | NM_011584    | 353187 | 33.7115 | 31.3904 | 1.073943 |
| Meox1   | NM_010791    | 17285  | 33.6292 | 32.8055 | 1.025109 |
| Tead2   | NM_011565    | 21677  | 33.3273 | 29.8723 | 1.115659 |
| Cdc5l   | NM_152810    | 71702  | 33.076  | 29.1059 | 1.136402 |
| Bcl6b   | NM_007528    | 12029  | 32.9222 | 49.1239 | 0.670187 |
| Zfp91   | NM_053009    | 109910 | 32.5808 | 37.6652 | 0.865011 |
| Smad7   | NM_001042660 | 17131  | 32.1034 | 24.9865 | 1.28483  |
| Relb    | NM_009046    | 19698  | 31.8927 | 35.0849 | 0.909015 |
| Elf4    | NM_019680    |        | 31.6625 | 21.2652 | 1.488935 |
| Nr3c1   | NM_008173    |        | 31.1777 | 28.1708 | 1.106738 |
| Srebf2  | NM_033218    | 20788  | 31.1546 | 28.4129 | 1.096495 |
| Eed     | NM_021876    | 13626  | 30.7219 | 26.2359 | 1.170987 |
| Tardbp  | NM_145556    | 230908 | 30.5596 | 22.2532 | 1.373268 |
| Nr1h2   | NM_009473    | 22260  | 30.535  | 27.3817 | 1.115161 |
| Phf2    | NM_011078    | 18676  | 30.1832 | 22.9275 | 1.316463 |
| Mta1    | NM_054081    | 116870 | 29.8856 | 22.107  | 1.351861 |
| Dpf2    | NM_011262    | 19708  | 29.5461 | 29.5616 | 0.999476 |
| Nfyc    | NM_008692    |        | 28.8789 | 32.5635 | 0.886849 |
| Prkrir  | NM_028410    | 72981  | 28.8398 | 30.9746 | 0.931079 |
| Mier1   | NM_001039081 |        | 28.6221 | 23.5031 | 1.217801 |
| Tcf4    | NM_001083967 | 21413  | 28.6201 | 37.4843 | 0.763522 |
| Hmgb3   | NM_008253    |        | 28.3395 | 53.9857 | 0.524945 |
| Nr1d1   | NM_145434    | 217166 | 28.1226 | 46.0969 | 0.610076 |
| Hcfc1   | NM_008224    | 15161  | 27.9625 | 24.4374 | 1.14425  |
| Naa15   | NM_053089    | 74838  | 27.8815 | 20.7508 | 1.343635 |
| Phf5a   | NM_026737    | 68479  | 27.6073 | 24.6951 | 1.117926 |
| Ruvbl1  | NM_019685    | 56505  | 26.8153 | 22.094  | 1.213691 |
| Erg     | NM_133659    | 13876  | 26.805  | 56.4757 | 0.474629 |
| Sox18   | NM_009236    | 20672  | 26.6702 | 70.2101 | 0.379863 |
| Mcm3    | NM_008563    | 17215  | 26.621  | 24.093  | 1.104927 |
| Sub1    | NM_011294    | 20024  | 26.3611 | 29.9135 | 0.881244 |
| E2f4    | NM_148952    | 104394 | 26.2658 | 26.3904 | 0.995279 |
| Ep300   | NM_177821    | 328572 | 26.2393 | 21.8294 | 1.202017 |
| Gatad2b | NM_139304    | 229542 | 25.9478 | 24.3263 | 1.066656 |
| Kdm5c   | NM_013668    | 20591  | 25.9405 | 27.6991 | 0.936511 |
| Irf1    | NM_008390    | 16362  | 25.8553 | 34.0846 | 0.758563 |
| Irf2    | NM_008391    | 16363  | 25.8253 | 27.5968 | 0.935808 |
| Rere    | NM_001085492 | 68703  | 25.3789 | 19.9405 | 1.272731 |
| Ccnk    | NM_009832    | 12454  | 25.294  | 17.337  | 1.458961 |
| Fem1c   | NM_173423    | 240263 | 25.175  | 25.4284 | 0.990035 |
| Cebpg   | NM_009884    | 12611  | 25.1489 | 19.6772 | 1.278073 |

|         |              |        |         |         |          |
|---------|--------------|--------|---------|---------|----------|
| Ssrp1   | NM_001136081 |        | 25.0894 | 23.294  | 1.077076 |
| Elk3    | NM_013508    | 13713  | 24.8842 | 32.9171 | 0.755966 |
| Klf13   | NM_021366    | 50794  | 24.5726 | 22.7628 | 1.079507 |
| Ssbp4   | NM_133772    | 76900  | 24.5482 | 25.5741 | 0.959885 |
| Sp3     | NM_001098425 | 20687  | 24.5049 | 19.0438 | 1.286765 |
| Tsc22d4 | NM_023910    | 78829  | 24.2241 | 46.2422 | 0.523853 |
| Sra1    | NM_025291    | 24068  | 23.9617 | 21.6962 | 1.104419 |
| Rcor1   | NM_198023    | 217864 | 23.7084 | 19.9674 | 1.187355 |
| Mlxip   | NM_133917    | 208104 | 23.3507 | 15.6553 | 1.491552 |
| Atf6    | NM_001081304 | 226641 | 23.1255 | 21.8179 | 1.059932 |
| Prdm4   | NM_181650    | 72843  | 23.0051 | 15.6933 | 1.465919 |
| Nfe2l1  | NM_008686    | 18023  | 22.9505 | 26.7527 | 0.857876 |
| Thap11  | NM_021513    | 59016  | 22.6299 | 22.319  | 1.01393  |
| Max     | NM_001146176 | 17187  | 22.5874 | 17.7135 | 1.275152 |
| Zfp260  | NM_011981    | 26466  | 22.3926 | 17.3298 | 1.292144 |
| Ctcf    | NM_181322    | 13018  | 22.1473 | 23.2696 | 0.95177  |
| Ssrp1   | NM_182990    |        | 22.0492 | 24.1242 | 0.913987 |
| Nr2f6   | NM_010150    | 13864  | 21.8826 | 23.4702 | 0.932357 |
| Ddx54   | NM_028041    | 71990  | 21.8735 | 19.4956 | 1.121971 |
| Otud4   | NM_001256033 | 73945  | 21.5508 | 19.0508 | 1.131228 |
| Foxj3   | NM_172699    | 230700 | 21.4239 | 19.9581 | 1.073444 |
| Zeb1    | NM_011546    | 21417  | 21.2371 | 20.6545 | 1.028207 |
| Sp1     | NM_013672    | 20683  | 21.0722 | 21.0838 | 0.99945  |
| Cdip1   | NM_025670    |        | 20.9941 | 29.8131 | 0.70419  |
| Gtf2b   | NM_145546    | 229906 | 20.9249 | 32.0484 | 0.652916 |
| Foxo1   | NM_019739    | 56458  | 20.9212 | 33.5785 | 0.623053 |
| Zfp367  | NM_175494    | 238673 | 20.8346 | 19.5858 | 1.06376  |
| Ubtf    | NM_001044383 | 21429  | 20.7403 | 17.6213 | 1.177002 |
| Zfp207  | NM_001130170 | 22680  | 20.714  | 15.0348 | 1.377737 |
| Clock   | NM_007715    | 12753  | 20.6322 | 16.2093 | 1.272862 |
| Cebpz   | NM_001024806 | 12607  | 20.6091 | 15.9577 | 1.291483 |
| Foxk2   | NM_001080932 | 68837  | 20.5526 | 15.4468 | 1.330541 |
| Tcf12   | NM_011544    | 21406  | 20.5207 | 19.3438 | 1.060841 |
| Usf1    | NM_009480    |        | 20.3313 | 23.5442 | 0.863538 |
| Ehmt2   | NM_147151    | 110147 | 20.29   | 14.2437 | 1.424489 |
| Smad3   | NM_016769    | 17127  | 20.1035 | 14.1092 | 1.42485  |
| Baz2a   | NM_054078    | 116848 | 20.0907 | 15.9447 | 1.260024 |
| Tcf4    | NM_013685    | 21413  | 19.9257 | 21.7647 | 0.915505 |
| Hand2   | NM_010402    | 15111  | 19.9067 | 20.9529 | 0.950069 |
| Hdac5   | NM_010412    | 15184  | 19.8887 | 23.1995 | 0.85729  |
| Gabpa   | NM_008065    | 14390  | 19.5899 | 21.6249 | 0.905896 |
| Tox4    | NM_023434    | 268741 | 19.4176 | 16.7026 | 1.16255  |
| Gatad1  | NM_026033    | 67210  | 19.0617 | 24.5903 | 0.775172 |
| Zfp787  | NM_001013012 | 67109  | 18.7975 | 14.3432 | 1.310551 |
| Drg1    | NM_007879    | 13494  | 18.7436 | 34.0359 | 0.550701 |
| Cux1    | NM_198602    | 13047  | 18.7147 | 18.7629 | 0.997431 |

|         |              |        |         |         |          |
|---------|--------------|--------|---------|---------|----------|
| Rest    | NM_011263    |        | 18.6874 | 15.7184 | 1.188887 |
| Hsf1    | NM_008296    | 15499  | 18.5833 | 16.9356 | 1.097292 |
| Trp53   | NM_001127233 | 22059  | 18.523  | 15.1529 | 1.222406 |
| Mcm4    | NM_008565    | 17217  | 18.4016 | 13.8036 | 1.333102 |
| Sp3     | NM_001018042 | 20687  | 18.2479 | 18.5004 | 0.986352 |
| Gata2   | NM_008090    |        | 18.1958 | 21.5409 | 0.844709 |
| Stag1   | NM_009282    | 20842  | 17.8958 | 15.3797 | 1.163599 |
| Mxd1    | NM_010751    | 17119  | 17.8955 | 15.9044 | 1.125192 |
| Zfp191  | NM_021559    | 59057  | 17.7649 | 18.0871 | 0.982186 |
| Arid2   | NM_175251    | 77044  | 17.6446 | 17.2056 | 1.025515 |
| Baz2b   | NM_001001182 | 407823 | 17.59   | 11.769  | 1.494604 |
| Smarcc1 | NM_009211    | 20588  | 17.4904 | 15.65   | 1.117597 |
| Acyp2   | NM_029344    | 75572  | 17.466  | 39.1696 | 0.445907 |
| Hsf2    | NM_008297    | 15500  | 17.4065 | 17.4321 | 0.998531 |
| Tmpo    | NM_001080129 | 21917  | 17.2745 | 23.8273 | 0.724988 |
| Nfib    | NM_008687    | 18028  | 17.2337 | 16.9622 | 1.016006 |
| Smad5   | NM_008541    |        | 17.1929 | 15.6617 | 1.097767 |
| Aebp2   | NM_001005605 | 11569  | 17.076  | 12.9599 | 1.317603 |
| Arnt    | NM_001037737 | 11863  | 17.072  | 11.6482 | 1.465634 |
| Rab11b  | NM_008997    | 19326  | 16.7659 | 24.3998 | 0.687133 |
| Smad6   | NM_008542    | 17130  | 16.7626 | 23.7268 | 0.706484 |
| Med20   | NM_020048    | 56771  | 16.6494 | 15.7499 | 1.057111 |
| Foxj2   | NM_021899    | 60611  | 16.5171 | 14.2439 | 1.159591 |
| Fli1    | NM_008026    | 14247  | 16.3788 | 26.099  | 0.627564 |
| E2f6    | NM_033270    | 50496  | 16.3748 | 15.8655 | 1.032101 |
| Etv3    | NM_001083318 | 27049  | 16.3548 | 11.5229 | 1.41933  |
| Nfya    | NM_001110832 | 18044  | 16.3289 | 12.2656 | 1.331276 |
| Mcm5    | NM_008566    | 17218  | 16.3195 | 18.8794 | 0.864408 |
| Pbx3    | NM_016768    | 18516  | 16.3146 | 12.3613 | 1.319813 |
| Klf11   | NM_178357    | 194655 | 16.2697 | 21.7846 | 0.746844 |
| Cbfb    | NM_022309    | 12400  | 16.2663 | 13.8714 | 1.17265  |
| Nr4a3   | NM_015743    | 18124  | 16.0984 | 14.5421 | 1.10702  |
| Hdgfrp2 | NM_008233    | 15193  | 15.9703 | 17.9985 | 0.887313 |
| Stat3   | NM_213660    | 20848  | 15.853  | 13.1222 | 1.208105 |
| Irf2bp1 | NM_178757    | 272359 | 15.8452 | 14.2166 | 1.114556 |
| Rexo4   | NM_207234    | 227656 | 15.8393 | 13.0953 | 1.209541 |
| Gmeb2   | NM_198169    | 229004 | 15.8382 | 11.954  | 1.324929 |
| Elk4    | NM_007923    | 13714  | 15.8314 | 13.2899 | 1.191235 |
| Sox13   | NM_011439    |        | 15.4416 | 13.0453 | 1.183691 |
| Nelfa   | NM_011914    | 24116  | 15.427  | 11.5087 | 1.340464 |
| Zbtb10  | NM_177660    | 229055 | 15.3896 | 11.7092 | 1.314317 |
| Klf7    | NM_033563    | 93691  | 15.3217 | 15.2799 | 1.002736 |
| Kank2   | NM_145611    | 235041 | 15.2016 | 15.6644 | 0.970455 |
| Ccnt2   | NM_028399    | 72949  | 15.1944 | 14.5666 | 1.043099 |
| Tef     | NM_017376    | 21685  | 15.1341 | 14.3627 | 1.053709 |
| Lmo2    | NM_001142335 | 16909  | 14.9455 | 17.0621 | 0.875947 |

|           |              |        |         |         |          |
|-----------|--------------|--------|---------|---------|----------|
| Tulp4     | NM_054040    | 68842  | 14.7068 | 12.3031 | 1.195374 |
| Zzz3      | NM_001080755 | 108946 | 14.7025 | 12.7842 | 1.150052 |
| Bcl3      | NM_033601    | 12051  | 14.6995 | 17.6618 | 0.832276 |
| Tcf12     | NM_001253862 | 21406  | 14.6383 | 13.9855 | 1.046677 |
| Tgif2     | NM_173396    | 228839 | 14.631  | 12.2513 | 1.194241 |
| Pias4     | NM_021501    | 59004  | 14.4101 | 14.6913 | 0.980859 |
| Pbxip1    | NM_146131    | 229534 | 14.3153 | 23.5902 | 0.606832 |
| Zfp410    | NM_144833    | 52708  | 14.1038 | 14.4782 | 0.97414  |
| Etv6      | NM_007961    |        | 14.0978 | 17.7693 | 0.79338  |
| Pias1     | NM_019663    | 56469  | 14.0525 | 11.2351 | 1.250768 |
| Wt1       | NM_144783    | 22431  | 14.0437 | 17.4543 | 0.804598 |
| Hmg20a    | NM_025812    | 66867  | 13.9522 | 15.0856 | 0.924869 |
| Mnt       | NM_010813    | 17428  | 13.9417 | 13.4927 | 1.033277 |
| Csde1     | NM_144901    | 229663 | 13.9274 | 18.0221 | 0.772796 |
| Kdm5a     | NM_145997    | 214899 | 13.8701 | 12.159  | 1.140727 |
| Ppard     | NM_011145    | 19015  | 13.865  | 15.228  | 0.910494 |
| Zfp335    | NM_199027    | 329559 | 13.8241 | 13.2566 | 1.042809 |
| Foxo4     | NM_018789    | 54601  | 13.7219 | 16.0359 | 0.855699 |
| Rara      | NM_009024    |        | 13.7156 | 11.2744 | 1.216526 |
| Nfe2l1    | NM_001130452 | 18023  | 13.6727 | 13.0474 | 1.047925 |
| Zfp871    | NM_172458    | 208292 | 13.6721 | 10.7881 | 1.267332 |
| Fiz1      | NM_001110329 |        | 13.6629 | 12.8442 | 1.063741 |
| Tead1     | NM_001166585 | 21676  | 13.6386 | 15.1792 | 0.898506 |
| Rfx7      | NM_001033536 | 319758 | 13.3606 | 11.3346 | 1.178745 |
| Foxn3     | NM_183186    |        | 13.3484 | 10.4538 | 1.276895 |
| Aff1      | NM_133919    | 17355  | 13.2744 | 12.1962 | 1.088405 |
| Ube2w     | NM_025773    | 66799  | 13.144  | 9.33352 | 1.408258 |
| Zfp384    | NM_175557    | 269800 | 13.1206 | 11.5694 | 1.134078 |
| Hivep1    | NM_007772    | 110521 | 13.1177 | 12.8486 | 1.020944 |
| Plagl2    | NM_018807    | 54711  | 13.0584 | 9.28691 | 1.406108 |
| Whsc1     | NM_001081102 | 107823 | 13.0433 | 9.23046 | 1.413072 |
| Nfkb2     | NM_019408    |        | 12.9982 | 11.6059 | 1.119965 |
| Atf2      | NM_001025093 | 11909  | 12.9932 | 10.4526 | 1.243059 |
| Erc2      | NM_007949    | 13871  | 12.8972 | 8.72996 | 1.477349 |
| E2f3      | NM_010093    | 13557  | 12.8789 | 8.65094 | 1.488728 |
| Thap4     | NM_025920    | 67026  | 12.8337 | 15.2508 | 0.84151  |
| Jarid2    | NM_001205043 |        | 12.8141 | 9.54525 | 1.342458 |
| Arid4a    | NM_001081195 | 238247 | 12.7406 | 10.3828 | 1.227087 |
| Stat6     | NM_009284    | 20852  | 12.6898 | 16.9266 | 0.749696 |
| Ubtf      | NM_011551    | 21429  | 12.5406 | 13.4384 | 0.933191 |
| Foxm1     | NM_008021    | 14235  | 12.517  | 9.19229 | 1.361685 |
| Mecom     | NM_007963    | 14013  | 12.4719 | 10.3527 | 1.2047   |
| Mcm2      | NM_008564    | 17216  | 12.4706 | 16.4179 | 0.759573 |
| Zfp46     | NM_009557    | 22704  | 12.4399 | 13.0966 | 0.949857 |
| Kidins220 | NM_001081378 | 77480  | 12.422  | 14.5407 | 0.854292 |
| Crem      | NM_001110855 | 12916  | 12.3983 | 10.7251 | 1.156008 |



|          |              |        |         |         |          |
|----------|--------------|--------|---------|---------|----------|
| Zfp362   | NM_001081098 | 230761 | 12.3872 | 12.8617 | 0.963108 |
| Dmtf1    | NM_001110327 | 23857  | 12.3287 | 8.57975 | 1.436953 |
| Nfya     | NM_010913    | 18044  | 12.3131 | 9.10722 | 1.352015 |
| Dnajc2   | NM_009584    | 22791  | 12.3105 | 17.27   | 0.712826 |
| Rxra     | NM_011305    | 20181  | 12.288  | 12.2348 | 1.004348 |
| Zfpm1    | NM_009569    | 22761  | 12.2611 | 13.0304 | 0.940961 |
| Zbed4    | NM_181412    | 223773 | 12.1453 | 10.3956 | 1.168312 |
| Gtf2i    | NM_001080749 | 14886  | 12.1387 | 16.4728 | 0.736894 |
| Taf6l    | NM_026325    | 225895 | 12.1115 | 8.43252 | 1.436285 |
| Pbx2     | NM_017463    | 18515  | 12.0844 | 15.9953 | 0.755497 |
| Etv3     | NM_012051    | 27049  | 12.0194 | 10.1482 | 1.184387 |
| Rps6ka4  | NM_019924    | 56613  | 11.9602 | 8.25643 | 1.448592 |
| Mga      | NM_013720    | 29808  | 11.9475 | 8.98802 | 1.329269 |
| Hey1     | NM_010423    | 15213  | 11.9384 | 19.4542 | 0.613667 |
| Taf4a    | NM_001081092 | 228980 | 11.8214 | 11.1961 | 1.05585  |
| Smad2    | NM_010754    | 17126  | 11.762  | 9.43153 | 1.247094 |
| Ncor1    | NM_001252313 | 20185  | 11.7284 | 13.1361 | 0.892837 |
| Gtf2i    | NM_010365    | 14886  | 11.6677 | 21.892  | 0.532966 |
| Zfx      | NM_001044386 |        | 11.6311 | 9.37837 | 1.240205 |
| Zfp513   | NM_175311    | 101023 | 11.6073 | 10.1531 | 1.143227 |
| Arid5a   | NM_001172205 | 214855 | 11.591  | 8.06875 | 1.43653  |
| Wiz      | NM_212438    | 22404  | 11.5833 | 9.83513 | 1.177748 |
| Terf2    | NM_009353    | 21750  | 11.4345 | 9.79519 | 1.167359 |
| Tsc22d1  | NM_207652    | 21807  | 11.4289 | 10.3433 | 1.104957 |
| Smarcc2  | NM_198160    | 68094  | 11.3536 | 16.119  | 0.704361 |
| Dedd2    | NM_207677    | 67379  | 11.2917 | 12.4825 | 0.904602 |
| Tbx18    | NM_023814    | 76365  | 11.1436 | 7.7385  | 1.440021 |
| Zcchc8   | NM_027494    | 70650  | 11.094  | 10.1474 | 1.093285 |
| Rbm4     | NM_009032    | 56275  | 11.0776 | 8.53593 | 1.297761 |
| Bmi1     | NM_007552    | 12151  | 11.0337 | 16.473  | 0.669805 |
| Zfp777   | NM_001081382 |        | 11.0259 | 8.35071 | 1.320355 |
| Zfp180   | NM_001045486 | 210135 | 11.0247 | 11.357  | 0.970741 |
| Pbrm1    | NM_001081251 | 66923  | 10.9823 | 13.6245 | 0.80607  |
| Ankrd54  | NM_144849    | 223690 | 10.9688 | 8.15322 | 1.345334 |
| Hlx      | NM_008250    | 15284  | 10.9141 | 24.4944 | 0.445575 |
| Mynn     | NM_030557    | 80732  | 10.9043 | 9.92401 | 1.09878  |
| Nfatc3   | NM_010901    | 18021  | 10.8725 | 11.1792 | 0.972565 |
| Rnf14    | NM_020012    | 56736  | 10.867  | 22.5173 | 0.482607 |
| Otud4    | NM_001081164 | 73945  | 10.7819 | 9.17823 | 1.174725 |
| Fbxw7    | NM_001177773 | 50754  | 10.7744 | 9.16697 | 1.17535  |
| Zfp212   | NM_145576    | 232784 | 10.7411 | 9.69236 | 1.108203 |
| Foxo3    | NM_019740    |        | 10.736  | 11.4935 | 0.934093 |
| Zfp868   | NM_172754    | 234362 | 10.7124 | 7.44649 | 1.438584 |
| Zkscan17 | NM_172941    | 268417 | 10.6417 | 12.4795 | 0.852734 |
| Brwd1    | NM_001103179 | 93871  | 10.6332 | 10.017  | 1.061515 |
| Med24    | NM_011869    | 23989  | 10.5202 | 13.19   | 0.797589 |

|          |              |        |         |         |          |
|----------|--------------|--------|---------|---------|----------|
| Taf7     | NM_175770    | 24074  | 10.4661 | 15.852  | 0.660238 |
| Ankib1   | NM_001003909 | 70797  | 10.4313 | 8.72068 | 1.196157 |
| Hinfp    | NM_172162    | 102423 | 10.4234 | 7.41984 | 1.404801 |
| Cnbp     | NM_001109745 | 12785  | 10.4018 | 10.2585 | 1.013969 |
| Rel      | NM_009044    | 19696  | 10.3764 | 9.07894 | 1.142909 |
| Zdhhc16  | NM_023740    | 74168  | 10.3299 | 9.5474  | 1.081959 |
| Rfx1     | NM_009055    | 19724  | 10.32   | 7.26239 | 1.42102  |
| Ankfy1   | NM_009671    | 11736  | 10.3047 | 10.4548 | 0.985643 |
| Zfp568   | NM_001167872 | 243905 | 10.2805 | 13.7509 | 0.747624 |
| Mkl1     | NM_001082536 | 223701 | 10.2265 | 7.08817 | 1.442756 |
| Zfp715   | NM_027264    |        | 10.1925 | 7.18904 | 1.417783 |
| Ncor2    | NM_001253904 | 20602  | 10.1775 | 8.81458 | 1.154621 |
| Hira     | NM_010435    | 15260  | 10.1757 | 11.0174 | 0.923603 |
| Ilf3     | NM_010561    | 16201  | 10.0627 | 10.2411 | 0.98258  |
| Ercc3    | NM_133658    | 13872  | 10.0386 | 12.9603 | 0.774565 |
| Srebf1   | NM_011480    | 20787  | 10.018  | 10.106  | 0.991292 |
| Hmg20b   | NM_001163166 | 15353  | 10.007  | 12.2785 | 0.815002 |
| Med17    | NM_144933    | 234959 | 9.98915 | 9.07837 | 1.100324 |
| Ldb1     | NM_010697    | 16825  | 9.93076 | 8.33939 | 1.190826 |
| Adnp2    | NM_175028    | 240442 | 9.91924 | 6.87551 | 1.442692 |
| Tcf3     | NM_001164151 | 21423  | 9.89228 | 14.5456 | 0.680087 |
| Tfam     | NM_009360    | 21780  | 9.87524 | 9.51121 | 1.038274 |
| Zfp644   | NM_026856    | 52397  | 9.86356 | 11.353  | 0.868806 |
| Trib3    | NM_175093    | 228775 | 9.77954 | 11.7613 | 0.831502 |
| Rnf14    | NM_001164622 | 56736  | 9.75568 | 13.9205 | 0.700814 |
| Nfic     | NM_008688    | 18029  | 9.68532 | 12.0948 | 0.800784 |
| Hhex     | NM_008245    | 15242  | 9.67764 | 25.1849 | 0.384264 |
| Zfp148   | NM_011749    | 22661  | 9.66769 | 9.65382 | 1.001437 |
| Stat3    | NM_011486    | 20848  | 9.66514 | 10.2234 | 0.945394 |
| Zfp800   | NM_001081678 |        | 9.65752 | 6.90602 | 1.398421 |
| Zhx1     | NM_009572    |        | 9.63107 | 7.46443 | 1.290262 |
| Helz     | NM_198298    | 78455  | 9.58501 | 8.47536 | 1.130927 |
| E2f1     | NM_007891    | 13555  | 9.57793 | 10.0515 | 0.952886 |
| Zfp358   | NM_080461    | 140482 | 9.57726 | 13.5532 | 0.706642 |
| Kat7     | NM_001195003 | 217127 | 9.31537 | 9.64413 | 0.965911 |
| Zbtb46   | NM_027656    | 72147  | 9.27712 | 8.54901 | 1.085169 |
| Zfp445   | NM_173364    | 235682 | 9.26102 | 10.1646 | 0.911105 |
| Hipk2    | NM_010433    | 15258  | 9.25033 | 8.86655 | 1.043284 |
| Mphosph8 | NM_023773    | 75339  | 9.24648 | 9.22865 | 1.001932 |
| Hmbbox1  | NM_177338    | 219150 | 9.24102 | 10.1752 | 0.908191 |
| Nsd1     | NM_008739    | 18193  | 9.19449 | 9.94102 | 0.924904 |
| Lmo2     | NM_008505    | 16909  | 9.17498 | 10.2513 | 0.895006 |
| Foxk1    | NM_199068    | 17425  | 9.16312 | 10.6817 | 0.857833 |
| Tshz1    | NM_001081300 | 110796 | 9.15668 | 10.9547 | 0.835868 |
| Zbtb17   | NM_009541    | 22642  | 9.13645 | 9.94496 | 0.918702 |
| Nfxl1    | NM_133921    | 100978 | 9.13178 | 6.92818 | 1.318063 |

|          |              |        |         |         |          |
|----------|--------------|--------|---------|---------|----------|
| Htatsf1  | NM_029371    | 72459  | 9.1248  | 9.40864 | 0.969832 |
| Irf9     | NM_008394    | 16391  | 9.11327 | 8.55096 | 1.06576  |
| Aes      | NM_001276288 | 14797  | 9.1008  | 17.9756 | 0.506286 |
| Pbx1     | NM_183355    | 18514  | 9.05134 | 9.78733 | 0.924802 |
| Preb     | NM_016703    | 50907  | 9.00666 | 8.13031 | 1.107788 |
| Smarcb1  | NM_001161853 | 20587  | 9.0018  | 11.9151 | 0.755495 |
| Hopx     | NM_001159900 |        | 8.96105 | 88.1666 | 0.101638 |
| Zfp637   | NM_177684    |        | 8.89868 | 11.8693 | 0.749722 |
| Zfp384   | NM_001252083 | 269800 | 8.81758 | 7.5784  | 1.163515 |
| Zfp646   | NM_172749    | 233905 | 8.75921 | 8.52911 | 1.026978 |
| Zfp219   | NM_001253695 |        | 8.72498 | 10.4933 | 0.831481 |
| Hdac5    | NM_001077696 | 15184  | 8.69707 | 9.8176  | 0.885865 |
| Hmg20b   | NM_010440    | 15353  | 8.5802  | 15.8325 | 0.541936 |
| Arid1b   | NM_001085355 | 239985 | 8.53089 | 6.84312 | 1.246637 |
| Dcp1a    | NM_133761    | 75901  | 8.51824 | 7.08373 | 1.202508 |
| Ints12   | NM_027927    | 71793  | 8.49311 | 6.45777 | 1.315177 |
| Bcor     | NM_029510    | 71458  | 8.46569 | 9.62187 | 0.879838 |
| Xbp1     | NM_001271730 | 22433  | 8.45557 | 8.23583 | 1.026681 |
| Zbtb21   | NM_001081685 | 114565 | 8.41417 | 5.61359 | 1.498893 |
| Tfeb     | NM_001161722 |        | 8.24893 | 11.6847 | 0.70596  |
| Klf5     | NM_009769    | 12224  | 8.10284 | 19.0365 | 0.425648 |
| Phf8     | NM_001113354 | 320595 | 8.06419 | 6.39795 | 1.260433 |
| Zfp143   | NM_009281    | 20841  | 8.0337  | 9.01223 | 0.891422 |
| Ralgapa1 | NM_001112714 | 56784  | 8.0216  | 10.7329 | 0.747384 |
| Terf1    | NM_009352    | 21749  | 7.98741 | 7.54595 | 1.058503 |
| Smarca4  | NM_011417    | 20586  | 7.84391 | 7.71049 | 1.017304 |
| Zfp623   | NM_030199    | 78834  | 7.84161 | 5.88228 | 1.33309  |
| Meox2    | NM_008584    | 17286  | 7.83565 | 15.7689 | 0.496905 |
| Tada2b   | NM_001170454 | 231151 | 7.81545 | 7.57897 | 1.031202 |
| Zfp516   | NM_001177464 |        | 7.77241 | 7.07636 | 1.098363 |
| Zfp652   | NM_201609    | 268469 | 7.76721 | 6.93048 | 1.120732 |
| Deaf1    | NM_016874    | 54006  | 7.67397 | 6.4729  | 1.185554 |
| Ehmt1    | NM_172545    | 77683  | 7.63732 | 9.82745 | 0.777142 |
| E4f1     | NM_007893    | 13560  | 7.61444 | 7.79942 | 0.976283 |
| Zfp521   | NM_145492    | 225207 | 7.58335 | 8.65908 | 0.875769 |
| Zfp768   | NM_146202    | 233890 | 7.5246  | 11.971  | 0.628569 |
| Nfx1     | NM_023739    | 74164  | 7.47213 | 8.39573 | 0.889992 |
| Map3k7cl | NM_144854    | 224419 | 7.44282 | 5.39621 | 1.379268 |
| Brwd1    | NM_176928    | 93871  | 7.41097 | 11.5043 | 0.644191 |
| Zfp319   | NM_024467    | 79233  | 7.39948 | 7.61035 | 0.972292 |
| Zfp654   | NM_028059    | 72020  | 7.37417 | 6.12045 | 1.204841 |
| Zscan25  | NM_001081431 | 666311 | 7.33515 | 6.6793  | 1.098191 |
| E2f5     | NM_007892    | 13559  | 7.32511 | 5.25403 | 1.394189 |
| Zfp651   | NM_001166644 | 270210 | 7.31428 | 8.53222 | 0.857254 |
| Zbtb44   | NM_001115130 | 235132 | 7.25077 | 5.59422 | 1.296118 |
| Setdb1   | NM_018877    | 84505  | 7.2502  | 6.03233 | 1.20189  |

|         |              |        |         |         |          |
|---------|--------------|--------|---------|---------|----------|
| Creb1   | NM_133828    | 12912  | 7.24804 | 6.99908 | 1.03557  |
| Zfp422  | NM_026057    |        | 7.23727 | 11.3686 | 0.636602 |
| Thap7   | NM_026909    | 69009  | 7.22155 | 7.70898 | 0.936771 |
| Heyl    | NM_013905    | 56198  | 7.15377 | 6.4526  | 1.108665 |
| Irf3    | NM_016849    | 54131  | 7.14183 | 8.1425  | 0.877105 |
| Zscan26 | NM_001013786 | 432731 | 7.12456 | 8.06842 | 0.883018 |
| Zfp532  | NM_207255    | 328977 | 7.05168 | 5.40036 | 1.30578  |
| Gzf1    | NM_028986    | 74533  | 7.02119 | 5.37044 | 1.307377 |
| Capn15  | NM_015830    | 50817  | 7.00957 | 5.00328 | 1.400995 |
| Zfp84   | NM_023750    | 74352  | 6.97956 | 5.33708 | 1.307749 |
| Smarcb1 | NM_011418    | 20587  | 6.95662 | 8.6705  | 0.802332 |
| Nfyb    | NM_010914    | 18045  | 6.93442 | 8.74296 | 0.793143 |
| Ncor2   | NM_011424    | 20602  | 6.88167 | 5.65124 | 1.217727 |
| Smarca4 | NM_001174078 | 20586  | 6.86691 | 8.82309 | 0.778289 |
| Tcf15   | NM_009328    | 21407  | 6.76133 | 16.0188 | 0.422087 |
| Zfp35   | NM_011755    | 22694  | 6.75701 | 7.07779 | 0.954678 |
| Zfp317  | NM_172918    | 244713 | 6.66989 | 5.11559 | 1.303836 |
| Mycn    | NM_008709    | 18109  | 6.6197  | 9.88567 | 0.669626 |
| Esrra   | NM_007953    | 26379  | 6.61662 | 25.3418 | 0.261095 |
| Zfp553  | NM_146201    | 233887 | 6.55772 | 6.97439 | 0.940257 |
| Mef2c   | NM_001170537 | 17260  | 6.54233 | 11.7793 | 0.555409 |
| Zfp236  | NM_177832    | 329002 | 6.52599 | 5.4763  | 1.191679 |
| Rxrb    | NM_011306    | 20182  | 6.52562 | 8.28821 | 0.787338 |
| Zfp276  | NM_020497    | 57247  | 6.50551 | 4.57076 | 1.423288 |
| Nr2c2   | NM_011630    | 22026  | 6.46211 | 7.55244 | 0.855632 |
| Sp2     | NM_001080964 | 78912  | 6.45912 | 7.38849 | 0.874214 |
| Taf5    | NM_177342    | 226182 | 6.45444 | 4.6455  | 1.389396 |
| Orc2    | NM_008765    | 18393  | 6.45353 | 4.8194  | 1.339073 |
| Ncor1   | NM_011308    | 20185  | 6.43393 | 7.01677 | 0.916936 |
| Hif1an  | NM_176958    | 319594 | 6.39001 | 10.1966 | 0.62668  |
| Rarg    | NM_001042727 | 19411  | 6.35188 | 5.03677 | 1.261102 |
| Tulp3   | NM_011657    | 22158  | 6.30202 | 4.65199 | 1.354693 |
| Atoh8   | NM_153778    | 71093  | 6.29319 | 7.69255 | 0.818089 |
| Zfp639  | NM_001161818 |        | 6.26497 | 6.04375 | 1.036603 |
| Stat5b  | NM_001113563 |        | 6.25996 | 11.0094 | 0.568601 |
| Elk1    | NM_007922    | 13712  | 6.23924 | 5.84397 | 1.067637 |
| Rsrc1   | NM_025822    | 66880  | 6.22467 | 5.77266 | 1.078302 |
| Zfp628  | NM_170759    | 232816 | 6.18434 | 6.10454 | 1.013072 |
| Zfp62   | NM_009562    |        | 6.11811 | 7.00486 | 0.873409 |
| Nufip1  | NM_013745    | 27275  | 6.07986 | 4.32651 | 1.405257 |
| Zdhhc1  | NM_175160    | 70796  | 6.05132 | 6.4479  | 0.938495 |
| Zmiz2   | NM_028601    | 52915  | 6.04106 | 8.70894 | 0.693662 |
| Hmga1   | NM_001166537 |        | 6.04054 | 7.32299 | 0.824873 |
| Thap1   | NM_199042    | 73754  | 6.0384  | 5.22616 | 1.155418 |
| Zbtb38  | NM_175537    | 245007 | 5.96303 | 5.53412 | 1.077503 |
| Nrf1    | NM_010938    | 18181  | 5.95358 | 4.8329  | 1.231886 |

|          |              |        |         |         |          |
|----------|--------------|--------|---------|---------|----------|
| Meis1    | NM_001193271 | 17268  | 5.95288 | 6.20279 | 0.95971  |
| Atf7     | NM_146065    | 223922 | 5.94705 | 6.28034 | 0.946931 |
| E2f7     | NM_178609    | 52679  | 5.91818 | 4.94413 | 1.197011 |
| Tcf3     | NM_011548    | 21423  | 5.88832 | 8.67692 | 0.678619 |
| Hnrnpd   | NM_001077265 | 11991  | 5.88243 | 5.76281 | 1.020757 |
| Nfat5    | NM_133957    | 54446  | 5.87625 | 5.13091 | 1.145265 |
| Zfp408   | NM_001033451 | 381410 | 5.86865 | 4.15054 | 1.413949 |
| Rcor3    | NM_144814    | 214742 | 5.86645 | 7.22376 | 0.812105 |
| Zfp821   | NM_001167946 | 75871  | 5.80154 | 7.0353  | 0.824633 |
| Camta2   | NM_001190378 |        | 5.76058 | 7.12627 | 0.808358 |
| Tsc22d3  | NM_001077364 | 14605  | 5.7453  | 16.9678 | 0.3386   |
| Zbtb39   | NM_198035    | 320080 | 5.74136 | 5.11634 | 1.122162 |
| Zfp746   | NM_001163475 | 69228  | 5.65797 | 6.67207 | 0.848008 |
| Tead1    | NM_009346    | 21676  | 5.61421 | 6.57615 | 0.853723 |
| Zfp597   | NM_001033159 | 71063  | 5.60886 | 4.80288 | 1.167812 |
| Jdp2     | NM_001205052 |        | 5.57828 | 6.98907 | 0.798143 |
| Zkscan3  | NM_001145778 |        | 5.53947 | 6.68818 | 0.828248 |
| Zfp513   | NM_001177901 | 101023 | 5.53415 | 3.86247 | 1.432801 |
| Zbtb48   | NM_133879    | 100090 | 5.51561 | 4.14695 | 1.33004  |
| Fam132a  | NM_026125    | 67389  | 5.51107 | 4.96064 | 1.110959 |
| Nfatc2ip | NM_010900    | 18020  | 5.49362 | 5.29771 | 1.03698  |
| Zfp69    | NM_001005788 | 381549 | 5.48263 | 5.68589 | 0.964252 |
| Hmga1    | NM_001166541 |        | 5.46482 | 7.0954  | 0.770192 |
| Mtf1     | NM_008636    | 17764  | 5.45269 | 4.57005 | 1.193136 |
| Zbtb33   | NM_020256    | 56805  | 5.43407 | 5.95615 | 0.912346 |
| Zfp64    | NM_009564    | 22722  | 5.41771 | 5.23653 | 1.034599 |
| Hes6     | NM_019479    | 55927  | 5.38831 | 13.3097 | 0.404841 |
| Zfp653   | NM_177318    | 319601 | 5.35708 | 4.31493 | 1.241522 |
| Tshz3    | NM_172298    | 243931 | 5.33346 | 3.96908 | 1.343752 |
| Zfp68    | NM_001044747 | 24135  | 5.31938 | 4.51982 | 1.176901 |
| Prdm2    | NM_001256380 | 110593 | 5.28796 | 5.03032 | 1.051217 |
| Bbx      | NM_027444    | 70508  | 5.28566 | 4.6115  | 1.146191 |
| Nr2f2    | NM_009697    | 11819  | 5.25063 | 5.02079 | 1.045778 |
| Sox17    | NM_011441    | 20671  | 5.21002 | 20.5079 | 0.254049 |
| Tbx20    | NM_001205085 | 57246  | 5.19168 | 4.73428 | 1.096614 |
| Hopx     | NM_175606    |        | 5.18541 | 59.2087 | 0.087579 |
| Gmeb1    | NM_020273    |        | 5.18346 | 4.26534 | 1.215251 |
| Znf512b  | NM_001164597 | 269401 | 5.16307 | 6.71844 | 0.768492 |
| Fmnl2    | NM_172409    | 71409  | 5.14517 | 3.967   | 1.296993 |
| E2f8     | NM_001013368 |        | 5.1316  | 5.38172 | 0.953524 |
| Zfp687   | NM_030074    | 78266  | 5.11885 | 6.11758 | 0.836744 |
| Sp4      | NM_009239    | 20688  | 5.1176  | 3.87618 | 1.320269 |
| Rxrb     | NM_001205216 | 20182  | 5.11474 | 5.79055 | 0.883291 |
| Zfp52    | NM_144515    | 22710  | 5.05614 | 7.94809 | 0.636145 |
| Mybl2    | NM_008652    | 17865  | 5.05391 | 4.3346  | 1.165946 |
| Zkscan3  | NM_023685    |        | 5.03507 | 6.1621  | 0.817103 |

|         |              |        |         |         |          |
|---------|--------------|--------|---------|---------|----------|
| Polr3f  | NM_029763    | 70408  | 4.98446 | 5.80126 | 0.859203 |
| Tcf7l1  | NM_001079822 | 21415  | 4.96602 | 3.9729  | 1.249974 |
| Sra1    | NM_146085    | 24068  | 4.94965 | 4.02181 | 1.230702 |
| Zfp523  | NM_172617    |        | 4.94788 | 8.63292 | 0.573141 |
| Zfp629  | NM_177226    |        | 4.93154 | 4.50437 | 1.094835 |
| Gm608   | NM_001029889 |        | 4.85209 | 4.60555 | 1.053531 |
| Smarca4 | NM_001174079 | 20586  | 4.84291 | 6.19983 | 0.781136 |
| Zhx2    | NM_199449    | 387609 | 4.82715 | 5.02828 | 0.96     |
| Med16   | NM_198107    | 216154 | 4.82529 | 9.25119 | 0.521586 |
| Ldb2    | NM_010698    | 16826  | 4.79454 | 10.4027 | 0.460894 |
| Zfp189  | NM_145547    |        | 4.77105 | 4.35339 | 1.095939 |
| Pard3b  | NM_001081050 | 72823  | 4.75178 | 3.40751 | 1.394502 |
| Ankle2  | NM_001253814 | 71782  | 4.74894 | 5.5292  | 0.858884 |
| Zbtb4   | NM_029348    | 75580  | 4.69695 | 5.6287  | 0.834464 |
| Nkrf    | NM_029891    | 77286  | 4.69692 | 3.26465 | 1.438721 |
| Tead1   | NM_001166584 | 21676  | 4.69271 | 3.36383 | 1.39505  |
| Gtf3a   | NM_025652    | 66596  | 4.68768 | 8.43653 | 0.555641 |
| Tbx2    | NM_009324    | 21385  | 4.64831 | 5.96498 | 0.779267 |
| Zbtb41  | NM_172643    | 226470 | 4.61507 | 4.8549  | 0.9506   |
| Zbtb6   | NM_146253    | 241322 | 4.59901 | 3.42974 | 1.340921 |
| Zfp516  | NM_183033    |        | 4.59611 | 4.55614 | 1.008773 |
| Zbtb46  | NM_028125    | 72147  | 4.55138 | 5.12054 | 0.888848 |
| Kat7    | NM_001195004 | 217127 | 4.55119 | 4.47936 | 1.016036 |
| Cbx4    | NM_007625    | 12418  | 4.54875 | 4.52933 | 1.004288 |
| Crem    | NM_001110854 | 12916  | 4.53932 | 7.93717 | 0.571907 |
| Mta3    | NM_001171054 | 116871 | 4.53655 | 6.80698 | 0.666456 |
| Gmcl1   | NM_011818    | 23885  | 4.52287 | 3.75168 | 1.205559 |
| Zfp574  | NM_001168506 |        | 4.48256 | 3.93243 | 1.139896 |
| Prdm15  | NM_144789    |        | 4.48215 | 3.2036  | 1.399098 |
| Zfp959  | NM_145490    | 224893 | 4.48116 | 4.54421 | 0.986125 |
| Zfp282  | NM_146175    | 101095 | 4.40208 | 4.70844 | 0.934934 |
| Zbtb21  | NM_001081684 | 114565 | 4.37979 | 2.99972 | 1.460066 |
| Zfp1    | NM_001037665 | 22640  | 4.33166 | 4.19514 | 1.032542 |
| Zfp397  | NM_027007    | 69256  | 4.29441 | 4.37381 | 0.981846 |
| Gtf2e1  | NM_028812    | 74197  | 4.29122 | 4.71666 | 0.909801 |
| Tceal1  | NM_146236    | 237052 | 4.28209 | 5.99608 | 0.714148 |
| Rnf138  | NM_019706    | 56515  | 4.27811 | 3.09088 | 1.384107 |
| Zfp580  | NM_026900    | 68992  | 4.27069 | 3.7743  | 1.131518 |
| Zbtb18  | NM_001012330 | 30928  | 4.26022 | 8.22859 | 0.517734 |
| Mxd3    | NM_016662    | 17121  | 4.23838 | 5.16012 | 0.821372 |
| Zfp12   | NM_177681    | 231866 | 4.20139 | 4.6368  | 0.906097 |
| Crebzf  | NM_145151    | 233490 | 4.19355 | 4.25549 | 0.985445 |
| Ring1   | NM_009066    | 19763  | 4.15432 | 5.23236 | 0.793967 |
| Npas2   | NM_008719    | 18143  | 4.14474 | 3.09799 | 1.33788  |
| Zfp711  | NM_177747    | 245595 | 4.08937 | 4.65687 | 0.878137 |
| Tcf3    | NM_001164149 | 21423  | 4.0488  | 6.78236 | 0.59696  |

|         |              |        |         |         |          |
|---------|--------------|--------|---------|---------|----------|
| Zfp280b | NM_177475    | 64453  | 4.04655 | 3.38973 | 1.193768 |
| Mxi1    | NM_010847    | 17859  | 4.02198 | 4.61074 | 0.872307 |
| Snapc4  | NM_172339    |        | 4.02026 | 3.20357 | 1.254931 |
| Tal1    | NM_011527    |        | 3.99166 | 4.98958 | 0.799999 |
| Zmiz2   | NM_001005867 | 52915  | 3.98754 | 8.0681  | 0.494235 |
| Zfp512  | NM_172993    | 269639 | 3.96273 | 5.1741  | 0.765878 |
| Stat2   | NM_019963    | 20847  | 3.93796 | 3.87104 | 1.017287 |
| Tada2a  | NM_172562    | 217031 | 3.91301 | 3.35912 | 1.164891 |
| Zfp869  | NM_001039965 | 66869  | 3.90334 | 4.66938 | 0.835944 |
| Pparg   | NM_001127330 | 19016  | 3.90165 | 16.6298 | 0.234618 |
| Tshz2   | NM_080455    |        | 3.90063 | 3.99514 | 0.976344 |
| Zfp865  | NM_001033383 | 319748 | 3.88571 | 4.35244 | 0.892766 |
| Zkscan6 | NM_026107    |        | 3.86276 | 3.26534 | 1.182958 |
| Hnrnpd  | NM_007516    | 11991  | 3.8498  | 3.41264 | 1.1281   |
| Polrmt  | NM_172551    | 216151 | 3.84733 | 6.77216 | 0.56811  |
| Trim24  | NM_145076    | 21848  | 3.84189 | 6.12165 | 0.627591 |
| Bach2   | NM_001109661 | 12014  | 3.8292  | 4.2961  | 0.89132  |
| Zfp266  | NM_001082485 | 77519  | 3.82479 | 2.8457  | 1.344059 |
| Clpb    | NM_009191    | 20480  | 3.79649 | 7.54637 | 0.503088 |
| Zfp275  | NM_031494    | 27081  | 3.76813 | 2.55696 | 1.473676 |
| Trim24  | NM_001272076 | 21848  | 3.76688 | 3.84203 | 0.98044  |
| Cux1    | NM_009986    | 13047  | 3.7627  | 4.24717 | 0.885931 |
| Zfp68   | NM_013844    | 24135  | 3.7049  | 3.76875 | 0.983058 |
| Hnrnpd  | NM_001077266 | 11991  | 3.69195 | 3.16307 | 1.167205 |
| Zfp869  | NM_181274    | 66869  | 3.67567 | 2.55567 | 1.438241 |
| Patz1   | NM_019574    | 56218  | 3.6707  | 3.85811 | 0.951424 |
| Rreb1   | NM_001177869 |        | 3.6698  | 5.40415 | 0.679071 |
| Zfp579  | NM_026741    |        | 3.66965 | 4.92271 | 0.745453 |
| Mta3    | NM_001171053 | 116871 | 3.66655 | 3.59525 | 1.019832 |
| Zbtb14  | NM_009547    |        | 3.6345  | 4.55508 | 0.7979   |
| Tmpo    | NM_001080130 | 21917  | 3.6221  | 3.13497 | 1.155386 |
| Tbx3    | NM_198052    | 21386  | 3.61646 | 11.5421 | 0.313328 |
| Tulp4   | NM_001103181 | 68842  | 3.60399 | 2.5759  | 1.399119 |
| Tcf3    | NM_001164150 | 21423  | 3.60036 | 4.60871 | 0.781208 |
| Mlx     | NM_001159385 | 21428  | 3.58544 | 4.28595 | 0.836557 |
| Rxrb    | NM_001205214 | 20182  | 3.5809  | 4.85931 | 0.736915 |
| Hmg20b  | NM_001163165 | 15353  | 3.5728  | 7.2958  | 0.489706 |
| Tead4   | NM_011567    | 21679  | 3.56686 | 3.81173 | 0.935759 |
| Tead4   | NM_001080979 | 21679  | 3.56604 | 4.60145 | 0.774982 |
| Smarca1 | NM_053123    | 93761  | 3.56429 | 2.95918 | 1.204486 |
| Six5    | NM_011383    | 20475  | 3.53111 | 4.0949  | 0.862319 |
| Trim24  | NM_001272064 | 21848  | 3.52208 | 7.37109 | 0.477823 |
| Zfp790  | NM_146185    |        | 3.51823 | 3.50936 | 1.002528 |
| Zfp668  | NM_146259    |        | 3.44441 | 3.14816 | 1.094103 |
| Rnf138  | NM_207623    | 56515  | 3.43997 | 2.33563 | 1.472823 |
| Zfp407  | NM_001033341 | 240476 | 3.4399  | 4.21311 | 0.816475 |

|          |              |           |         |         |          |
|----------|--------------|-----------|---------|---------|----------|
| Foxp1    | NM_053202    | 108655    | 3.43379 | 3.0633  | 1.120945 |
| Polr3b   | NM_027423    | 70428     | 3.42892 | 4.75772 | 0.720707 |
| Whsc1    | NM_175231    | 107823    | 3.40675 | 2.64637 | 1.287329 |
| Hmgxb3   | NM_134134    | 106894    | 3.38718 | 3.41777 | 0.99105  |
| Nfib     | NM_001113209 | 18028     | 3.38627 | 2.75347 | 1.229819 |
| Camta1   | NM_001195565 | 100072    | 3.3847  | 4.58023 | 0.73898  |
| Zkscan5  | NM_016683    | 22757     | 3.32383 | 4.11056 | 0.808608 |
| Gtf2ird1 | NM_001081463 | 57080     | 3.27336 | 2.40336 | 1.361993 |
| Arid3a   | NM_007880    | 13496     | 3.25644 | 3.20855 | 1.014926 |
| Rarb     | NM_011243    | 218772    | 3.2478  | 4.42682 | 0.733664 |
| Prox1    | NM_008937    | 19130     | 3.23773 | 11.1547 | 0.290257 |
| Prdm10   | NM_001080817 | 382066    | 3.21881 | 2.5669  | 1.253968 |
| Hmga1    | NM_001166543 |           | 3.19863 | 4.62982 | 0.690876 |
| Cdk2     | NM_183417    | 12566     | 3.19453 | 5.981   | 0.534113 |
| Brca1    | NM_009764    | 12189     | 3.18182 | 2.60875 | 1.219672 |
| Gtf2h2   | NM_022011    | 23894     | 3.17129 | 5.41658 | 0.585478 |
| Mier1    | NM_027696    |           | 3.14541 | 3.44485 | 0.913076 |
| Hlf      | NM_172563    | 217082    | 3.14123 | 3.34604 | 0.93879  |
| Hmgxb4   | NM_178017    |           | 3.12886 | 4.07504 | 0.767811 |
| Zscan29  | NM_178889    | 99334     | 3.12543 | 2.68584 | 1.163669 |
| Ncor1    | NM_177229    | 20185     | 3.11068 | 3.41646 | 0.910498 |
| Zfp251   | NM_001007568 | 71591     | 3.10919 | 3.0748  | 1.011184 |
| Gm14295  | NM_001205057 | 100039123 | 3.10851 | 3.83569 | 0.810417 |
| Dnajc1   | NM_001190817 |           | 3.10647 | 2.19071 | 1.41802  |
| Rcor2    | NM_054048    | 104383    | 3.07175 | 8.32125 | 0.369145 |
| Hltf     | NM_009210    | 20585     | 3.06389 | 3.46403 | 0.884487 |
| Mxi1     | NM_001008542 | 17859     | 3.04822 | 3.77219 | 0.808077 |
| Hmga1    | NM_001166546 |           | 3.04157 | 2.07876 | 1.463166 |
| Cers4    | NM_026058    |           | 3.02698 | 7.8511  | 0.385549 |
| Tox2     | NM_001098799 | 269389    | 3.01657 | 4.3703  | 0.690243 |
| Zfp568   | NM_001167873 | 243905    | 3.00494 | 4.11909 | 0.729515 |
| Zkscan1  | NM_133906    | 74570     | 3.00385 | 3.87774 | 0.774639 |
| Zfp292   | NM_013889    | 30046     | 2.98313 | 5.00195 | 0.596393 |
| Jarid2   | NM_001205044 |           | 2.96402 | 2.84893 | 1.040398 |
| Ebf3     | NM_001113414 | 13593     | 2.94245 | 2.59187 | 1.135261 |
| Gtf2ird2 | NM_053266    | 114674    | 2.94215 | 3.03241 | 0.970235 |
| Nkx2-5   | NM_008700    | 18091     | 2.94028 | 38.5231 | 0.076325 |
| Hey2     | NM_013904    | 15214     | 2.93821 | 9.18083 | 0.320038 |
| Zfp617   | NM_133358    | 170938    | 2.89496 | 7.73929 | 0.37406  |
| Zfp827   | NM_178267    | 622675    | 2.87195 | 3.94143 | 0.728657 |
| Mecp2    | NM_010788    | 17257     | 2.84775 | 3.64602 | 0.781057 |
| Rbfox2   | NM_053104    | 93686     | 2.83904 | 3.92146 | 0.723975 |
| Thap3    | NM_175152    | 69876     | 2.83491 | 3.27331 | 0.866068 |
| Tfdp2    | NM_001184706 | 211586    | 2.8283  | 3.25746 | 0.868253 |
| Zbtb25   | NM_028356    | 109929    | 2.81431 | 3.07391 | 0.915547 |
| Zfp574   | NM_175477    |           | 2.80906 | 2.60116 | 1.079926 |



|          |              |        |         |         |          |
|----------|--------------|--------|---------|---------|----------|
| Zfp655   | NM_001083958 | 72611  | 2.80442 | 5.04895 | 0.555446 |
| Prdm5    | NM_027547    | 70779  | 2.80019 | 2.65396 | 1.055099 |
| Setdb2   | NM_001081024 | 239122 | 2.78759 | 2.24496 | 1.24171  |
| Ankrd49  | NM_019683    | 56503  | 2.77461 | 3.87766 | 0.715537 |
| Zfp90    | NM_011764    | 22751  | 2.77141 | 2.9529  | 0.938538 |
| Pcgf6    | NM_027654    | 71041  | 2.76789 | 2.83479 | 0.9764   |
| Zbtb24   | NM_153398    | 268294 | 2.75491 | 3.16732 | 0.869792 |
| Irx3     | NM_008393    | 16373  | 2.74418 | 4.85356 | 0.565395 |
| Msx1     | NM_010835    | 17701  | 2.72138 | 4.49123 | 0.605932 |
| Zfp524   | NM_025324    | 66056  | 2.72099 | 4.94044 | 0.550759 |
| Nfib     | NM_001113210 | 18028  | 2.70686 | 2.18521 | 1.238718 |
| Lmo2     | NM_001142336 | 16909  | 2.70613 | 3.42014 | 0.791234 |
| Zbtb12   | NM_198886    | 193736 | 2.704   | 4.29799 | 0.629131 |
| Zbtb49   | NM_029162    | 75079  | 2.69426 | 1.89309 | 1.423208 |
| Sox12    | NM_011438    | 20667  | 2.67948 | 7.15615 | 0.37443  |
| Zfp758   | NM_145484    | 224598 | 2.67894 | 2.38942 | 1.121167 |
| Mbtps2   | NM_172307    | 270669 | 2.67558 | 2.9776  | 0.898569 |
| Kat5     | NM_001199248 | 81601  | 2.64745 | 2.43451 | 1.087467 |
| Smyd1    | NM_009762    | 12180  | 2.64494 | 32.3459 | 0.08177  |
| Wdhd1    | NM_172598    | 218973 | 2.6041  | 2.37459 | 1.096652 |
| Tef      | NM_153484    | 21685  | 2.59797 | 1.90106 | 1.36659  |
| Zkscan14 | NM_023322    | 67235  | 2.58983 | 4.24983 | 0.609396 |
| Prdm1    | NM_007548    | 12142  | 2.58813 | 9.30455 | 0.278157 |
| Nfkb2    | NM_001177370 |        | 2.58455 | 2.30667 | 1.120468 |
| Cbx2     | NM_007623    | 12416  | 2.58139 | 3.13386 | 0.823709 |
| Rxrb     | NM_001205215 | 20182  | 2.57784 | 3.13382 | 0.822587 |
| Sirt6    | NM_181586    | 50721  | 2.56894 | 3.59658 | 0.714273 |
| Zfp160   | NM_145483    | 224585 | 2.53817 | 2.66822 | 0.95126  |
| Fiz1     | NM_001110328 |        | 2.53643 | 1.93031 | 1.314001 |
| Zfp507   | NM_177739    | 668501 | 2.53505 | 3.1786  | 0.797537 |
| Zfp710   | NM_001145999 | 209225 | 2.52564 | 1.72306 | 1.465788 |
| Ncor2    | NM_001253905 | 20602  | 2.51855 | 1.86048 | 1.35371  |
| Smyd1    | NM_001160127 | 12180  | 2.51107 | 44.4336 | 0.056513 |
| Pias3    | NM_146135    | 229615 | 2.50799 | 3.07338 | 0.816036 |
| Cdkn2d   | NM_009878    | 12581  | 2.49647 | 3.17077 | 0.787339 |
| Pbx1     | NM_008783    | 18514  | 2.48446 | 1.96462 | 1.264601 |
| Hic2     | NM_178922    | 58180  | 2.46598 | 2.60334 | 0.947237 |
| Ttf1     | NM_009442    | 22130  | 2.45742 | 2.63915 | 0.931141 |
| Mysm1    | NM_177239    | 320713 | 2.43272 | 2.35653 | 1.032331 |
| Nrf1     | NM_001164227 | 18181  | 2.42892 | 2.59983 | 0.934261 |
| Zfp423   | NM_033327    |        | 2.42755 | 1.65045 | 1.470841 |
| Mlx      | NM_011550    | 21428  | 2.422   | 2.19553 | 1.10315  |
| Ehmt1    | NM_001109687 | 77683  | 2.42058 | 2.43198 | 0.995312 |
| Tfe3     | NM_001271489 | 209446 | 2.41417 | 2.30701 | 1.04645  |
| Whsc1    | NM_001177884 | 107823 | 2.41305 | 2.93773 | 0.8214   |
| Tmpo     | NM_001080131 | 21917  | 2.41111 | 2.0038  | 1.203269 |

|               |              |           |         |         |          |
|---------------|--------------|-----------|---------|---------|----------|
| Rfx5          | NM_017395    |           | 2.41009 | 2.36572 | 1.018755 |
| Osr1          | NM_011859    | 23967     | 2.40533 | 1.60507 | 1.498583 |
| Foxj1         | NM_008240    | 15223     | 2.40517 | 1.84036 | 1.306902 |
| Zscan2        | NM_009553    | 22691     | 2.38744 | 4.53579 | 0.526356 |
| Hoxa5         | NM_010453    | 15402     | 2.36887 | 4.28833 | 0.552399 |
| Zfp526        | NM_175436    | 210172    | 2.3625  | 2.24197 | 1.053761 |
| Zfp764        | NM_146203    | 233893    | 2.35375 | 2.17211 | 1.083624 |
| Terf2         | NM_001083118 | 21750     | 2.35196 | 2.43253 | 0.966878 |
| Nr2c1         | NM_011629    | 22025     | 2.34515 | 2.9273  | 0.801131 |
| Hnrnpd        | NM_001077267 | 11991     | 2.3367  | 1.78583 | 1.308467 |
| Zfp639        | NM_144519    |           | 2.32707 | 2.55517 | 0.91073  |
| Lcorl         | NM_178142    | 209707    | 2.31223 | 2.9349  | 0.787839 |
| Zfp566        | NM_152814    | 72556     | 2.30399 | 1.98621 | 1.159993 |
| Gm13139       | NM_001083918 | 666532    | 2.2922  | 2.67282 | 0.857596 |
| Zfp697        | NM_172863    | 242109    | 2.28797 | 1.88053 | 1.216662 |
| Zfp942        | NM_001199048 | 73233     | 2.28784 | 2.61161 | 0.876027 |
| Zbtb20        | NM_181058    |           | 2.28768 | 2.08705 | 1.096131 |
| Zfp58         | NM_001007575 | 238693    | 2.26448 | 1.76436 | 1.283457 |
| 2610008E11Rik | NM_001004362 | 72128     | 2.25572 | 4.73711 | 0.476181 |
| Wwtr1         | NM_001168281 | 97064     | 2.25507 | 2.04631 | 1.102018 |
| Zdhhc21       | NM_026647    | 68268     | 2.25022 | 2.3157  | 0.971723 |
| Hoxb2         | NM_134032    | 103889    | 2.24921 | 1.76754 | 1.272509 |
| Zfp81         | NM_207541    | 224694    | 2.18805 | 2.45219 | 0.892284 |
| E2f2          | NM_177733    | 242705    | 2.17734 | 2.16583 | 1.005314 |
| Zfp943        | NM_001025373 | 74670     | 2.17071 | 2.89561 | 0.749656 |
| Ahr           | NM_013464    | 11622     | 2.14875 | 3.55869 | 0.603804 |
| Zfp874b       | NM_001076791 | 408067    | 2.13303 | 2.84606 | 0.749468 |
| Mecp2         | NM_001081979 | 17257     | 2.13134 | 2.52026 | 0.845683 |
| Zfp809        | NM_001164624 | 235047    | 2.12929 | 1.964   | 1.08416  |
| Tcf3          | NM_001164152 | 21423     | 2.12908 | 2.72586 | 0.781067 |
| Xrcc3         | NM_028875    | 74335     | 2.12354 | 1.6378  | 1.296581 |
| Arhgap17      | NM_001122641 | 70497     | 2.10493 | 1.46056 | 1.44118  |
| Mafa          | NM_194350    | 378435    | 2.09911 | 1.46556 | 1.432292 |
| Hopx          | NM_001159901 |           | 2.09132 | 4.00192 | 0.522579 |
| Csdc2         | NM_145473    | 105859    | 2.07683 | 2.10997 | 0.984294 |
| Lcor          | NM_172154    |           | 2.07153 | 2.31371 | 0.895328 |
| Zscan21       | NM_001044703 |           | 2.05033 | 3.05747 | 0.670597 |
| Mef2c         | NM_025282    | 17260     | 2.03041 | 3.93032 | 0.516602 |
| Ets1          | NM_001038642 | 23871     | 2.01587 | 3.78284 | 0.532899 |
| Zfp74         | NM_178384    | 72723     | 1.9955  | 1.97096 | 1.012451 |
| AA987161      | NM_001163246 | 100416706 | 1.98107 | 2.06906 | 0.957473 |
| Zfp932        | NM_145563    | 69504     | 1.97319 | 2.34693 | 0.840754 |
| Zfp386        | NM_019565    | 56220     | 1.96858 | 3.46214 | 0.568602 |
| Zbtb45        | NM_001024699 |           | 1.96328 | 2.54393 | 0.771751 |
| Stat1         | NM_009283    | 20846     | 1.95471 | 3.25055 | 0.601347 |
| Satb1         | NM_001163630 | 20230     | 1.95249 | 2.94903 | 0.662079 |

|         |              |        |         |         |          |
|---------|--------------|--------|---------|---------|----------|
| Mta3    | NM_054082    | 116871 | 1.95182 | 2.08677 | 0.935331 |
| Zfp37   | NM_009554    | 22696  | 1.94932 | 1.81794 | 1.072269 |
| Zbtb33  | NM_001079513 | 56805  | 1.94346 | 1.38613 | 1.402076 |
| Dido1   | NM_011805    | 23856  | 1.93526 | 2.4365  | 0.794279 |
| Zfp825  | NM_146231    | 235956 | 1.93284 | 2.07864 | 0.929858 |
| Zfp101  | NM_009542    | 22643  | 1.9094  | 1.44385 | 1.322437 |
| Zfp26   | NM_011753    | 22688  | 1.90795 | 1.50721 | 1.265882 |
| Irf9    | NM_001159417 | 16391  | 1.90767 | 1.85294 | 1.029537 |
| Zim1    | NM_011769    | 22776  | 1.90345 | 2.13584 | 0.891195 |
| Zfp61   | NM_009561    | 22719  | 1.89972 | 1.41927 | 1.338519 |
| Zfp944  | NM_176962    | 319615 | 1.89563 | 1.58814 | 1.193616 |
| Zfp202  | NM_030713    |        | 1.85314 | 1.40614 | 1.317892 |
| Zfp606  | NM_026112    | 67370  | 1.84944 | 2.16873 | 0.852776 |
| Sp2     | NM_030220    | 78912  | 1.83144 | 1.47801 | 1.239126 |
| Zfp866  | NM_177899    | 330788 | 1.82436 | 1.68568 | 1.082269 |
| Zfp7    | NM_145916    | 223669 | 1.81083 | 1.80462 | 1.003441 |
| Irx5    | NM_018826    | 54352  | 1.80966 | 2.05387 | 0.881098 |
| Rfx3    | NM_011265    | 19726  | 1.80601 | 1.36569 | 1.322416 |
| Zfp619  | NM_001004139 | 70227  | 1.80142 | 1.39093 | 1.295119 |
| Zbtb42  | NM_001100460 | 382639 | 1.79376 | 2.07775 | 0.863318 |
| Zfat    | NM_198644    | 380993 | 1.78066 | 1.63404 | 1.089729 |
| Zfp105  | NM_009544    | 22646  | 1.77224 | 2.80644 | 0.63149  |
| Gm14420 | NM_001177568 | 628308 | 1.76251 | 2.01035 | 0.876718 |
| Zfp770  | NM_175466    | 228491 | 1.75445 | 2.32765 | 0.753743 |
| Foxo6   | NM_194060    | 329934 | 1.74743 | 2.30934 | 0.756679 |
| Zfat    | NM_001145888 | 380993 | 1.74525 | 1.57102 | 1.110902 |
| Cbx8    | NM_013926    | 30951  | 1.74432 | 2.2038  | 0.791506 |
| Tfcp2   | NM_033476    | 21422  | 1.73304 | 2.8367  | 0.610935 |
| Smad5   | NM_001164042 |        | 1.7244  | 2.05182 | 0.840425 |
| Mitf    | NM_001113198 | 17342  | 1.72354 | 1.8935  | 0.91024  |
| Zfp429  | NM_001080941 | 72807  | 1.72302 | 3.10816 | 0.554354 |
| Hmga1   | NM_001166536 |        | 1.72144 | 1.68133 | 1.023856 |
| Zfp217  | NM_001159683 |        | 1.71434 | 2.68916 | 0.6375   |
| Zfp248  | NM_028335    | 72720  | 1.70376 | 1.29685 | 1.313768 |
| Mybl1   | NM_008651    | 17864  | 1.69889 | 1.27286 | 1.334703 |
| Zfp119a | NM_144546    | 104349 | 1.69657 | 1.77902 | 0.953654 |
| Zfp958  | NM_145591    | 233987 | 1.67193 | 2.47666 | 0.675074 |
| Per3    | NM_011067    | 18628  | 1.6555  | 2.4517  | 0.675246 |
| Zfp710  | NM_175433    | 209225 | 1.6519  | 3.99367 | 0.41363  |
| Zbtb40  | NM_198248    | 230848 | 1.6474  | 1.95992 | 0.840545 |
| Tfe3    | NM_172472    | 209446 | 1.64645 | 3.10152 | 0.530853 |
| Tfdp2   | NM_001184711 | 211586 | 1.63696 | 1.6729  | 0.978516 |
| Tcf3    | NM_001164147 | 21423  | 1.62951 | 3.56223 | 0.457441 |
| Hspb9   | NM_029307    | 75482  | 1.61837 | 1.40931 | 1.148342 |
| Zfp51   | NM_009558    | 22709  | 1.60418 | 2.40973 | 0.665709 |
| Stat5a  | NM_011488    | 20850  | 1.59416 | 2.35812 | 0.67603  |

|               |              |           |         |          |          |
|---------------|--------------|-----------|---------|----------|----------|
| Lyl1          | NM_008535    | 17095     | 1.58318 | 2.46917  | 0.641179 |
| Creb1         | NM_001037726 | 12912     | 1.56905 | 1.16332  | 1.348769 |
| Zfp266        | NM_001135019 | 77519     | 1.56157 | 1.89029  | 0.826101 |
| Zbtb7c        | NM_145356    | 207259    | 1.55529 | 1.03935  | 1.496406 |
| Gm13251       | NM_001085522 | 433791    | 1.55516 | 1.72445  | 0.90183  |
| Creb1         | NM_009952    | 12912     | 1.54436 | 1.66888  | 0.925387 |
| Zhx1          | NM_001042438 |           | 1.54329 | 1.67537  | 0.921164 |
| Zfp952        | NM_001045559 | 240067    | 1.52562 | 1.77229  | 0.860818 |
| Scx           | NM_198885    | 20289     | 1.52411 | 4.04141  | 0.377123 |
| Thap3         | NM_001145929 | 69876     | 1.52351 | 2.67746  | 0.569013 |
| E430018J23Rik | NM_198011    |           | 1.51743 | 1.82172  | 0.832966 |
| Repin1        | NM_001079903 |           | 1.51626 | 1.07746  | 1.407254 |
| Mbd4          | NM_010774    | 17193     | 1.51249 | 2.27334  | 0.665316 |
| Zfp672        | NM_001256516 |           | 1.50716 | 1.72004  | 0.876235 |
| Ankrd42       | NM_028665    | 73845     | 1.50487 | 1.23083  | 1.222647 |
| Zfp369        | NM_178364    | 170936    | 1.50204 | 2.07107  | 0.725248 |
| Zfp213        | NM_001033496 | 449521    | 1.50026 | 2.59103  | 0.579021 |
| Sall2         | NM_001244916 | 50524     | 1.49524 | 1.18186  | 1.265158 |
| Zfp472        | NM_153063    | 224691    | 1.49259 | 1.33671  | 1.116615 |
| Gm13157       | NM_001127189 | 100041677 | 1.48783 | 3.05973  | 0.486262 |
| Rnf14         | NM_001164621 | 56736     | 1.48773 | 2.34988  | 0.633109 |
| Stat5a        | NM_001164062 | 20850     | 1.48543 | 1.36742  | 1.086301 |
| Zfp689        | NM_175163    | 71131     | 1.48152 | 1.4014   | 1.057171 |
| Tcf3          | NM_001164153 | 21423     | 1.481   | 1.60548  | 0.922466 |
| Hmga1         | NM_001039356 |           | 1.47074 | 4.25752  | 0.345445 |
| Rfxank        | NM_001025589 | 19727     | 1.47037 | 4.20776  | 0.349442 |
| Arhgap17      | NM_001122640 | 70497     | 1.46692 | 1.38014  | 1.062878 |
| Ankra2        | NM_023472    | 68558     | 1.45333 | 3.64072  | 0.399188 |
| Nr2f1         | NM_010151    | 13865     | 1.44069 | 2.58471  | 0.557389 |
| Tcf3          | NM_001164148 | 21423     | 1.43687 | 2.10339  | 0.683121 |
| Zfp366        | NM_001004149 | 238803    | 1.43182 | 5.79344  | 0.247145 |
| Zkscan17      | NM_001130529 | 268417    | 1.42603 | 1.63333  | 0.873081 |
| Zfp667        | NM_001024928 |           | 1.42507 | 1.42825  | 0.997773 |
| B930041F14Rik | NM_178699    | 230991    | 1.40092 | 0.954842 | 1.467175 |
| Zfp65         | NM_145622    | 235907    | 1.38141 | 1.7803   | 0.775942 |
| Zfp119b       | NM_146249    | 240120    | 1.37019 | 1.72989  | 0.792068 |
| Etohi1        | NM_001177400 | 626848    | 1.36763 | 2.94819  | 0.463888 |
| Tcf7l2        | NM_001142922 | 21416     | 1.34636 | 1.72054  | 0.782522 |
| Ebf2          | NM_010095    | 13592     | 1.34198 | 1.07003  | 1.254152 |
| Zfp426        | NM_001110309 |           | 1.32943 | 1.26747  | 1.048885 |
| Phtf1         | NM_013629    | 18685     | 1.32375 | 1.45018  | 0.912818 |
| Zfp28         | NM_175247    | 22690     | 1.31853 | 1.59745  | 0.825397 |
| Zfp426        | NM_146221    |           | 1.30435 | 1.50888  | 0.864449 |
| A530054K11Rik | NM_183146    | 212281    | 1.27678 | 1.63788  | 0.779532 |
| Zfp809        | NM_172763    | 235047    | 1.27205 | 1.44531  | 0.880123 |
| Zfp946        | NM_198003    |           | 1.26946 | 1.61665  | 0.785241 |

|         |               |        |         |          |          |
|---------|---------------|--------|---------|----------|----------|
| Setdb1  | NM_001163642  | 84505  | 1.26731 | 0.923958 | 1.37161  |
| Camta2  | NM_001190379  |        | 1.26686 | 1.12782  | 1.123282 |
| Ank1    | NM_0011110783 | 11733  | 1.25956 | 6.94421  | 0.181383 |
| Atm     | NM_007499     | 11920  | 1.25678 | 1.50639  | 0.834299 |
| Dbp     | NM_016974     | 13170  | 1.24957 | 3.65708  | 0.341685 |
| Zbtb21  | NM_175428     | 114565 | 1.246   | 2.20237  | 0.565754 |
| Zscan21 | NM_001044705  |        | 1.24319 | 2.17029  | 0.572822 |
| Zfp212  | NM_001145881  | 232784 | 1.23207 | 1.97009  | 0.625388 |
| Tardbp  | NM_001008546  | 230908 | 1.22102 | 1.02124  | 1.195625 |
| Sirt6   | NM_001163430  | 50721  | 1.21266 | 0.903474 | 1.342219 |
| Zxdb    | NM_001081473  | 668166 | 1.20601 | 1.15403  | 1.045042 |
| Hbp1    | NM_177993     | 73389  | 1.20087 | 1.54428  | 0.777625 |
| Arid4b  | NM_198122     | 94246  | 1.18485 | 1.42638  | 0.830669 |
| Zfp235  | NM_019941     | 56525  | 1.18172 | 1.35889  | 0.869622 |
| Zfp467  | NM_001085417  |        | 1.16808 | 3.17106  | 0.368356 |
| Meis2   | NM_010825     | 17536  | 1.16255 | 1.19293  | 0.974533 |
| Zfp60   | NM_029531     |        | 1.16134 | 1.72349  | 0.67383  |
| Trip4   | NM_001170907  | 56404  | 1.15848 | 1.60628  | 0.721219 |
| Zfp780b | NM_001081021  | 338354 | 1.1525  | 1.25956  | 0.915002 |
| Sp100   | NM_013673     | 20684  | 1.15192 | 0.961723 | 1.197767 |
| Zfp874a | NM_177712     |        | 1.14988 | 1.39302  | 0.825458 |
| Mlx     | NM_001159384  | 21428  | 1.14719 | 1.21562  | 0.943708 |
| Crebl2  | NM_177687     | 232430 | 1.13951 | 1.40377  | 0.81175  |
| Plag1   | NM_019969     | 56711  | 1.1317  | 1.08088  | 1.047017 |
| Arid3b  | NM_019689     | 56380  | 1.13035 | 1.62262  | 0.69662  |
| Zfp322a | NM_001111107  | 218100 | 1.12657 | 1.43004  | 0.787789 |
| Orc2    | NM_001271526  | 18393  | 1.11589 | 1.11848  | 0.997684 |
| Zfp846  | NM_172919     |        | 1.11587 | 1.52007  | 0.734091 |
| Zfp772  | NM_145577     | 232855 | 1.10857 | 1.00552  | 1.102484 |
| Zfp788  | NM_023363     | 67607  | 1.10683 | 1.28935  | 0.85844  |
| Ankle2  | NM_027922     | 71782  | 1.10582 | 0.9635   | 1.147711 |
| Zfp688  | NM_026999     | 69234  | 1.10354 | 1.79369  | 0.615235 |
| Gm13152 | NM_001039209  | 195531 | 1.1009  | 2.3524   | 0.46799  |
| Jarid2  | NM_021878     |        | 1.09657 | 1.12202  | 0.977318 |
| Zfp945  | NM_177358     | 240041 | 1.09001 | 1.01224  | 1.07683  |
| Zbtb37  | NM_173424     | 240869 | 1.08935 | 1.00091  | 1.08836  |
| Zfp820  | NM_029281     | 75424  | 1.08778 | 1.08443  | 1.003089 |
| Zfp322a | NM_172586     | 218100 | 1.08286 | 2.04425  | 0.52971  |
| Zfp707  | NM_001081065  | 69020  | 1.07822 | 1.74844  | 0.616675 |
| Tfap4   | NM_031182     | 83383  | 1.07389 | 1.48099  | 0.725116 |
| Tcf7    | NM_009331     | 21414  | 1.05819 | 3.02275  | 0.350075 |
| Etohi1  | NM_001177399  | 626848 | 1.05656 | 1.44492  | 0.731224 |
| Bard1   | NM_007525     | 12021  | 1.05624 | 1.06247  | 0.994136 |
| Tub     | NM_021885     | 22141  | 1.05146 | 0.719144 | 1.462099 |
| Zfp467  | NM_001085415  |        | 1.04788 | 1.84057  | 0.569324 |
| Zfp935  | NM_178875     | 71508  | 1.04603 | 2.05186  | 0.509796 |

|                |              |        |          |          |          |
|----------------|--------------|--------|----------|----------|----------|
| Zfp930         | NM_001013379 | 234358 | 1.02569  | 2.07361  | 0.49464  |
| Zfp444         | NM_028316    |        | 1.02355  | 1.30409  | 0.784877 |
| Zfp444         | NM_001146024 |        | 1.02315  | 1.22495  | 0.835259 |
| Zfp647         | NM_172817    | 239546 | 1.01407  | 1.08232  | 0.936941 |
| Lhx6           | NM_001083125 | 16874  | 1.0089   | 1.72609  | 0.5845   |
| Tox3           | NM_172913    | 244579 | 1.0068   | 4.74863  | 0.212019 |
| Mycl           | NM_008506    |        | 0.997924 | 1.54987  | 0.643876 |
| Zfp784         | NM_001039532 | 654801 | 0.997046 | 1.50999  | 0.6603   |
| 2610305D13Rik  | NM_145078    | 112422 | 0.990803 | 1.76866  | 0.5602   |
| Zfp691         | NM_001145936 |        | 0.982339 | 2.01704  | 0.48702  |
| Ankra2         | NM_001271388 | 68558  | 0.968715 | 1.30327  | 0.743296 |
| 2610044O15Rik8 | NM_153780    | 72139  | 0.95596  | 2.06102  | 0.463829 |
| Zfp810         | NM_145612    | 235050 | 0.954126 | 2.19316  | 0.435046 |
| Mga            | NM_001164274 | 29808  | 0.950063 | 0.813574 | 1.167765 |
| Kdm5d          | NM_011419    | 20592  | 0.948953 | 1.40562  | 0.675113 |
| Foxq1          | NM_008239    | 15220  | 0.940247 | 0.754765 | 1.245748 |
| Irx4           | NM_018885    |        | 0.938598 | 10.747   | 0.087336 |
| Zfp938         | NM_001105557 |        | 0.938204 | 2.74641  | 0.341611 |
| Smarcc2        | NM_001114096 | 68094  | 0.927684 | 3.71848  | 0.249479 |
| Zfp1           | NM_011742    | 22640  | 0.922935 | 1.36018  | 0.678539 |
| Zfp808         | NM_001039239 | 630579 | 0.922824 | 1.27232  | 0.725308 |
| Zfp229         | NM_001164676 | 381067 | 0.916705 | 0.899646 | 1.018962 |
| Ldb2           | NM_001077398 | 16826  | 0.903031 | 2.33794  | 0.386251 |
| Repin1         | NM_001079904 |        | 0.902444 | 0.967026 | 0.933216 |
| Zfp658         | NM_001008549 | 210104 | 0.888952 | 0.670422 | 1.325959 |
| Zfp68          | NM_001163797 | 24135  | 0.88774  | 0.816536 | 1.087203 |
| Repin1         | NM_001079901 |        | 0.879586 | 1.31157  | 0.670636 |
| Zfp560         | NM_001004190 | 434377 | 0.876858 | 1.0452   | 0.838938 |
| Zscan12        | NM_016684    | 22758  | 0.868253 | 1.10203  | 0.787867 |
| Zfp316         | NM_017467    | 54201  | 0.867918 | 0.970437 | 0.894358 |
| Hdac7          | NM_001204276 | 56233  | 0.86049  | 1.76994  | 0.486169 |
| Zfp672         | NM_001256517 |        | 0.858359 | 1.602    | 0.535805 |
| Sirt5          | NM_178848    | 68346  | 0.849119 | 5.93256  | 0.143129 |
| Zfp85          | NM_001001130 | 22746  | 0.848328 | 0.957102 | 0.886351 |
| Tcf7l2         | NM_009333    | 21416  | 0.8433   | 0.596812 | 1.413008 |
| Zcchc4         | NM_030185    | 78796  | 0.841654 | 1.24429  | 0.676413 |
| Zfp57          | NM_001168501 |        | 0.827356 | 0        | #DIV/0!  |
| Zfp324         | NM_178732    |        | 0.826729 | 1.07797  | 0.766931 |
| Zfp40          | NM_009555    | 22700  | 0.824759 | 1.04701  | 0.787728 |
| Lcorl          | NM_172153    | 209707 | 0.819316 | 0.943979 | 0.867939 |
| Zfp945         | NM_001110254 | 240041 | 0.804815 | 1.17874  | 0.682776 |
| Zfp59          | NM_011762    | 22717  | 0.793083 | 1.09148  | 0.726612 |
| Nr1h3          | NM_001177730 |        | 0.792365 | 0.889835 | 0.890463 |
| Lcorl          | NM_001163073 | 209707 | 0.787264 | 1.22662  | 0.641816 |
| Zfp30          | NM_013705    | 22693  | 0.785179 | 1.58666  | 0.494863 |
| Zfp157         | NM_028130    | 72154  | 0.7819   | 0.990756 | 0.789195 |

|          |              |        |          |          |          |
|----------|--------------|--------|----------|----------|----------|
| Hoxb3    | NM_001079869 |        | 0.779605 | 0.757439 | 1.029264 |
| Zfp933   | NM_198619    | 242747 | 0.772924 | 1.18615  | 0.651624 |
| Irf6     | NM_016851    | 54139  | 0.771287 | 0.988703 | 0.7801   |
| Zscan22  | NM_001001447 | 232878 | 0.768178 | 1.16646  | 0.658555 |
| Ybx2     | NM_016875    | 53422  | 0.767415 | 3.76937  | 0.203592 |
| Med16    | NM_001163276 | 216154 | 0.763873 | 0.786522 | 0.971204 |
| Zfp27    | NM_001037707 |        | 0.762225 | 1.73017  | 0.440549 |
| Zfp691   | NM_183140    |        | 0.750351 | 0.854982 | 0.877622 |
| Zfp867   | NM_178417    | 237775 | 0.748261 | 1.32206  | 0.565981 |
| Ighmbp2  | NM_009212    | 20589  | 0.730992 | 0.984508 | 0.742495 |
| Zfp961   | NM_001164581 | 234413 | 0.730022 | 1.527    | 0.478076 |
| Zfp568   | NM_001033355 | 243905 | 0.726094 | 1.32535  | 0.547851 |
| Zfp354a  | NM_009329    | 21408  | 0.72444  | 0.595324 | 1.216884 |
| Repin1   | NM_175099    |        | 0.724054 | 0.49394  | 1.465874 |
| Gm14326  | NM_001190302 | 665001 | 0.718823 | 0.870925 | 0.825356 |
| Zfp53    | NM_013843    | 24132  | 0.709199 | 0.939174 | 0.755131 |
| Tcf7l2   | NM_001142919 | 21416  | 0.706623 | 0.637077 | 1.109164 |
| Zfp799   | NM_177359    | 240064 | 0.705768 | 1.11595  | 0.632437 |
| Zfp13    | NM_011747    | 22654  | 0.70522  | 1.27016  | 0.555221 |
| Klf15    | NM_023184    |        | 0.704972 | 1.77293  | 0.397631 |
| Bhlhe41  | NM_024469    | 79362  | 0.702201 | 1.87405  | 0.374697 |
| Zfp341   | NM_199304    | 228807 | 0.701637 | 1.04945  | 0.668576 |
| Camta1   | NM_001081557 | 100072 | 0.695983 | 4.31562  | 0.161271 |
| Ctcf1    | NM_001081387 | 664799 | 0.693716 | 0.462567 | 1.499709 |
| Hdx      | NM_001080549 | 245596 | 0.692183 | 0.537957 | 1.286688 |
| Zfp691   | NM_001145935 |        | 0.684051 | 0.655491 | 1.04357  |
| Stat1    | NM_001205314 | 20846  | 0.683579 | 0.820672 | 0.83295  |
| Irf7     | NM_001252601 | 54123  | 0.671737 | 0.638018 | 1.05285  |
| Nrf1     | NM_001164229 | 18181  | 0.669251 | 0.479402 | 1.396012 |
| Ppargc1b | NM_133249    | 170826 | 0.668732 | 3.55831  | 0.187935 |
| Gmeb1    | NM_001122992 |        | 0.668269 | 0.59247  | 1.127937 |
| Meis1    | NM_010789    | 17268  | 0.667821 | 0.790935 | 0.844344 |
| Zfp120   | NM_181266    | 104348 | 0.664365 | 1.16026  | 0.5726   |
| Rsl1     | NM_001013769 | 380855 | 0.663109 | 1.12788  | 0.587925 |
| Zfp207   | NM_001130169 | 22680  | 0.662542 | 18.724   | 0.035385 |
| Zfp446   | NM_001168562 | 269870 | 0.656221 | 0.565682 | 1.160053 |
| Sall3    | NM_178280    | 20689  | 0.655745 | 0.492763 | 1.330751 |
| Zik1     | NM_009577    | 22775  | 0.655492 | 0.770577 | 0.850651 |
| Zfp949   | NM_001142943 |        | 0.655047 | 0.554014 | 1.182365 |
| Phf8     | NM_177201    | 320595 | 0.65339  | 0.637664 | 1.024662 |
| Zbtb3    | NM_001098237 | 75291  | 0.650341 | 0.795746 | 0.817272 |
| Grhl1    | NM_001161406 | 195733 | 0.647424 | 0.968823 | 0.668258 |
| Zfp329   | NM_026046    | 67230  | 0.641267 | 0.918727 | 0.697995 |
| Patz1    | NM_001253690 | 56218  | 0.638464 | 0.818146 | 0.780379 |
| Rbak     | NM_021326    |        | 0.637209 | 0.607301 | 1.049247 |
| Zfp39    | NM_011758    | 22698  | 0.626612 | 0.796623 | 0.786585 |

|               |              |           |          |          |          |
|---------------|--------------|-----------|----------|----------|----------|
| Zfp605        | NM_001163996 | 675812    | 0.62478  | 1.3925   | 0.448675 |
| Zfp760        | NM_001008501 | 240034    | 0.623804 | 0.824498 | 0.756586 |
| Pms1          | NM_153556    | 227099    | 0.622091 | 0.782847 | 0.794652 |
| Tox           | NM_145711    | 252838    | 0.609506 | 1.1303   | 0.539243 |
| Sox6          | NM_001025559 | 20679     | 0.609028 | 0.814984 | 0.747288 |
| Zfp607        | NM_001024726 | 545938    | 0.604323 | 0.967931 | 0.624345 |
| Ppp1r1b       | NM_144828    | 19049     | 0.593337 | 11.918   | 0.049785 |
| Irx1          | NM_010573    | 16371     | 0.591806 | 3.08271  | 0.191976 |
| Meis2         | NM_001159567 | 17536     | 0.584369 | 0.747824 | 0.781426 |
| Wiz           | NM_011717    | 22404     | 0.581072 | 0.961555 | 0.604304 |
| Irx2          | NM_010574    | 16372     | 0.580008 | 1.97904  | 0.293075 |
| Gm14322       | NM_001243903 | 626802    | 0.573364 | 0.453805 | 1.263459 |
| Tbx5          | NM_011537    | 21388     | 0.569986 | 7.14428  | 0.079782 |
| Zbtb16        | NM_001033324 | 235320    | 0.556491 | 1.38806  | 0.400913 |
| Irf4          | NM_013674    | 16364     | 0.554998 | 0.436308 | 1.272033 |
| Gata3         | NM_008091    | 14462     | 0.553429 | 0.529448 | 1.045294 |
| Tbx3          | NM_011535    | 21386     | 0.552552 | 2.34794  | 0.235335 |
| Zbtb26        | NM_199025    | 320633    | 0.54974  | 0.736627 | 0.746294 |
| Zfhx2         | NM_001039198 | 239102    | 0.542064 | 1.08309  | 0.500479 |
| Zfp111        | NM_019940    | 56707     | 0.540858 | 0.764999 | 0.707005 |
| Hoxa3         | NM_010452    | 15400     | 0.535915 | 1.02531  | 0.522686 |
| Zfp947        | NM_177596    | 210853    | 0.534246 | 0.601237 | 0.888578 |
| Six4          | NM_011382    | 20474     | 0.533455 | 0.836175 | 0.637971 |
| A1987944      | NM_001199330 | 233168    | 0.530124 | 1.17197  | 0.452336 |
| Zfp184        | NM_183014    |           | 0.524948 | 0.552672 | 0.949836 |
| Zfp672        | NM_001256518 |           | 0.521835 | 1.10613  | 0.471766 |
| Zfp3          | NM_177565    | 193043    | 0.518903 | 2.04944  | 0.253193 |
| Homez         | NM_001177705 |           | 0.503343 | 0.67472  | 0.746003 |
| Gm13212       | NM_001205101 | 433801    | 0.503294 | 1.06379  | 0.473114 |
| Zfp839        | NM_001199785 | 72805     | 0.501682 | 0.776085 | 0.646427 |
| Tcf20         | NM_001114140 | 21411     | 0.499976 | 1.99884  | 0.250133 |
| Zfp398        | NM_027477    | 272347    | 0.497003 | 0.817056 | 0.608285 |
| Zfp54         | NM_011760    |           | 0.494504 | 0.391749 | 1.262298 |
| Tfdp2         | NM_178667    | 211586    | 0.485274 | 0.457433 | 1.060864 |
| Pias3         | NM_018812    | 229615    | 0.476916 | 0.401653 | 1.187383 |
| Ankra2        | NM_001271389 | 68558     | 0.473133 | 0.485611 | 0.974305 |
| Aff2          | NM_008032    | 14266     | 0.472698 | 1.42236  | 0.332334 |
| Zfp873        | NM_001024626 | 408062    | 0.47093  | 1.35995  | 0.346285 |
| Thrsp         | NM_009381    | 21835     | 0.462094 | 2.24922  | 0.205446 |
| Nr5a2         | NM_001159769 |           | 0.461062 | 3.88073  | 0.118808 |
| Zkscan4       | NM_001039115 | 544922    | 0.4578   | 0.663108 | 0.690385 |
| 9130023H24Rik | NM_177001    | 100043133 | 0.44925  | 0.956549 | 0.469657 |
| Zfp677        | NM_172486    |           | 0.442472 | 0.320398 | 1.381007 |
| Gm5595        | NM_001008427 | 434179    | 0.439504 | 0.827469 | 0.531143 |
| Zfp386        | NM_001004066 | 56220     | 0.435178 | 1.73895  | 0.250253 |
| Gtf2i         | NM_001080746 | 14886     | 0.433892 | 1.03696  | 0.418427 |



|          |              |        |          |          |          |
|----------|--------------|--------|----------|----------|----------|
| Hoxb4    | NM_010459    | 15412  | 0.433707 | 1.0477   | 0.413961 |
| Zfp41    | NM_001044718 |        | 0.431113 | 1.22026  | 0.353296 |
| Lhx2     | NM_010710    | 16870  | 0.429395 | 0.292043 | 1.470314 |
| Bnc1     | NM_007562    | 12173  | 0.426587 | 0.38884  | 1.097076 |
| Crem     | NM_001271506 | 12916  | 0.425616 | 0.304674 | 1.396955 |
| Phox2a   | NM_008887    | 11859  | 0.424763 | 0.550392 | 0.771746 |
| Zscan20  | NM_177758    | 269585 | 0.424209 | 0.436022 | 0.972907 |
| Zfp128   | NM_153802    | 243833 | 0.422268 | 0.76686  | 0.550645 |
| Crem     | NM_001110852 | 12916  | 0.422202 | 0.547587 | 0.771023 |
| Zfp473   | NM_178734    |        | 0.421529 | 0.342568 | 1.230497 |
| Lhx6     | NM_001083127 | 16874  | 0.421201 | 0.846486 | 0.497588 |
| Zfp383   | NM_172740    |        | 0.420098 | 0.52173  | 0.805202 |
| Zfp672   | NM_001256520 |        | 0.419375 | 0.661404 | 0.634068 |
| Zfp113   | NM_019747    | 56314  | 0.418189 | 0.572955 | 0.729881 |
| Cebpe    | NM_207131    | 110794 | 0.416096 | 0.352826 | 1.179324 |
| Ppara    | NM_001113418 |        | 0.412798 | 0.970109 | 0.425517 |
| Rbpj     | NM_001080928 |        | 0.410301 | 0        | #DIV/0!  |
| Zbtb44   | NM_172765    | 235132 | 0.405385 | 0.943944 | 0.429459 |
| Zfp286   | NM_138949    | 192651 | 0.402166 | 0.384664 | 1.045499 |
| Thrb     | NM_001113417 | 21834  | 0.398601 | 0.326297 | 1.22159  |
| Gtf2ird1 | NM_001081464 | 57080  | 0.394566 | 2.68293  | 0.147065 |
| Repin1   | NM_001079902 |        | 0.394394 | 0.836711 | 0.471362 |
| Zfp775   | NM_173429    | 243372 | 0.391545 | 0.690713 | 0.566871 |
| Vdr      | NM_009504    | 22337  | 0.39045  | 0.555987 | 0.702265 |
| Prdm6    | NM_001033281 | 225518 | 0.388591 | 0.841969 | 0.461526 |
| Camta2   | NM_178116    |        | 0.387451 | 0.497442 | 0.778887 |
| Atf5     | NM_030693    | 107503 | 0.382426 | 0.580902 | 0.658331 |
| Cux2     | NM_007804    |        | 0.375965 | 1.19503  | 0.314607 |
| Zfp62    | NM_001024846 |        | 0.372029 | 0.504611 | 0.737259 |
| Meis2    | NM_001159570 | 17536  | 0.371162 | 0.296049 | 1.253718 |
| Zfp738   | NM_001001187 | 408068 | 0.370221 | 0.665911 | 0.555962 |
| Zfp458   | NM_001001152 | 238690 | 0.369926 | 0.436408 | 0.847661 |
| Hoxd8    | NM_008276    | 15437  | 0.365752 | 0.577758 | 0.633054 |
| Zfp595   | NM_177622    | 218314 | 0.365121 | 0.482773 | 0.7563   |
| Zfp11    | NM_172462    | 22648  | 0.364437 | 0.62875  | 0.579621 |
| Nfe2     | NM_008685    |        | 0.364268 | 0.909096 | 0.400693 |
| Smad5    | NM_001164041 |        | 0.363808 | 0.384223 | 0.946867 |
| Ikzf4    | NM_011772    | 22781  | 0.362062 | 0.447276 | 0.809482 |
| Zfp940   | NM_173738    | 233057 | 0.361327 | 0.36102  | 1.00085  |
| Zfp661   | NM_028141    |        | 0.358366 | 0.29953  | 1.196428 |
| Rorc     | NM_011281    | 19885  | 0.355109 | 4.32471  | 0.082112 |
| Eaf2     | NM_134111    | 106389 | 0.349702 | 0.360217 | 0.970809 |
| Gtf2i    | NM_001080747 | 14886  | 0.349088 | 0.408356 | 0.854862 |
| Zfp287   | NM_133208    | 170740 | 0.347186 | 0.515332 | 0.673713 |
| Zfp433   | NM_001243067 | 73610  | 0.324995 | 0.305274 | 1.064601 |
| Zscan21  | NM_001044704 |        | 0.321853 | 0.30791  | 1.045283 |

|               |              |        |          |          |          |
|---------------|--------------|--------|----------|----------|----------|
| Asb12         | NM_080858    | 70392  | 0.320782 | 3.44809  | 0.093032 |
| Zfp708        | NM_001012448 | 432769 | 0.320606 | 0.303498 | 1.056369 |
| AI987944      | NM_183167    | 233168 | 0.310375 | 0.467748 | 0.663552 |
| 3110052M02Rik | NM_001166497 | 73229  | 0.309661 | 0.404774 | 0.765022 |
| Sox6          | NM_001025560 | 20679  | 0.308463 | 0.879548 | 0.350706 |
| Ahrr          | NM_009644    | 11624  | 0.307139 | 1.59319  | 0.192782 |
| Creb3l4       | NM_030080    |        | 0.305206 | 0.33524  | 0.91041  |
| Tlx1          | NM_021901    | 21908  | 0.304916 | 0.913739 | 0.333701 |
| Zfp931        | NM_001162922 | 353208 | 0.302896 | 0.75629  | 0.400502 |
| Ikzf1         | NM_001025597 | 22778  | 0.300922 | 0.526794 | 0.571233 |
| Zfp790        | NM_001145880 |        | 0.300692 | 0.598903 | 0.502071 |
| Pou2f1        | NM_011137    | 18986  | 0.298596 | 0.373709 | 0.799007 |
| Tfcp2l1       | NM_023755    | 81879  | 0.298219 | 0.381787 | 0.781114 |
| Runx1         | NM_009821    | 12394  | 0.298206 | 0.40774  | 0.731363 |
| Klf8          | NM_173780    |        | 0.296379 | 0.418789 | 0.707705 |
| Esrrg         | NM_011935    |        | 0.291174 | 3.24445  | 0.089745 |
| Zfp709        | NM_145624    | 236193 | 0.290077 | 0.276519 | 1.049031 |
| Rfx3          | NM_001166414 | 19726  | 0.28999  | 0.330066 | 0.878582 |
| Smad9         | NM_019483    | 55994  | 0.289075 | 0.298951 | 0.966964 |
| Zfp563        | NM_001024950 | 240068 | 0.28625  | 0.357345 | 0.801047 |
| Zfp14         | NM_178733    | 243906 | 0.285368 | 0.681628 | 0.418657 |
| Zfp937        | NM_001142411 | 245174 | 0.282772 | 0.290252 | 0.974229 |
| Nr1h3         | NM_013839    |        | 0.281983 | 0.208989 | 1.349272 |
| Zfp120        | NM_023266    | 104348 | 0.281633 | 0.440132 | 0.639883 |
| Prox2         | NM_175198    | 73422  | 0.280582 | 0.245978 | 1.140679 |
| Nr3c2         | NM_001083906 |        | 0.279919 | 1.10155  | 0.254114 |
| Zfp182        | NM_001111076 |        | 0.279722 | 0.194517 | 1.438034 |
| A430033K04Rik | NM_183025    | 243308 | 0.278634 | 0.649651 | 0.428898 |
| Zfp93         | NM_009567    | 22755  | 0.273984 | 0.687871 | 0.398307 |
| Zfp296        | NM_022409    | 63872  | 0.272926 | 0.376427 | 0.725044 |
| Gtf2ird1      | NM_020331    | 57080  | 0.270135 | 1.04378  | 0.258805 |
| Zfp951        | NM_001039231 | 626391 | 0.268486 | 0.24374  | 1.101526 |
| Zfp712        | NM_001166218 | 78251  | 0.267528 | 0.35817  | 0.74693  |
| Cdkn2a        | NM_009877    | 12578  | 0.259631 | 0.216525 | 1.199081 |
| Zkscan8       | NM_139141    | 93681  | 0.258582 | 0.964684 | 0.268048 |
| Nfe2l3        | NM_010903    | 18025  | 0.257131 | 0.504303 | 0.509874 |
| Foxd2         | NM_008593    | 17301  | 0.255175 | 0.394234 | 0.647268 |
| Zscan21       | NM_011757    |        | 0.253419 | 0.423923 | 0.597795 |
| Zfp219        | NM_027248    |        | 0.245231 | 0.68802  | 0.35643  |
| Zfp456        | NM_001001186 | 408065 | 0.245199 | 0.365465 | 0.670923 |
| Mta3          | NM_001171052 | 116871 | 0.24276  | 0.175798 | 1.380903 |
| Pou2f2        | NM_011138    | 18987  | 0.237216 | 0        | #DIV/0!  |
| Zfp182        | NM_001013387 |        | 0.231613 | 0.350195 | 0.661383 |
| Bhlha15       | NM_010800    | 17341  | 0.231605 | 0.156823 | 1.476856 |
| Zfp551        | NM_001033820 | 619331 | 0.231543 | 0.334333 | 0.692552 |
| Lef1          | NM_001276402 | 16842  | 0.22918  | 0.198925 | 1.152092 |

|               |              |        |          |          |          |
|---------------|--------------|--------|----------|----------|----------|
| Zfp41         | NM_011759    |        | 0.227227 | 0.312282 | 0.727634 |
| AU041133      | NM_001163064 | 216177 | 0.227077 | 0.493709 | 0.459941 |
| Zfp112        | NM_021307    | 57745  | 0.226349 | 0.595919 | 0.379832 |
| Eomes         | NM_010136    | 13813  | 0.225337 | 0.307693 | 0.732344 |
| Irf1          | NM_001159396 | 16362  | 0.224183 | 0.480939 | 0.466136 |
| Hmga1         | NM_001166545 |        | 0.220262 | 0.17041  | 1.292542 |
| Zfp27         | NM_011754    |        | 0.219721 | 0.281947 | 0.779299 |
| 2810021J22Rik | NM_172403    | 69944  | 0.218313 | 0.228936 | 0.953598 |
| Zkscan8       | NM_001251833 | 93681  | 0.214634 | 0.191059 | 1.123391 |
| Ppara         | NM_011144    |        | 0.213203 | 1.48668  | 0.143409 |
| Hoxa2         | NM_010451    | 15399  | 0.211859 | 0.504965 | 0.419552 |
| 1700049G17Rik | NM_028538    | 73430  | 0.20957  | 0.350241 | 0.598359 |
| Hoxa4         | NM_008265    | 15401  | 0.209016 | 0.597481 | 0.349829 |
| Lhx6          | NM_008500    | 16874  | 0.207086 | 0.653599 | 0.31684  |
| Zfp273        | NM_198322    | 212569 | 0.206128 | 0.341154 | 0.604208 |
| Zfp2          | NM_001044700 |        | 0.205888 | 0.212032 | 0.971023 |
| Zfp882        | NM_001166645 | 382019 | 0.201298 | 0.227161 | 0.886147 |
| Nr2f2         | NM_183261    | 11819  | 0.198507 | 0.346756 | 0.572469 |
| Zfp109        | NM_020262    | 56869  | 0.197365 | 0.393374 | 0.501724 |
| Zfp442        | NM_001177550 | 668923 | 0.195918 | 0.264048 | 0.741979 |
| Zfp791        | NM_001037745 | 244556 | 0.194991 | 0.263495 | 0.740018 |
| Klf1          | NM_010635    | 16596  | 0.192086 | 0.254936 | 0.753468 |
| Klf14         | NM_001135093 | 619665 | 0.186808 | 0.351685 | 0.53118  |
| C030039L03Rik | NM_001112731 | 112415 | 0.186407 | 0.208165 | 0.895477 |
| Zfp446        | NM_175558    | 269870 | 0.18639  | 0.264714 | 0.704118 |
| Stat1         | NM_001205313 | 20846  | 0.185621 | 0.422051 | 0.439807 |
| Ikzf2         | NM_011770    | 22779  | 0.18197  | 0.207598 | 0.87655  |
| AW146154      | NM_001033530 | 101835 | 0.181521 | 0.342532 | 0.529939 |
| Zfp454        | NM_172794    |        | 0.181192 | 0.261124 | 0.693893 |
| Zfp94         | NM_009568    | 22756  | 0.181076 | 0.292831 | 0.618363 |
| Orc2          | NM_001025378 | 18393  | 0.179474 | 0.451761 | 0.397276 |
| Rreb1         | NM_026830    |        | 0.178599 | 0.396886 | 0.450001 |
| Stat4         | NM_011487    |        | 0.178323 | 0.154548 | 1.153836 |
| Zfp418        | NM_146179    | 232854 | 0.178062 | 0.370157 | 0.481045 |
| Meis2         | NM_001159569 | 17536  | 0.176579 | 0.308752 | 0.571912 |
| Gata1         | NM_008089    | 14460  | 0.176353 | 0.183998 | 0.958451 |
| Batf2         | NM_028967    | 74481  | 0.175822 | 0.185007 | 0.950353 |
| Sox6          | NM_011445    | 20679  | 0.174898 | 0.23589  | 0.741439 |
| Gata5         | NM_008093    | 14464  | 0.173933 | 0.30206  | 0.575823 |
| Gabpb1        | NM_001271470 | 14391  | 0.173333 | 0.304289 | 0.569633 |
| Grhl3         | NM_001013756 | 230824 | 0.172661 | 0.366344 | 0.471308 |
| Stat5b        | NM_011489    |        | 0.172025 | 0.213789 | 0.804649 |
| Zfp108        | NM_018791    | 54678  | 0.171254 | 0.215771 | 0.793684 |
| Zfp459        | NM_177811    | 328274 | 0.170145 | 0.25975  | 0.655034 |
| Mlxipl        | NM_021455    | 58805  | 0.169085 | 0.876802 | 0.192843 |
| Zfp455        | NM_001048204 | 218311 | 0.165787 | 0.25067  | 0.661376 |

|          |              |           |          |          |          |
|----------|--------------|-----------|----------|----------|----------|
| Egr4     | NM_020596    | 13656     | 0.16575  | 0.165108 | 1.003888 |
| Esrrb    | NM_001159500 | 26380     | 0.164783 | 1.33377  | 0.123547 |
| Mtf2     | NM_001253880 | 17765     | 0.160586 | 0.195405 | 0.821811 |
| Lbx2     | NM_010692    | 16815     | 0.158102 | 0.179357 | 0.881493 |
| Crem     | NM_001271505 | 12916     | 0.149823 | 0.123643 | 1.211739 |
| Tardbp   | NM_001008545 | 230908    | 0.149293 | 0.142346 | 1.048804 |
| Hoxa1    | NM_010449    | 15394     | 0.148251 | 0.305914 | 0.484617 |
| Zfp763   | NM_028543    | 73451     | 0.144585 | 0.309271 | 0.467503 |
| Lhx9     | NM_001042577 | 16876     | 0.143532 | 0        | #DIV/0!  |
| Crem     | NM_001271503 | 12916     | 0.143295 | 0.106447 | 1.346163 |
| Prdm16   | NM_001177995 | 70673     | 0.141986 | 0.795778 | 0.178424 |
| Rslcan18 | NM_001256052 | 432770    | 0.141436 | 0.219607 | 0.644041 |
| Esrrg    | NM_001243792 |           | 0.140795 | 1.15855  | 0.121527 |
| Zfp759   | NM_172392    | 268670    | 0.140345 | 0.320612 | 0.437741 |
| Hand1    | NM_008213    | 15110     | 0.138885 | 0.547684 | 0.253586 |
| Zfp672   | NM_178761    |           | 0.136529 | 0.555339 | 0.245848 |
| Bcl11a   | NM_016707    | 14025     | 0.136212 | 0.430316 | 0.316539 |
| Spib     | NM_019866    | 272382    | 0.133315 | 0.258337 | 0.516051 |
| Gm14124  | NM_001142410 | 100216455 | 0.132639 | 0.108472 | 1.222795 |
| Zfp641   | NM_173769    | 239652    | 0.130609 | 0.669628 | 0.195047 |
| Zfp599   | NM_181419    | 235048    | 0.130146 | 0.21836  | 0.596016 |
| Zfp72    | NM_001081680 | 238722    | 0.129666 | 0.39058  | 0.331983 |
| Tfap2e   | NM_198960    | 332937    | 0.126958 | 0.089272 | 1.422151 |
| Mef2b    | NM_001045484 | 17259     | 0.121059 | 0.126894 | 0.954017 |
| Nudt12   | NM_026497    | 67993     | 0.120573 | 1.06624  | 0.113082 |
| Pou2f2   | NM_001163555 | 18987     | 0.119344 | 0.187325 | 0.637096 |
| Six1     | NM_009189    | 20471     | 0.119326 | 0.111715 | 1.068129 |
| Zfp934   | NM_175252    | 77117     | 0.119033 | 0.208102 | 0.571994 |
| Tfeb     | NM_011549    |           | 0.116977 | 0        | #DIV/0!  |
| Rfx8     | NM_001145660 | 619289    | 0.11523  | 0.316613 | 0.363946 |
| Mzf1     | NM_145819    |           | 0.113515 | 0.15378  | 0.738165 |
| Crem     | NM_001110859 | 12916     | 0.112059 | 0.271812 | 0.412267 |
| Zfp60    | NM_009560    |           | 0.110956 | 0.23003  | 0.482354 |
| T        | NM_009309    | 20997     | 0.108521 | 0.128685 | 0.843307 |
| Mitf     | NM_001178049 | 17342     | 0.107783 | 3.4801   | 0.030971 |
| Myb      | NM_010848    | 17863     | 0.107391 | 0.549115 | 0.195571 |
| Ankrd7   | NM_029202    | 75196     | 0.107368 | 0.085421 | 1.256927 |
| Crem     | NM_001110851 | 12916     | 0.107228 | 0.078063 | 1.373603 |
| Hoxb5    | NM_008268    | 15413     | 0.105338 | 0.290945 | 0.362055 |
| Zfp467   | NM_001085416 |           | 0.102764 | 0.097807 | 1.050679 |
| Zfp300   | NM_183185    | 245368    | 0.100295 | 0.075274 | 1.332401 |
| Mlxip    | NM_177582    | 208104    | 0.099942 | 0.178223 | 0.560771 |
| Zfp78    | NM_001025163 | 330463    | 0.098425 | 0.151702 | 0.648806 |
| Npas1    | NM_008718    | 18142     | 0.098403 | 0.110588 | 0.889818 |
| Arhgap17 | NM_001122642 | 70497     | 0.098097 | 0.108426 | 0.904734 |
| Sp5      | NM_022435    | 64406     | 0.098096 | 0.115254 | 0.85113  |

|         |              |        |          |          |          |
|---------|--------------|--------|----------|----------|----------|
| Bhlhe41 | NM_001271768 | 79362  | 0.095647 | 0.272259 | 0.351309 |
| Bcl11a  | NM_001159290 | 14025  | 0.094605 | 0.139236 | 0.67946  |
| Tbx15   | NM_009323    | 21384  | 0.094069 | 0.065359 | 1.439269 |
| Myrfl   | NM_001033333 | 237558 | 0.093763 | 0.177075 | 0.529509 |
| Elf3    | NM_007921    | 13710  | 0.092211 | 0.174546 | 0.528291 |
| Pgbd1   | NM_001162920 | 319207 | 0.090169 | 0.520349 | 0.173285 |
| Sox30   | NM_173384    | 214105 | 0.090005 | 0.082017 | 1.097392 |
| Hsf4    | NM_001256042 | 26386  | 0.088705 | 0.17872  | 0.496335 |
| Ovol1   | NM_019935    | 18426  | 0.08782  | 0.091945 | 0.955133 |
| Fbxo24  | NM_027708    | 71176  | 0.087721 | 0.10195  | 0.86043  |
| Isl1    | NM_021459    | 16392  | 0.086366 | 0.221295 | 0.390277 |
| Ppp1r27 | NM_026814    | 68701  | 0.084583 | 0.079932 | 1.05818  |
| Repin1  | NM_001079905 |        | 0.084169 | 0.125897 | 0.668556 |
| Bcl11a  | NM_001242934 | 14025  | 0.08286  | 0.408358 | 0.202909 |
| Pitx2   | NM_001042502 | 18741  | 0.082707 | 2.16834  | 0.038143 |
| Lef1    | NM_001276403 | 16842  | 0.082642 | 0.111921 | 0.738399 |
| Vax2    | NM_011912    | 24113  | 0.082242 | 0        | #DIV/0!  |
| Snai3   | NM_013914    | 30927  | 0.082052 | 0.490089 | 0.167422 |
| Hoxb3   | NM_010458    |        | 0.081748 | 0.203789 | 0.40114  |
| Zfp174  | NM_001081217 | 385674 | 0.081738 | 0.244132 | 0.334811 |
| Zkscan7 | NM_001177505 | 382118 | 0.081241 | 0.450419 | 0.180367 |
| Prdm16  | NM_027504    | 70673  | 0.079421 | 0.544224 | 0.145934 |
| Rxrg    | NM_009107    | 20183  | 0.079362 | 0.294411 | 0.269563 |
| Hes5    | NM_010419    | 15208  | 0.079246 | 0.105113 | 0.753913 |
| Lhx6    | NM_001083126 | 16874  | 0.078991 | 0.304624 | 0.259305 |
| Irx3    | NM_001253822 | 16373  | 0.077262 | 0.143861 | 0.537058 |
| Smad2   | NM_001252481 | 17126  | 0.07611  | 0        | #DIV/0!  |
| Kat7    | NM_177619    | 217127 | 0.075593 | 0.0616   | 1.227161 |
| Dlx5    | NM_010056    | 13395  | 0.074387 | 0.195388 | 0.380712 |
| Ehmt1   | NM_001109686 | 77683  | 0.073776 | 0.19492  | 0.378492 |
| Chgb    | NM_007694    | 12653  | 0.073708 | 0.124307 | 0.592952 |
| Ikzf1   | NM_009578    | 22778  | 0.073675 | 0.158055 | 0.466135 |
| Tbr1    | NM_009322    | 21375  | 0.0725   | 0.055797 | 1.299364 |
| Mkx     | NM_177595    | 210719 | 0.071895 | 0.079625 | 0.902924 |
| Esrrb   | NM_011934    | 26380  | 0.07077  | 0.209207 | 0.338278 |
| Hoxb9   | NM_008270    | 15417  | 0.068955 | 0.061081 | 1.128906 |
| Zfp773  | NM_029584    | 76373  | 0.068701 | 0.087917 | 0.78143  |
| Tead3   | NM_001204156 | 21678  | 0.067426 | 0.089577 | 0.752714 |
| Gbx2    | NM_010262    | 14472  | 0.066903 | 0.054304 | 1.232019 |
| Zfp114  | NM_001029933 | 232966 | 0.066851 | 0.0888   | 0.75283  |
| Zfp612  | NM_175480    | 234725 | 0.065969 | 0.677198 | 0.097415 |
| Grhl2   | NM_026496    | 252973 | 0.065361 | 0.270808 | 0.241354 |
| Sp4     | NM_001166385 | 20688  | 0.06453  | 0        | #DIV/0!  |
| Zfp457  | NM_001003666 | 431706 | 0.063512 | 0.153825 | 0.412884 |
| Bcl11b  | NM_021399    | 58208  | 0.062944 | 0.260452 | 0.241672 |
| Tfeb    | NM_001161723 |        | 0.062418 | 0.070089 | 0.890563 |

|          |              |           |          |          |          |
|----------|--------------|-----------|----------|----------|----------|
| Zkscan2  | NM_001081329 | 210162    | 0.060983 | 0.19721  | 0.309226 |
| Esr2     | NM_010157    | 13983     | 0.060173 | 0.098353 | 0.61181  |
| Zfp879   | NM_173387    | 214779    | 0.058455 | 0.120799 | 0.483903 |
| Ankrd45  | NM_028664    | 73844     | 0.05723  | 0.510773 | 0.112046 |
| Cers3    | NM_001164201 | 545975    | 0.056581 | 0.065799 | 0.859911 |
| Sowahb   | NM_175270    | 78088     | 0.056458 | 0.25879  | 0.218161 |
| Zfp354b  | NM_013744    | 27274     | 0.056287 | 0.166181 | 0.338711 |
| Insm1    | NM_016889    | 53626     | 0.056038 | 0.07447  | 0.752489 |
| Lef1     | NM_010703    | 16842     | 0.055472 | 0.279522 | 0.198452 |
| Satb1    | NM_009122    | 20230     | 0.054761 | 0.072485 | 0.755474 |
| Pou3f3   | NM_008900    | 18993     | 0.052713 | 0.063381 | 0.831683 |
| Foxg1    | NM_008241    |           | 0.051338 | 0.041718 | 1.230598 |
| Scrt1    | NM_130893    | 170729    | 0.051057 | 0.04022  | 1.269436 |
| Bhlhe22  | NM_021560    | 59058     | 0.05051  | 0.067129 | 0.752438 |
| Tfdp2    | NM_001184708 | 211586    | 0.050504 | 0        | #DIV/0!  |
| Ciita    | NM_001243760 | 12265     | 0.048564 | 0.035938 | 1.351322 |
| Lhx4     | NM_010712    | 16872     | 0.047593 | 0        | #DIV/0!  |
| Gm2026   | NM_001177543 | 100039060 | 0.04653  | 0.06186  | 0.752177 |
| Nr0b2    | NM_011850    | 23957     | 0.046135 | 1.16208  | 0.0397   |
| Rfx2     | NM_027787    | 19725     | 0.045616 | 0.05593  | 0.815585 |
| Lhx1     | NM_008498    | 16869     | 0.045059 | 0.041163 | 1.094666 |
| Msx2     | NM_013601    | 17702     | 0.043794 | 0.106643 | 0.410662 |
| Zkscan8  | NM_001251834 | 93681     | 0.043641 | 0.076817 | 0.568122 |
| Alx4     | NM_007442    | 11695     | 0.04327  | 0.046026 | 0.940127 |
| Sox3     | NM_009237    | 20675     | 0.042205 | 0.219117 | 0.192613 |
| Rxrg     | NM_001159731 | 20183     | 0.041461 | 0.616822 | 0.067217 |
| Nkx6-1   | NM_144955    | 18096     | 0.040286 | 0.059432 | 0.677851 |
| Zfp786   | NM_177882    | 330301    | 0.038254 | 0.083509 | 0.458077 |
| Zic2     | NM_009574    | 22772     | 0.036363 | 0.041419 | 0.877923 |
| Dlx1     | NM_010053    | 13390     | 0.036203 | 0.037004 | 0.978346 |
| Isx      | NM_027837    | 71597     | 0.035876 | 0.035725 | 1.004227 |
| Nr2e3    | NM_013708    | 23958     | 0.035781 | 0        | #DIV/0!  |
| Rhox8    | NM_001004193 | 434768    | 0.035165 | 0.037307 | 0.942584 |
| Zfp493   | NM_028402    | 72958     | 0.035124 | 0.056017 | 0.627013 |
| Gm13247  | NM_001243138 | 102641165 | 0.035093 | 0.036644 | 0.957676 |
| Sox2     | NM_011443    | 20674     | 0.034971 | 0.04646  | 0.752711 |
| Nkx2-1   | NM_001146198 |           | 0.034729 | 0.032293 | 1.07545  |
| Arx      | NM_007492    |           | 0.034072 | 0.02641  | 1.290157 |
| Ralgapa1 | NM_019994    | 56784     | 0.033995 | 0.047848 | 0.710488 |
| Sp6      | NM_031183    |           | 0.033993 | 0.096384 | 0.352683 |
| Dmrta1   | NM_175647    | 242523    | 0.033488 | 0.081614 | 0.410316 |
| Fev      | NM_153111    | 260298    | 0.033365 | 0.088553 | 0.376774 |
| Eaf2     | NM_001113401 | 106389    | 0.033328 | 0.035363 | 0.942445 |
| Lin28b   | NM_001031772 | 380669    | 0.033292 | 0.094065 | 0.35392  |
| Sox21    | NM_177753    | 223227    | 0.032035 | 0.034599 | 0.925904 |
| Zfp94    | NM_001199321 | 22756     | 0.031876 | 0.064601 | 0.493424 |

|          |              |           |          |          |          |
|----------|--------------|-----------|----------|----------|----------|
| Alx1     | NM_172553    |           | 0.031284 | 0.03325  | 0.940867 |
| Mixl1    | NM_013729    | 27217     | 0.030873 | 0        | #DIV/0!  |
| Pitx2    | NM_001042504 | 18741     | 0.030565 | 0.869511 | 0.035152 |
| Pou6f2   | NM_175006    | 218030    | 0.029934 | 0.029819 | 1.003877 |
| Nfatc2   | NM_001037177 | 18019     | 0.028302 | 0.093673 | 0.302137 |
| Bhlha9   | NM_177182    | 320522    | 0.028104 | 0        | #DIV/0!  |
| Gfi1b    | NM_008114    | 14582     | 0.028093 | 0.124356 | 0.225909 |
| Zfp352   | NM_153102    | 236537    | 0.027811 | 0.023089 | 1.204506 |
| Zfp661   | NM_001111029 |           | 0.027774 | 0.258209 | 0.107565 |
| Zfp536   | NM_172385    |           | 0.027392 | 0.318638 | 0.085965 |
| Insm2    | NM_020287    | 56856     | 0.027263 | 0.019762 | 1.379521 |
| Myf6     | NM_008657    | 17878     | 0.027031 | 0        | #DIV/0!  |
| Hoxb1    | NM_008266    | 15407     | 0.026688 | 0.035446 | 0.752936 |
| Hoxd3    | NM_010468    | 15434     | 0.026593 | 0.038871 | 0.684117 |
| Atoh7    | NM_016864    | 53404     | 0.026337 | 0        | #DIV/0!  |
| Nkx2-3   | NM_008699    | 18089     | 0.026206 | 0.029834 | 0.878397 |
| Rfx4     | NM_027689    | 71137     | 0.02574  | 0.02488  | 1.03457  |
| Rara     | NM_001177302 |           | 0.025639 | 0.06526  | 0.392881 |
| Rbpjl    | NM_009036    | 19668     | 0.025433 | 0.038013 | 0.669076 |
| Nanog    | NM_028016    |           | 0.024559 | 0.154767 | 0.158685 |
| Hsf3     | NM_172931    | 245525    | 0.024212 | 0.042872 | 0.56476  |
| Fank1    | NM_025850    | 66930     | 0.024185 | 0.032118 | 0.75301  |
| Myt1l    | NM_001093776 | 17933     | 0.023245 | 0        | #DIV/0!  |
| Nkx3-2   | NM_007524    | 12020     | 0.022983 | 0        | #DIV/0!  |
| Tulp2    | NM_008807    | 56734     | 0.022875 | 0.018215 | 1.255844 |
| Lin28a   | NM_145833    | 83557     | 0.021942 | 0.020415 | 1.074808 |
| Cml3     | NM_001037842 | 93674     | 0.021789 | 0.028932 | 0.753125 |
| Rhox6    | NM_008955    | 19202     | 0.021015 | 0.027824 | 0.755291 |
| Lmx1b    | NM_010725    | 16917     | 0.020836 | 0.018422 | 1.131057 |
| Pax1     | NM_008780    | 18503     | 0.02061  | 0        | #DIV/0!  |
| Foxp3    | NM_001199348 |           | 0.020592 | 0.019158 | 1.074874 |
| Rreb1    | NM_001039188 |           | 0.020536 | 0.041605 | 0.493583 |
| Rhox9    | NM_023894    | 104384    | 0.02051  | 0        | #DIV/0!  |
| Esx1     | NM_007957    | 13984     | 0.020355 | 0.033772 | 0.602708 |
| Nkx2-9   | NM_008701    | 18094     | 0.020123 | 0.05338  | 0.376976 |
| Sohlh2   | NM_028937    | 74434     | 0.020023 | 0        | #DIV/0!  |
| Hoxb7    | NM_010460    | 15415     | 0.019884 | 0.052748 | 0.376961 |
| Zfp78    | NM_177888    | 330463    | 0.01981  | 0        | #DIV/0!  |
| Zkscan16 | NM_001099323 | 100041581 | 0.019382 | 0.014717 | 1.316992 |
| Nr2e1    | NM_152229    | 21907     | 0.018971 | 0.01891  | 1.003236 |
| Hoxb6    | NM_008269    | 15414     | 0.018965 | 0.025159 | 0.753815 |
| Dach2    | NM_033605    | 93837     | 0.018556 | 0.018809 | 0.986549 |
| Zfp663   | NM_001005425 | 381405    | 0.0185   | 0.086055 | 0.214973 |
| Crxos    | NM_001145190 | 546024    | 0.017853 | 0.023557 | 0.757865 |
| Hnf1a    | NM_009327    | 21405     | 0.016859 | 0.016004 | 1.053417 |
| Foxa1    | NM_008259    | 15375     | 0.016854 | 0.028798 | 0.585232 |

|        |              |           |          |          |          |
|--------|--------------|-----------|----------|----------|----------|
| Bcl11b | NM_001079883 | 58208     | 0.016499 | 0.119002 | 0.138641 |
| Hsf5   | NM_001045527 | 327992    | 0.016387 | 0.014523 | 1.128353 |
| Dlx6   | NM_010057    | 13396     | 0.016185 | 0.021453 | 0.75444  |
| Mesp1  | NM_008588    | 17292     | 0.016077 | 0.031966 | 0.502945 |
| Lmx1a  | NM_033652    |           | 0.016049 | 0.012189 | 1.316701 |
| Trp63  | NM_001127265 | 22061     | 0.015833 | 0.039085 | 0.405083 |
| Trp63  | NM_001127262 | 22061     | 0.015554 | 0.01456  | 1.06824  |
| Foxl2  | NM_012020    | 26927     | 0.015462 | 0.016434 | 0.940849 |
| Foxe1  | NM_183298    | 110805    | 0.015411 | 0.020431 | 0.754305 |
| Cdx4   | NM_007674    | 12592     | 0.01532  | 0.020334 | 0.753392 |
| En1    | NM_010133    | 13798     | 0.015241 | 0        | #DIV/0!  |
| Utf1   | NM_009482    | 22286     | 0.014723 | 0.019521 | 0.754185 |
| Gsc    | NM_010351    | 14836     | 0.014516 | 0.028873 | 0.502764 |
| Lhx3   | NM_001039653 | 16871     | 0.014268 | 0.014214 | 1.003799 |
| Foxg1  | NM_001160112 |           | 0.01404  | 0        | #DIV/0!  |
| Ehf    | NM_007914    | 13661     | 0.013774 | 0.052646 | 0.261634 |
| Otx1   | NM_011023    | 18423     | 0.013683 | 0.02909  | 0.470348 |
| Bcl11a | NM_001159289 | 14025     | 0.013601 | 0.336192 | 0.040455 |
| Ovol2  | NM_152947    | 107586    | 0.013429 | 0.055582 | 0.241605 |
| Gsc2   | NM_029469    | 195333    | 0.013181 | 0        | #DIV/0!  |
| Zic3   | NM_009575    | 22773     | 0.013151 | 0.014985 | 0.87763  |
| Myod1  | NM_010866    | 17927     | 0.012957 | 0.017204 | 0.753108 |
| Ikzf3  | NM_011771    | 22780     | 0.01294  | 0.484109 | 0.02673  |
| Alx3   | NM_007441    | 11694     | 0.012857 | 0.011382 | 1.129648 |
| Zfp831 | NM_001099328 | 100043757 | 0.012049 | 0.027044 | 0.445548 |
| Pou4f1 | NM_011143    | 18996     | 0.012013 | 0.013307 | 0.902759 |
| Gcm1   | NM_008103    | 14531     | 0.011702 | 0.015542 | 0.752961 |
| Atoh1  | NM_007500    | 11921     | 0.01136  | 0        | #DIV/0!  |
| Crem   | NM_001110850 | 12916     | 0.011236 | 0.256158 | 0.043863 |
| Vgll2  | NM_153786    | 215031    | 0.011234 | 0.052175 | 0.215306 |
| Foxa2  | NM_010446    | 15376     | 0.011145 | 0.009868 | 1.129346 |
| Olig1  | NM_016968    | 50914     | 0.010899 | 0.024128 | 0.451724 |
| Ptf1a  | NM_018809    | 19213     | 0.01088  | 0.028877 | 0.376754 |
| Pgr    | NM_008829    | 18667     | 0.010801 | 0.022983 | 0.469982 |
| Prrxl1 | NM_001001796 |           | 0.010547 | 0.020998 | 0.502298 |
| Lbx1   | NM_010691    | 16814     | 0.010523 | 0.013932 | 0.755293 |
| Foxe3  | NM_015758    | 30923     | 0.010477 | 0        | #DIV/0!  |
| Sim2   | NM_011377    | 20465     | 0.010375 | 0.030338 | 0.341966 |
| Fezf2  | NM_080433    | 54713     | 0.010218 | 0        | #DIV/0!  |
| Hoxc8  | NM_010466    | 15426     | 0.009916 | 0        | #DIV/0!  |
| Nkx3-1 | NM_010921    | 18095     | 0.009793 | 0.019522 | 0.501636 |
| Foxr1  | NM_001033469 | 382074    | 0.009727 | 0.012912 | 0.753305 |
| Hoxd13 | NM_008275    | 15433     | 0.009426 | 0.02922  | 0.322585 |
| Zic1   | NM_009573    |           | 0.009136 | 0.012143 | 0.752396 |
| Sall4  | NM_175303    | 99377     | 0.009096 | 0.101374 | 0.089731 |
| Pax3   | NM_001159520 | 18505     | 0.009061 | 0.007732 | 1.171844 |



|         |              |           |          |          |          |
|---------|--------------|-----------|----------|----------|----------|
| Rhox7a  | NM_001025086 |           | 0.008973 | 0        | #DIV/0!  |
| Pou5f1  | NM_001252452 | 18999     | 0.008885 | 0        | #DIV/0!  |
| Hoxb8   | NM_010461    | 15416     | 0.008808 | 0.050712 | 0.173683 |
| Vax1    | NM_009501    | 22326     | 0.008611 | 0        | #DIV/0!  |
| Six3    | NM_011381    | 20473     | 0.008276 | 0.011001 | 0.75232  |
| Gm13154 | NM_001014397 | 433804    | 0.008203 | 0.025435 | 0.322523 |
| Hoxa7   | NM_010455    |           | 0.008166 | 0.108443 | 0.075303 |
| Glrp1   | NM_008132    | 14659     | 0.008139 | 0        | #DIV/0!  |
| Ccdc79  | NM_180958    | 320022    | 0.00784  | 0.020836 | 0.376255 |
| St18    | NM_173868    |           | 0.007782 | 0.010373 | 0.750243 |
| Olig3   | NM_053008    | 94222     | 0.00767  | 0.010186 | 0.752942 |
| Dbx1    | NM_001005232 | 13172     | 0.007625 | 0        | #DIV/0!  |
| Pou4f3  | NM_138945    | 18998     | 0.007467 | 0.009901 | 0.75422  |
| Neurod2 | NM_010895    | 18013     | 0.007345 | 0.013015 | 0.564342 |
| Hmga1   | NM_001025427 |           | 0.00731  | 6.71158  | 0.001089 |
| Foxh1   | NM_007989    | 14106     | 0.007019 | 0.018617 | 0.377031 |
| Pax5    | NM_008782    | 18507     | 0.007019 | 0.083778 | 0.083785 |
| Hnf4a   | NM_008261    | 15378     | 0.006935 | 0.006914 | 1.002937 |
| Hoxa9   | NM_010456    | 15405     | 0.006916 | 0.022968 | 0.301124 |
| Fezf1   | NM_028462    | 73191     | 0.006799 | 0.013549 | 0.501858 |
| Dmrt3   | NM_177360    | 240590    | 0.006545 | 0        | #DIV/0!  |
| Nr1i2   | NM_001098404 | 18171     | 0.006493 | 0        | #DIV/0!  |
| Hoxc13  | NM_010464    | 15422     | 0.006423 | 0        | #DIV/0!  |
| Tbx19   | NM_032005    | 83993     | 0.005832 | 0        | #DIV/0!  |
| Tlx2    | NM_009392    | 21909     | 0.005759 | 0.038212 | 0.150724 |
| Gm13242 | NM_001103158 | 100041379 | 0.005703 | 0        | #DIV/0!  |
| Neurog3 | NM_009719    | 11925     | 0.005312 | 0.014101 | 0.376731 |
| Noto    | NM_001007472 | 384452    | 0.005082 | 0        | #DIV/0!  |
| Tbx10   | NM_011533    | 109575    | 0.005009 | 0.006651 | 0.753175 |
| Zfp936  | NM_001034893 | 668620    | 0.004957 | 0        | #DIV/0!  |
| Gsx2    | NM_133256    | 14843     | 0.004867 | 0        | #DIV/0!  |
| Rax     | NM_013833    | 19434     | 0.004854 | 0.025773 | 0.188325 |
| Foxr2   | NM_001034894 | 436240    | 0.004782 | 0        | #DIV/0!  |
| Gsx1    | NM_008178    | 14842     | 0.004541 | 0        | #DIV/0!  |
| Tbx22   | NM_145224    | 245572    | 0.004363 | 0.003862 | 1.12963  |
| Hoxd10  | NM_013554    | 15430     | 0.004329 | 0.005748 | 0.753117 |
| Nobox   | NM_130869    | 18291     | 0.004221 | 0.005605 | 0.753078 |
| Nkx1-2  | NM_009123    | 20231     | 0.004196 | 0.011145 | 0.376533 |
| Mesp2   | NM_008589    | 17293     | 0.004118 | 0.005468 | 0.753042 |
| Zscan5b | NM_133204    | 170734    | 0.004042 | 0        | #DIV/0!  |
| Hoxc4   | NM_013553    | 15423     | 0.004011 | 0.037285 | 0.107572 |
| Elf5    | NM_001145813 |           | 0.003699 | 0.014805 | 0.249877 |
| Cdx2    | NM_007673    | 12591     | 0.003681 | 0        | #DIV/0!  |
| Neurod6 | NM_009717    | 11922     | 0.003666 | 0        | #DIV/0!  |
| Hnf4g   | NM_013920    | 30942     | 0.003621 | 0.007221 | 0.501486 |
| Nkx6-3  | NM_029002    | 74561     | 0.003518 | 0.028042 | 0.125472 |

|          |              |           |          |          |          |
|----------|--------------|-----------|----------|----------|----------|
| Dmrt1    | NM_015826    | 50796     | 0.003493 | 0        | #DIV/0!  |
| Duxbl3   | NM_001177539 | 100039293 | 0.003359 | 0        | #DIV/0!  |
| Zic5     | NM_022987    | 65100     | 0.003284 | 0        | #DIV/0!  |
| Olig2    | NM_016967    | 50913     | 0.003206 | 0.004259 | 0.752721 |
| Prdm12   | NM_001123362 | 381359    | 0.003158 | 0.004196 | 0.752704 |
| Foxn1    | NM_008238    | 15218     | 0.003115 | 0        | #DIV/0!  |
| Bhlhe23  | NM_080641    | 140489    | 0.003092 | 0.004109 | 0.752682 |
| Crem     | NM_001110858 | 12916     | 0.003054 | 0.315894 | 0.009669 |
| Ubtfl1   | NM_001033793 | 546118    | 0.002943 | 0.00391  | 0.752628 |
| Zfp872   | NM_001033813 | 619310    | 0.002604 | 0        | #DIV/0!  |
| Foxn4    | NM_148935    | 116810    | 0.002595 | 0.003448 | 0.752507 |
| Sall4    | NM_201396    | 99377     | 0.002448 | 0.050198 | 0.048761 |
| Prdm13   | NM_001080771 | 230025    | 0.002418 | 0        | #DIV/0!  |
| Dach2    | NM_001142570 | 93837     | 0.002164 | 0.002419 | 0.894558 |
| Vsx1     | NM_054068    | 114889    | 0.002139 | 0        | #DIV/0!  |
| Sox1     | NM_009233    | 20664     | 0.001878 | 0.002496 | 0.75225  |
| Zfp868   | NM_001045553 | 234362    | 0.001874 | 1.6296   | 0.00115  |
| L3mbtl4  | NM_177278    | 320858    | 0.00165  | 0.006581 | 0.250724 |
| Ankar    | NM_176980    | 319695    | 0.001649 | 0.006577 | 0.250724 |
| Myt1     | NM_001171615 | 17932     | 0.001382 | 0.007484 | 0.184629 |
| Runx2    | NM_009820    | 12393     | 0.001225 | 0        | #DIV/0!  |
| Zfp2     | NM_001044698 |           | 0.001058 | 0.406138 | 0.002604 |
| Trp63    | NM_001127263 | 22061     | 0.00069  | 0.05059  | 0.013633 |
| Ciita    | NM_001243761 | 12265     | 0.00042  | 0.013084 | 0.032088 |
| Zfp169   | NM_026450    | 67911     | 0.000324 | 0.410785 | 0.000789 |
| Crx      | NM_007770    | 12951     | 0.000287 | 0.000293 | 0.980805 |
| Trp73    | NM_001126331 | 22062     | 0.000217 | 0        | #DIV/0!  |
| Gtf2ird1 | NM_001081467 | 57080     | 0.000158 | 0.000915 | 0.173202 |
| Sp110    | NM_175397    | 109032    | 0.000145 | 0.000217 | 0.66681  |
| Rreb1    | NM_001177868 |           | 0.000126 | 0        | #DIV/0!  |
| Pgbd1    | NM_001012311 | 319207    | 9.65E-05 | 0.069345 | 0.001392 |
| Gfi1     | NM_001267621 | 14581     | 8.90E-05 | 0.204315 | 0.000436 |
| Zfp14    | NM_011748    | 243906    | 6.64E-05 | 6.66E-05 | 0.996997 |
| Satb1    | NM_001163632 | 20230     | 6.57E-05 | 0.116274 | 0.000565 |
| Musk     | NM_001037130 | 18198     | 5.33E-05 | 0        | #DIV/0!  |
| Zbtb3    | NM_133759    | 75291     | 4.16E-05 | 0.000829 | 0.05017  |
| Nr5a2    | NM_030676    |           | 3.95E-05 | 3.98E-05 | 0.992462 |
| Tbx22    | NM_181319    | 245572    | 3.80E-05 | 3.86E-05 | 0.984456 |
| Zfp239   | NM_008616    |           | 3.49E-05 | 0.048861 | 0.000714 |
| Myt1     | NM_001171616 | 17932     | 2.88E-05 | 3.27E-05 | 0.880734 |
| Pax6     | NM_001244201 |           | 2.87E-05 | 0.005504 | 0.005214 |
| Grhl1    | NM_145890    | 195733    | 2.78E-05 | 2.88E-05 | 0.965278 |
| Myt1l    | NM_001093775 | 17933     | 2.78E-05 | 0.050793 | 0.000547 |
| Mitf     | NM_008601    | 17342     | 2.64E-05 | 0        | #DIV/0!  |
| Elf5     | NM_010125    |           | 2.04E-05 | 1.98E-05 | 1.030303 |
| Arid3c   | NM_001017362 | 550619    | 1.53E-05 | 1.58E-05 | 0.968354 |

|               |              |           |          |          |          |
|---------------|--------------|-----------|----------|----------|----------|
| Nr1i2         | NM_010936    | 18171     | 1.27E-05 | 0        | #DIV/0!  |
| Zfp647        | NM_001168276 | 239546    | 1.25E-05 | 1.35E-05 | 0.925926 |
| Tbx4          | NM_011536    | 21387     | 1.24E-05 | 0.044175 | 0.000281 |
| Gfi1b         | NM_001160406 | 14582     | 1.22E-05 | 0.029251 | 0.000417 |
| Nr1h5         | NM_198658    | 381463    | 1.20E-05 | 0.054118 | 0.000222 |
| Zfp446        | NM_001168561 | 269870    | 1.19E-05 | 2.03E-05 | 0.586207 |
| Zfp811        | NM_001267583 | 240063    | 1.08E-05 | 2.56E-05 | 0.421875 |
| Trp63         | NM_001127264 | 22061     | 9.26E-06 | 0        | #DIV/0!  |
| Esr2          | NM_207707    | 13983     | 7.85E-06 | 8.86E-05 | 0.0886   |
| St18          | NM_001244693 |           | 6.94E-06 | 6.23E-06 | 1.113965 |
| Eomes         | NM_001164789 | 13813     | 4.83E-06 | 7.26E-06 | 0.665289 |
| Tbx10         | NM_001001320 | 109575    | 4.76E-06 | 4.87E-06 | 0.977413 |
| Sall4         | NM_201395    | 99377     | 4.03E-06 | 0.011675 | 0.000345 |
| Barhl1        | NM_019446    | 54422     | 3.24E-06 | 0.019284 | 0.000168 |
| Tfap2c        | NM_001159696 |           | 3.21E-06 | 0.044422 | 7.23E-05 |
| Trp63         | NM_011641    | 22061     | 3.16E-06 | 0        | #DIV/0!  |
| C030039L03Rik | NM_198417    | 112415    | 2.36E-06 | 0.033292 | 7.09E-05 |
| Pax6          | NM_001244198 |           | 2.28E-06 | 0        | #DIV/0!  |
| Pax3          | NM_008781    | 18505     | 1.09E-06 | 0.0194   | 5.62E-05 |
| Gm13247       | NM_001243139 | 102641165 | 7.20E-07 | 0        | #DIV/0!  |
| Hoxd11        | NM_008273    | 15431     | 6.57E-07 | 0.007642 | 8.6E-05  |
| Dmbx1         | NM_130865    | 140477    | 6.22E-07 | 0.002016 | 0.000309 |
| Rfx4          | NM_001024918 | 71137     | 5.80E-07 | 5.50E-07 | 1.054545 |
| Nkx2-1        | NM_009385    |           | 5.36E-07 | 4.82E-07 | 1.112033 |
| Tulp2         | NM_001045555 | 56734     | 4.13E-07 | 7.13E-06 | 0.057924 |
| Pou5f1        | NM_013633    | 18999     | 3.53E-07 | 0        | #DIV/0!  |
| Crxos         | NM_001033638 | 546024    | 1.94E-07 | 0        | #DIV/0!  |
| Tfap2b        | NM_001025305 | 21419     | 1.07E-07 | 0.000441 | 0.000243 |
| Rhox12        | NM_001025083 | 382282    | 0        | 0.012637 | 0        |
| Musk          | NM_001037127 | 18198     | 0        | 1.14E-06 | 0        |
| Rbfox3        | NM_001039167 | 52897     | 0        | 0.014504 | 0        |
| Zfp2          | NM_001044699 |           | 0        | 0.033322 | 0        |
| Nkx2-2        | NM_001077632 | 18088     | 0        | 0.008159 | 0        |
| Gtf2ird1      | NM_001081469 | 57080     | 0        | 0.000713 | 0        |
| Gm14393       | NM_001085546 | 664987    | 0        | 0.042546 | 0        |
| Zfp541        | NM_001099277 | 666528    | 0        | 0.002198 | 0        |
| Foxi3         | NM_001101464 | 232077    | 0        | 0.037307 | 0        |
| Crem          | NM_001110856 | 12916     | 0        | 0.132886 | 0        |
| Hoxa10        | NM_001122950 | 15395     | 0        | 0.004849 | 0        |
| Trp73         | NM_001126330 | 22062     | 0        | 0.012624 | 0        |
| Trp63         | NM_001127259 | 22061     | 0        | 2.85E-06 | 0        |
| Trp63         | NM_001127260 | 22061     | 0        | 0.026185 | 0        |
| Trp63         | NM_001127261 | 22061     | 0        | 0.10535  | 0        |
| Lmo2          | NM_001142337 | 16909     | 0        | 0.230375 | 0        |
| Nr6a1         | NM_001159548 |           | 0        | 1.78E-05 | 0        |
| Satb1         | NM_001163631 | 20230     | 0        | 4.03E-05 | 0        |

|               |              |        |   |          |         |
|---------------|--------------|--------|---|----------|---------|
| Ankrd7        | NM_001167757 | 75196  | 0 | 5.07E-06 | 0       |
| Tfdp2         | NM_001184710 | 211586 | 0 | 0.055306 | 0       |
| Crxos         | NM_001205274 | 546024 | 0 | 0.0098   | 0       |
| Pax6          | NM_001244202 |        | 0 | 6.06E-07 | 0       |
| Gtf2ird1      | NM_001244936 | 57080  | 0 | 0.000118 | 0       |
| Zfp672        | NM_001256519 |        | 0 | 0.138333 | 0       |
| Nrl           | NM_001271917 |        | 0 | 0.00436  | 0       |
| Ciita         | NM_007575    | 12265  | 0 | 1.51E-05 | 0       |
| Gcm2          | NM_008104    | 107889 | 0 | 0.003564 | 0       |
| Hoxa10        | NM_008263    | 15395  | 0 | 9.39E-07 | 0       |
| Hoxa13        | NM_008264    | 15398  | 0 | 0.00849  | 0       |
| Myf5          | NM_008656    | 17877  | 0 | 0.005048 | 0       |
| Pdx1          | NM_008814    | 18609  | 0 | 0.008649 | 0       |
| Phox2b        | NM_008888    | 18935  | 0 | 0.057854 | 0       |
| Hnf1b         | NM_009330    | 21410  | 0 | 0.018776 | 0       |
| Thrb          | NM_009380    | 21834  | 0 | 4.33E-06 | 0       |
| Zfp42         | NM_009556    | 22702  | 0 | 0.023685 | 0       |
| Cdx1          | NM_009880    | 12590  | 0 | 0.012225 | 0       |
| Hesx1         | NM_010420    | 15209  | 0 | 0.019986 | 0       |
| Hoxa6         | NM_010454    | 15403  | 0 | 0.109736 | 0       |
| Hoxc6         | NM_010465    | 15425  | 0 | 0.013585 | 0       |
| Nkx2-6        | NM_010920    | 18092  | 0 | 0.0098   | 0       |
| Pax7          | NM_011039    | 18509  | 0 | 0.004703 | 0       |
| Pax8          | NM_011040    | 18510  | 0 | 0.004096 | 0       |
| Pitx1         | NM_011097    | 18740  | 0 | 0.016954 | 0       |
| Pitx2         | NM_011098    | 18741  | 0 | 0.116545 | 0       |
| Msxn1         | NM_019544    | 56184  | 0 | 0.02439  | 0       |
| Dmrtb1        | NM_019872    | 56296  | 0 | 0.005943 | 0       |
| Pmfbbp1       | NM_019938    | 56523  | 0 | 0.002991 | 0       |
| Mnx1          | NM_019944    | 15285  | 0 | 0.015023 | 0       |
| Foxb1         | NM_022378    | 64290  | 0 | 0.010292 | 0       |
| Nkx2-4        | NM_023504    | 228731 | 0 | 0.021597 | 0       |
| Foxi1         | NM_023907    | 14233  | 0 | 0.004421 | 0       |
| Anks4b        | NM_028085    | 72074  | 0 | 0.005192 | 0       |
| Myog          | NM_031189    | 17928  | 0 | 0.235961 | 0       |
| Pou4f2        | NM_138944    | 18997  | 0 | 0.003173 | 0       |
| Sp8           | NM_177082    | 320145 | 0 | 0.006719 | 0       |
| 4932411N23Rik | NM_177705    | 237029 | 0 | 0.002985 | 0       |
| Nr1h5         | NM_201622    | 381463 | 0 | 0.011861 | 0       |
| Ralgapa1      | NM_001003719 | 56784  | 0 | 0        | #DIV/0! |
| Zscan4c       | NM_001013765 | 245109 | 0 | 0        | #DIV/0! |
| Hoxc11        | NM_001024842 | 109663 | 0 | 0        | #DIV/0! |
| Rhox10        | NM_001024850 | 434769 | 0 | 0        | #DIV/0! |
| Rhox1         | NM_001025084 | 385343 | 0 | 0        | #DIV/0! |
| Gm4981        | NM_001034869 | 245263 | 0 | 0        | #DIV/0! |
| Musk          | NM_001037129 | 18198  | 0 | 0        | #DIV/0! |

|          |              |           |   |   |         |
|----------|--------------|-----------|---|---|---------|
| Gm4745   | NM_001038676 | 194588    | 0 | 0 | #DIV/0! |
| Rhox4a   | NM_001039688 | 664609    | 0 | 0 | #DIV/0! |
| Rhox4c   | NM_001039689 | 434759    | 0 | 0 | #DIV/0! |
| Rhox4d   | NM_001039695 | 664610    | 0 | 0 | #DIV/0! |
| Rhox4f   | NM_001039696 | 636177    | 0 | 0 | #DIV/0! |
| Rhox4g   | NM_001039698 | 664608    | 0 | 0 | #DIV/0! |
| Zfp869   | NM_001039967 | 66869     | 0 | 0 | #DIV/0! |
| Cdkn2a   | NM_001040654 | 12578     | 0 | 0 | #DIV/0! |
| Nfyc     | NM_001048168 |           | 0 | 0 | #DIV/0! |
| Gtf2ird1 | NM_001081470 | 57080     | 0 | 0 | #DIV/0! |
| Gm14391  | NM_001099308 | 665001    | 0 | 0 | #DIV/0! |
| Rhox2b   | NM_001099316 | 100039913 | 0 | 0 | #DIV/0! |
| Rhox2c   | NM_001099318 | 100039948 | 0 | 0 | #DIV/0! |
| Gm14305  | NM_001099327 |           | 0 | 0 | #DIV/0! |
| Gm14308  | NM_001099349 | 100043381 | 0 | 0 | #DIV/0! |
| Gm4631   | NM_001100416 | 627914    | 0 | 0 | #DIV/0! |
| Rhox2h   | NM_001100465 | 622301    | 0 | 0 | #DIV/0! |
| Rhox3c   | NM_001102457 | 100135654 | 0 | 0 | #DIV/0! |
| Cic      | NM_001110131 | 71722     | 0 | 0 | #DIV/0! |
| Zscan4f  | NM_001110316 | 100862415 | 0 | 0 | #DIV/0! |
| Crem     | NM_001110853 | 12916     | 0 | 0 | #DIV/0! |
| Eaf2     | NM_001113405 | 106389    | 0 | 0 | #DIV/0! |
| Rhox2g   | NM_001114153 | 434766    | 0 | 0 | #DIV/0! |
| Rhox3h   | NM_001114157 | 434758    | 0 | 0 | #DIV/0! |
| Nfia     | NM_001122952 | 18027     | 0 | 0 | #DIV/0! |
| Zfp735   | NM_001126489 | 76390     | 0 | 0 | #DIV/0! |
| Nfe2l1   | NM_001130451 | 18023     | 0 | 0 | #DIV/0! |
| Nfe2l1   | NM_001130453 | 18023     | 0 | 0 | #DIV/0! |
| Nfe2l1   | NM_001130454 | 18023     | 0 | 0 | #DIV/0! |
| Tcf7l2   | NM_001142918 | 21416     | 0 | 0 | #DIV/0! |
| Gm14139  | NM_001145863 |           | 0 | 0 | #DIV/0! |
| Runx2    | NM_001146038 | 12393     | 0 | 0 | #DIV/0! |
| Rfx6     | NM_001159389 | 320995    | 0 | 0 | #DIV/0! |
| Pax4     | NM_001159925 | 18506     | 0 | 0 | #DIV/0! |
| Pax4     | NM_001159926 | 18506     | 0 | 0 | #DIV/0! |
| Pgbd1    | NM_001162919 | 319207    | 0 | 0 | #DIV/0! |
| Nr1h4    | NM_001163700 | 20186     | 0 | 0 | #DIV/0! |
| Nrf1     | NM_001164228 | 18181     | 0 | 0 | #DIV/0! |
| Nrf1     | NM_001164230 | 18181     | 0 | 0 | #DIV/0! |
| Zfp169   | NM_001164576 | 67911     | 0 | 0 | #DIV/0! |
| Gm6710   | NM_001164689 | 626832    | 0 | 0 | #DIV/0! |
| Rara     | NM_001177303 |           | 0 | 0 | #DIV/0! |
| Gm14326  | NM_001177480 | 665001    | 0 | 0 | #DIV/0! |
| Zfp600   | NM_001177545 |           | 0 | 0 | #DIV/0! |
| Zfp600   | NM_001177546 |           | 0 | 0 | #DIV/0! |
| Tsc22d1  | NM_001177751 | 21807     | 0 | 0 | #DIV/0! |

|               |              |           |   |   |         |
|---------------|--------------|-----------|---|---|---------|
| Rex2          | NM_001177767 | 100043034 | 0 | 0 | #DIV/0! |
| Rhox3e        | NM_001184969 | 100135657 | 0 | 0 | #DIV/0! |
| Rhox13        | NM_001185002 | 73614     | 0 | 0 | #DIV/0! |
| Camta2        | NM_001190376 |           | 0 | 0 | #DIV/0! |
| Foxp3         | NM_001199347 |           | 0 | 0 | #DIV/0! |
| 5730507C01Rik | NM_001201330 | 236366    | 0 | 0 | #DIV/0! |
| Hdac7         | NM_001204278 | 56233     | 0 | 0 | #DIV/0! |
| Zfp648        | NM_001204908 | 100503355 | 0 | 0 | #DIV/0! |
| Gm8923        | NM_001242944 | 100190996 | 0 | 0 | #DIV/0! |
| Nr1i3         | NM_001243062 | 12355     | 0 | 0 | #DIV/0! |
| Nr1i3         | NM_001243063 | 12355     | 0 | 0 | #DIV/0! |
| 2010315B03Rik | NM_001243117 |           | 0 | 0 | #DIV/0! |
| 2010315B03Rik | NM_001243118 |           | 0 | 0 | #DIV/0! |
| 2010315B03Rik | NM_001243119 |           | 0 | 0 | #DIV/0! |
| St18          | NM_001244692 |           | 0 | 0 | #DIV/0! |
| Tcf12         | NM_001253863 | 21406     | 0 | 0 | #DIV/0! |
| Aire          | NM_001271549 | 11634     | 0 | 0 | #DIV/0! |
| Aire          | NM_001271550 | 11634     | 0 | 0 | #DIV/0! |
| Aire          | NM_001271551 | 11634     | 0 | 0 | #DIV/0! |
| Aire          | NM_001271552 | 11634     | 0 | 0 | #DIV/0! |
| Aire          | NM_001271553 | 11634     | 0 | 0 | #DIV/0! |
| Aire          | NM_001271554 | 11634     | 0 | 0 | #DIV/0! |
| Aire          | NM_001271555 | 11634     | 0 | 0 | #DIV/0! |
| Aire          | NM_001271556 | 11634     | 0 | 0 | #DIV/0! |
| Aire          | NM_001271557 | 11634     | 0 | 0 | #DIV/0! |
| Aire          | NM_001271558 | 11634     | 0 | 0 | #DIV/0! |
| Aire          | NM_001271559 | 11634     | 0 | 0 | #DIV/0! |
| Runx2         | NM_001271627 | 12393     | 0 | 0 | #DIV/0! |
| Runx2         | NM_001271631 | 12393     | 0 | 0 | #DIV/0! |
| NrOb1         | NM_007430    | 11614     | 0 | 0 | #DIV/0! |
| Neurod4       | NM_007501    | 11923     | 0 | 0 | #DIV/0! |
| Vsx2          | NM_007701    | 12677     | 0 | 0 | #DIV/0! |
| Evx1          | NM_007966    | 14028     | 0 | 0 | #DIV/0! |
| Evx2          | NM_007967    | 14029     | 0 | 0 | #DIV/0! |
| Foxb2         | NM_008023    | 14240     | 0 | 0 | #DIV/0! |
| Hoxb13        | NM_008267    | 15408     | 0 | 0 | #DIV/0! |
| Hoxc9         | NM_008272    | 15427     | 0 | 0 | #DIV/0! |
| Hoxd12        | NM_008274    | 15432     | 0 | 0 | #DIV/0! |
| Sebox         | NM_008759    | 18292     | 0 | 0 | #DIV/0! |
| Pou1f1        | NM_008849    | 18736     | 0 | 0 | #DIV/0! |
| Prop1         | NM_008936    | 19127     | 0 | 0 | #DIV/0! |
| Zfy1          | NM_009570    |           | 0 | 0 | #DIV/0! |
| Zfy2          | NM_009571    |           | 0 | 0 | #DIV/0! |
| Zic4          | NM_009576    | 22774     | 0 | 0 | #DIV/0! |
| Aire          | NM_009646    | 11634     | 0 | 0 | #DIV/0! |
| Nr1i3         | NM_009803    | 12355     | 0 | 0 | #DIV/0! |

|               |           |        |   |   |         |
|---------------|-----------|--------|---|---|---------|
| Emx1          | NM_010131 | 13796  | 0 | 0 | #DIV/0! |
| Hoxa11        | NM_010450 | 15396  | 0 | 0 | #DIV/0! |
| Hoxc12        | NM_010463 | 15421  | 0 | 0 | #DIV/0! |
| Mycs          | NM_010850 | 17870  | 0 | 0 | #DIV/0! |
| Neurog1       | NM_010896 | 18014  | 0 | 0 | #DIV/0! |
| Otp           | NM_011021 | 18420  | 0 | 0 | #DIV/0! |
| Pax4          | NM_011038 | 18506  | 0 | 0 | #DIV/0! |
| Pparg         | NM_011146 | 19016  | 0 | 0 | #DIV/0! |
| Six6          | NM_011384 | 20476  | 0 | 0 | #DIV/0! |
| Sox14         | NM_011440 | 20669  | 0 | 0 | #DIV/0! |
| Sry           | NM_011564 | 21674  | 0 | 0 | #DIV/0! |
| Hsf4          | NM_011939 | 26386  | 0 | 0 | #DIV/0! |
| Figla         | NM_012013 | 26910  | 0 | 0 | #DIV/0! |
| Crem          | NM_013498 | 12916  | 0 | 0 | #DIV/0! |
| Pax6          | NM_013627 |        | 0 | 0 | #DIV/0! |
| Sall2         | NM_015772 | 50524  | 0 | 0 | #DIV/0! |
| Rhox4b        | NM_021300 | 57737  | 0 | 0 | #DIV/0! |
| Taf1a         | NM_021466 | 21339  | 0 | 0 | #DIV/0! |
| Irx6          | NM_022428 | 64379  | 0 | 0 | #DIV/0! |
| Hmgb4         | NM_027036 | 69317  | 0 | 0 | #DIV/0! |
| H2bfm         | NM_027067 | 69389  | 0 | 0 | #DIV/0! |
| Hsfy2         | NM_027661 | 71066  | 0 | 0 | #DIV/0! |
| Dmrtc2        | NM_027732 | 71241  | 0 | 0 | #DIV/0! |
| Obox1         | NM_027802 | 71468  | 0 | 0 | #DIV/0! |
| Zfp131        | NM_028245 | 72465  | 0 | 0 | #DIV/0! |
| Rhox2a        | NM_029203 | 75199  | 0 | 0 | #DIV/0! |
| Ferd3l        | NM_033522 | 114712 | 0 | 0 | #DIV/0! |
| Foxp3         | NM_054039 |        | 0 | 0 | #DIV/0! |
| Otx2          | NM_144841 | 18424  | 0 | 0 | #DIV/0! |
| Obox3         | NM_145707 | 246791 | 0 | 0 | #DIV/0! |
| Obox2         | NM_145708 | 246792 | 0 | 0 | #DIV/0! |
| Obox5         | NM_145709 | 252829 | 0 | 0 | #DIV/0! |
| Hmx2          | NM_145998 |        | 0 | 0 | #DIV/0! |
| Rorb          | NM_146095 | 225998 | 0 | 0 | #DIV/0! |
| Tfap2d        | NM_153154 | 226896 | 0 | 0 | #DIV/0! |
| Helt          | NM_173789 | 234219 | 0 | 0 | #DIV/0! |
| Hoxc5         | NM_175730 | 15424  | 0 | 0 | #DIV/0! |
| Rfx6          | NM_177306 | 320995 | 0 | 0 | #DIV/0! |
| Nhlh2         | NM_178777 | 18072  | 0 | 0 | #DIV/0! |
| 2410141K09Rik | NM_183119 | 76803  | 0 | 0 | #DIV/0! |
| Foxi2         | NM_183193 | 270004 | 0 | 0 | #DIV/0! |
| Nkx6-2        | NM_183248 | 14912  | 0 | 0 | #DIV/0! |
| Duxbl1        | NM_183389 | 278672 | 0 | 0 | #DIV/0! |
| Rhox3a        | NM_194063 | 382209 | 0 | 0 | #DIV/0! |
| Rhox11        | NM_198598 | 194738 | 0 | 0 | #DIV/0! |
| Pou2f1        | NM_198933 | 18986  | 0 | 0 | #DIV/0! |

|        |           |        |   |   |         |
|--------|-----------|--------|---|---|---------|
| Pou2f1 | NM_198934 | 18986  | 0 | 0 | #DIV/0! |
| Rhox4e | NM_201236 | 194856 | 0 | 0 | #DIV/0! |
