# Supplementary material
Source: PubMed Central journal article supplement (PMC4828257)

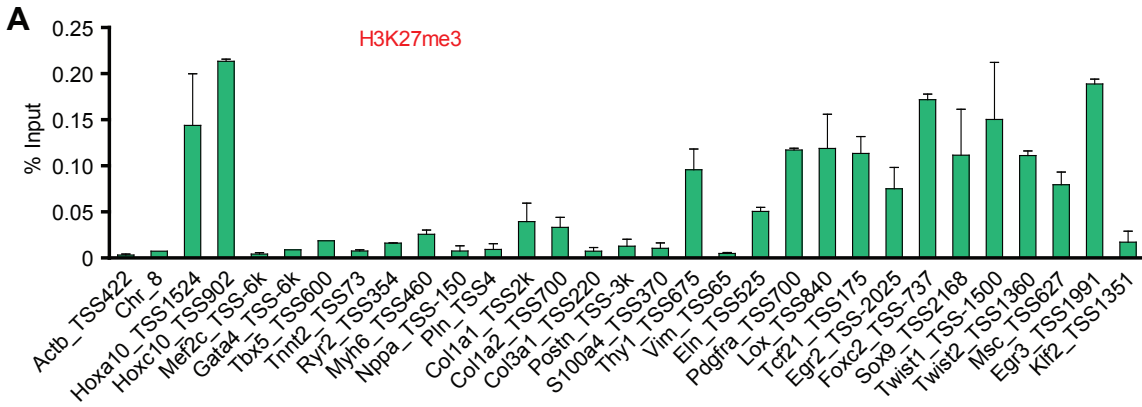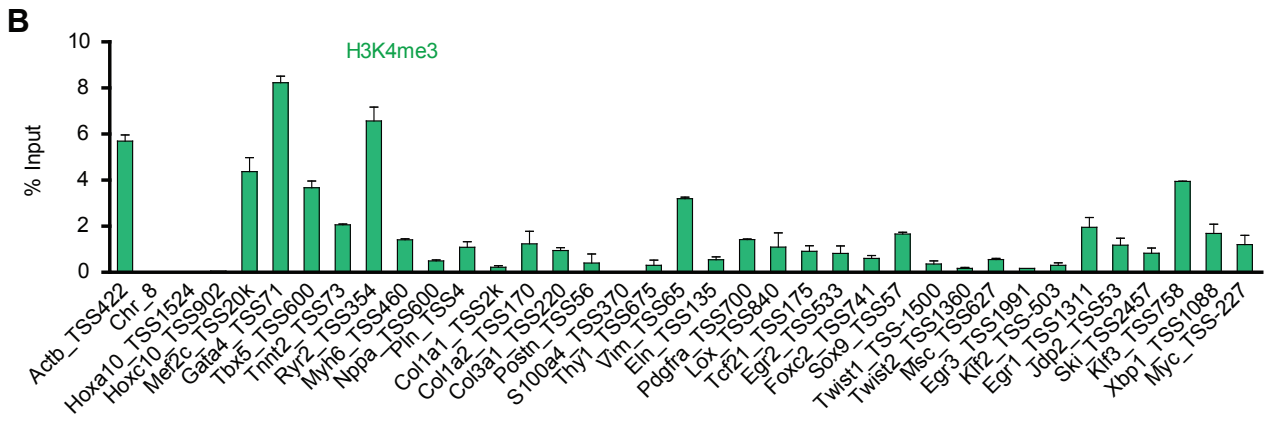

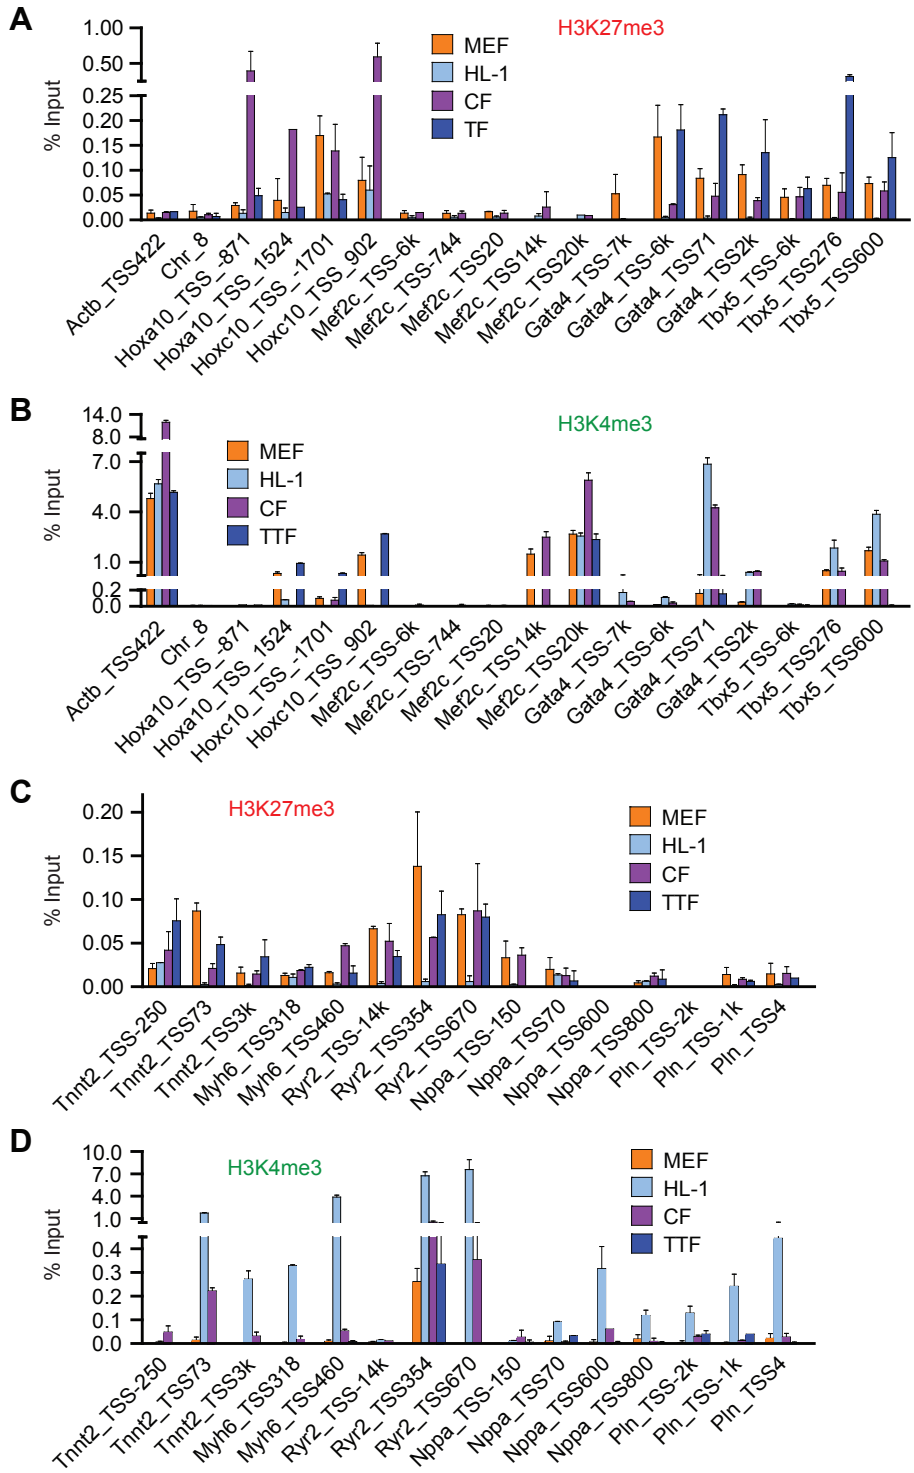

Supplementary figure 2

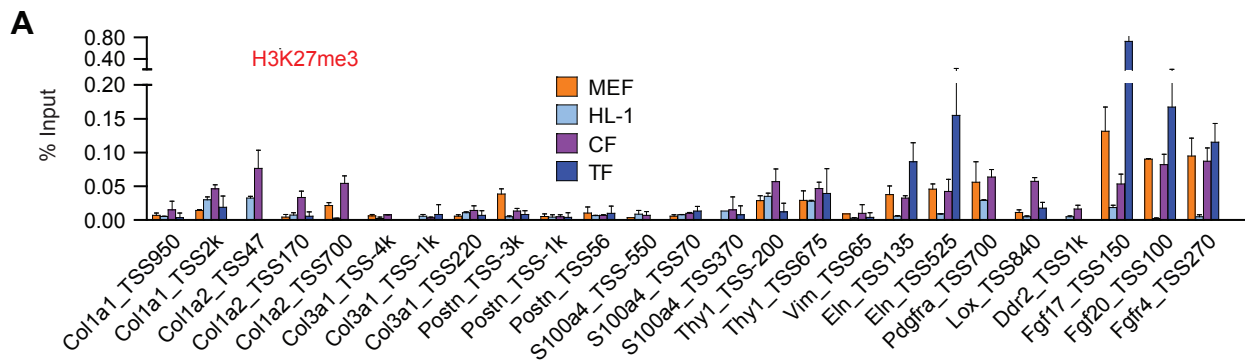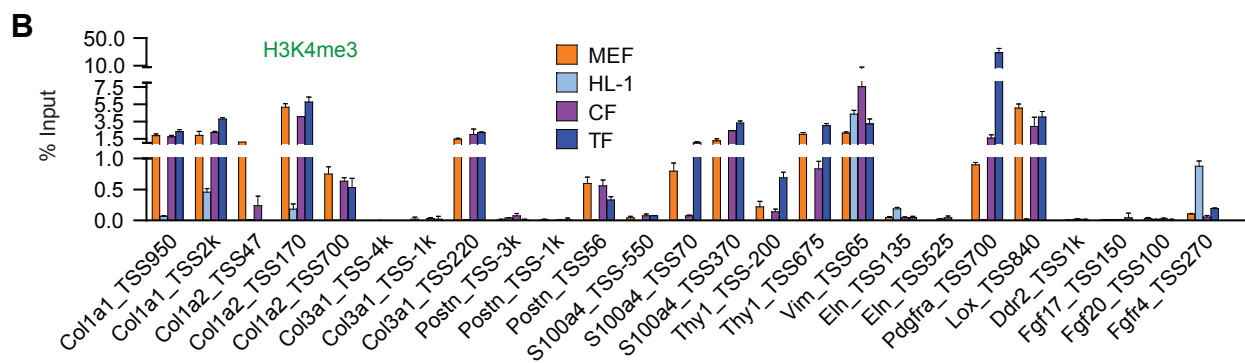

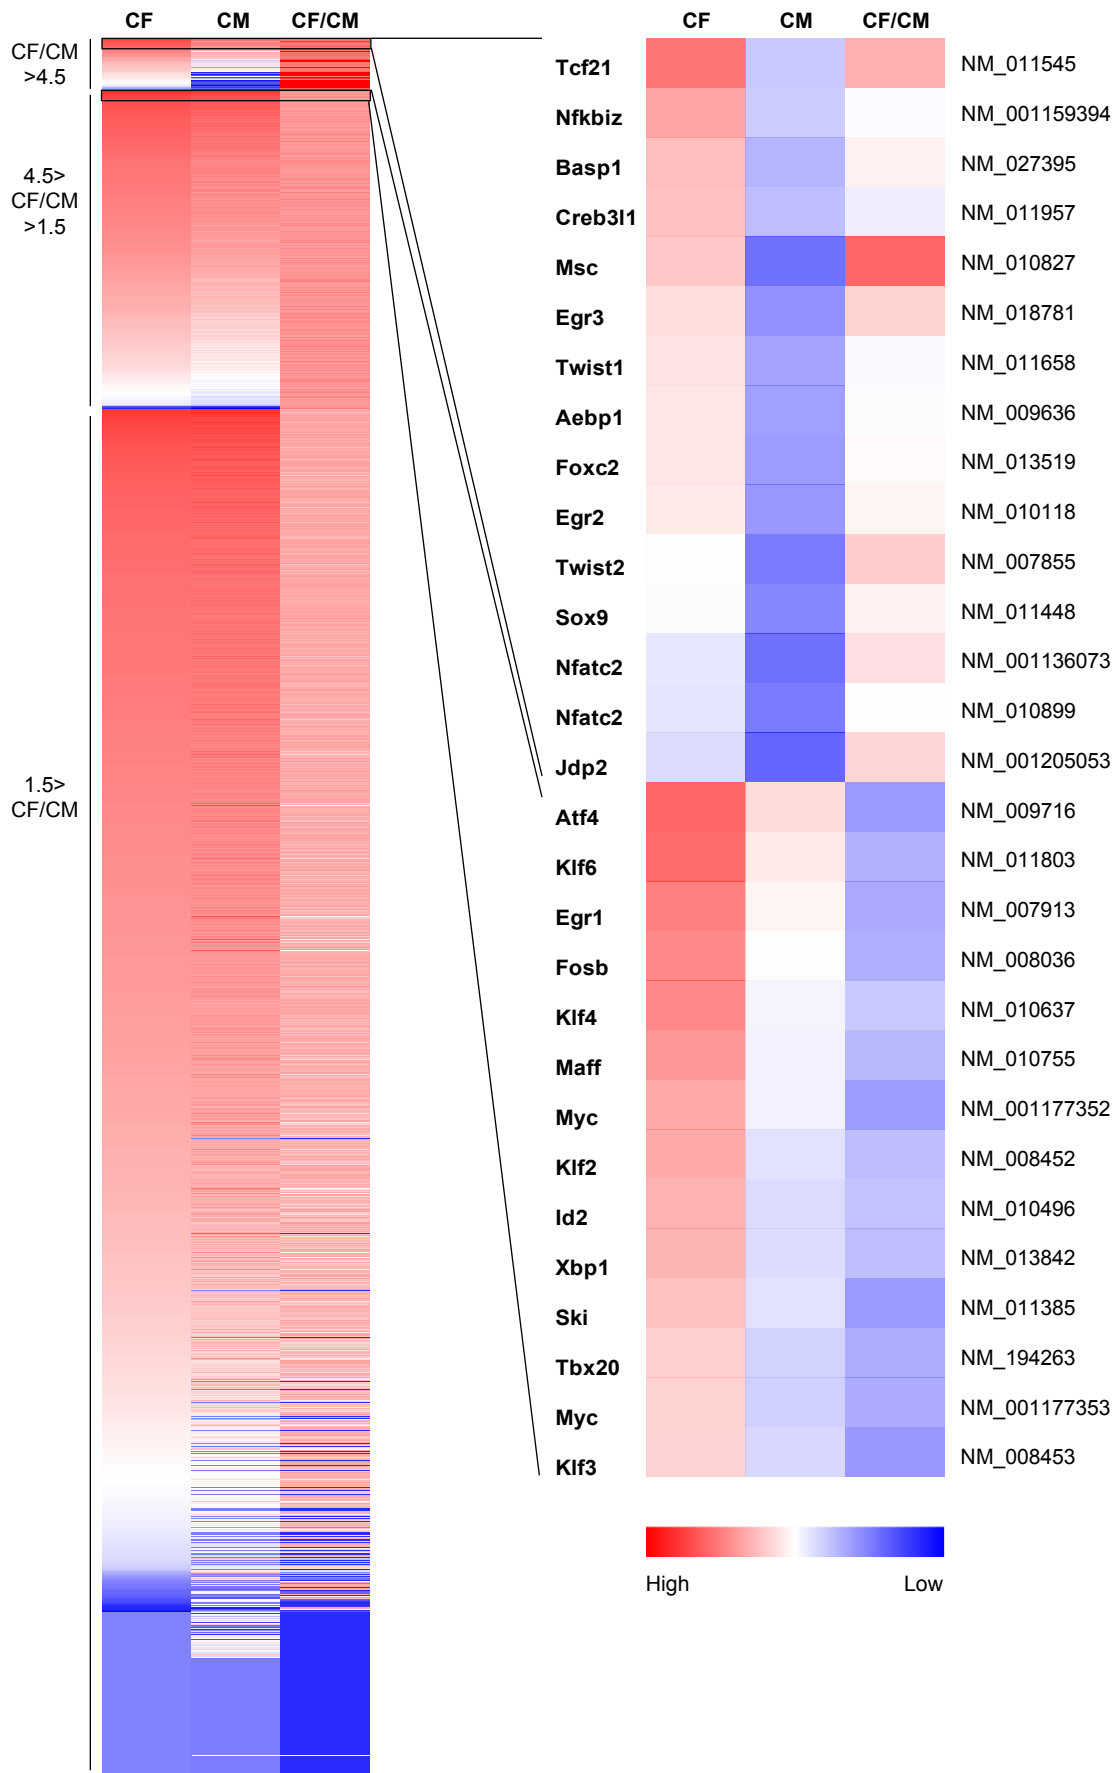

Supplementary figure 4

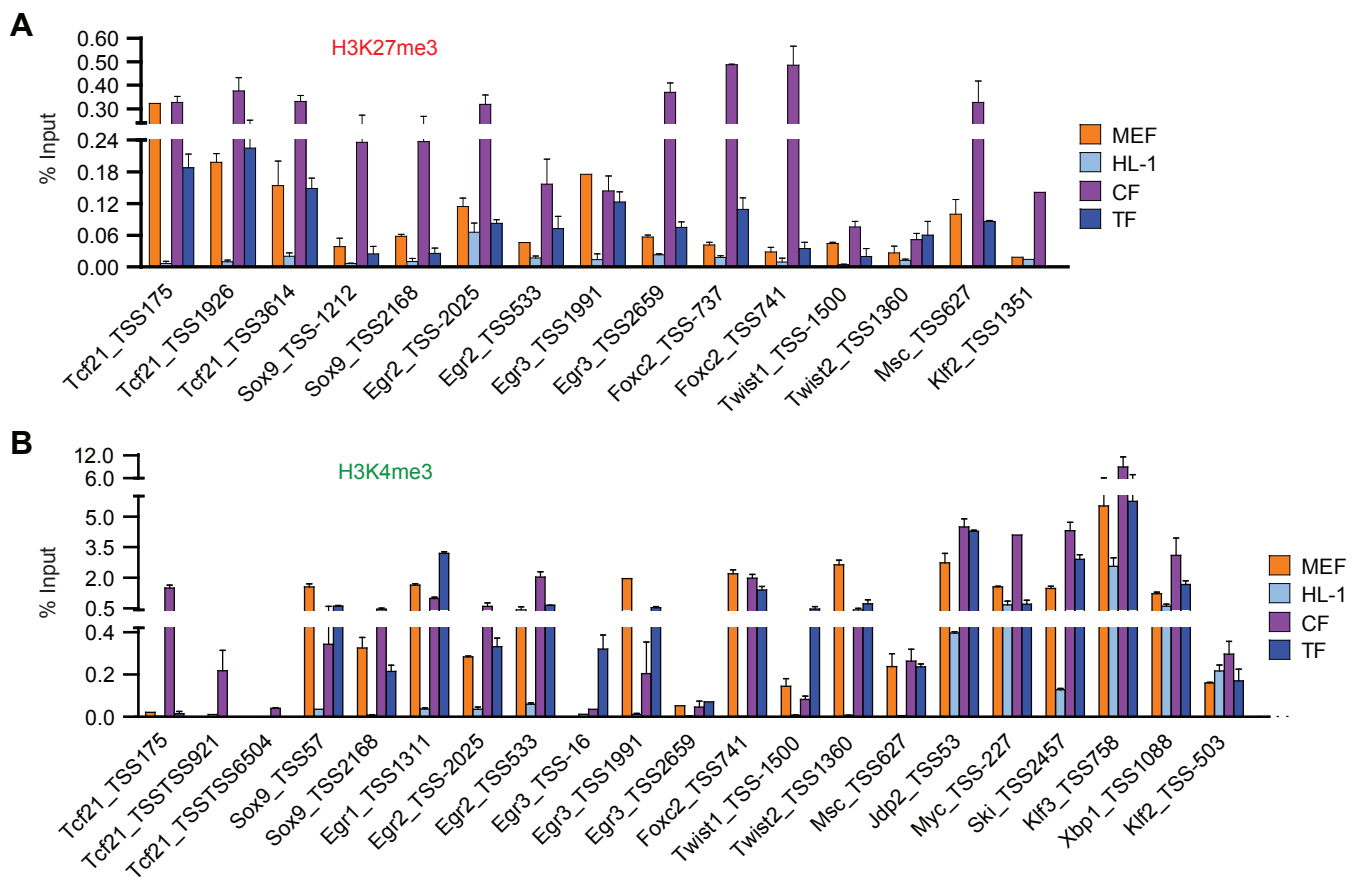

Supplementary figure 5

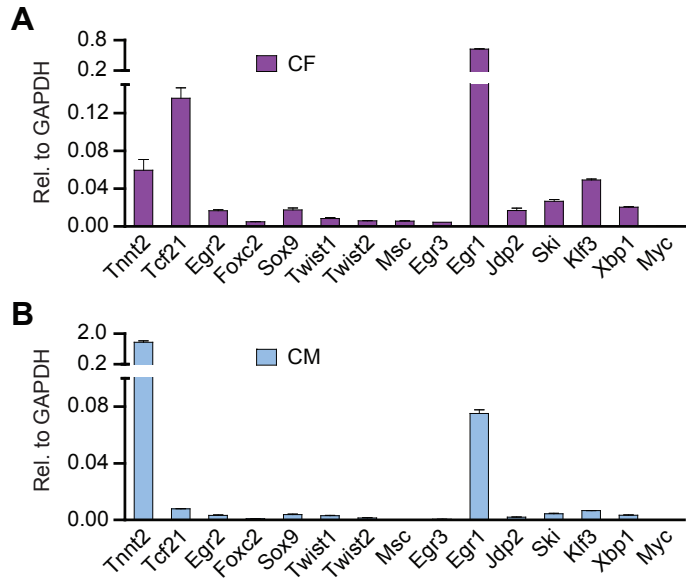

Supplementary figure 6

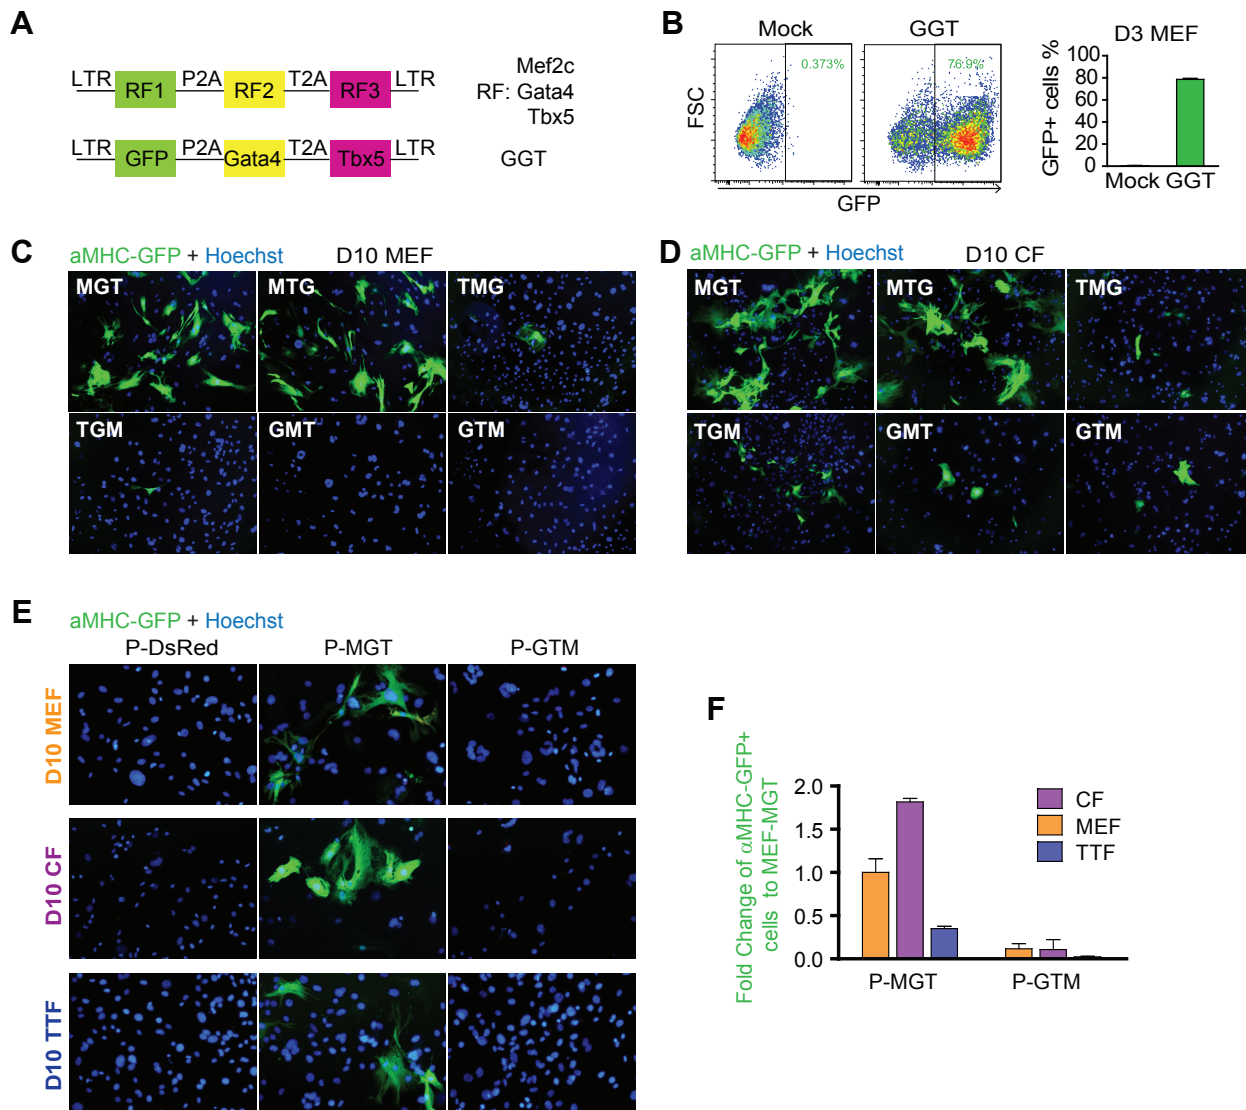

Supplement: NIHMS764289-supplement-1.pdf [file NIHMS764289-supplement-1.pdf]
